# Supplementary material for: US veterans administration diabetes risk (VADR) national cohort: cohort profile
Source: PubMed Central journal article supplement — BMJ Open. 2020 Dec 4;10(12):e039489. doi: 10.1136/bmjopen-2020-039489 (PMC7722386; doi:10.1136/bmjopen-2020-039489), 2020-12-04
Supplement: bmjopen-2020-039489.draft_revisions.pdf [file bmjopen-2020-039489.draft_revisions.pdf]

# BMJ Open

BMJ Open is committed to open peer review. As part of this commitment we make the peer review history of every article we publish publicly available.

When an article is published we post the peer reviewers' comments and the authors' responses online. We also post the versions of the paper that were used during peer review. These are the versions that the peer review comments apply to.

The versions of the paper that follow are the versions that were submitted during the peer review process. They are not the versions of record or the final published versions. They should not be cited or distributed as the published version of this manuscript.

BMJ Open is an open access journal and the full, final, typeset and author-corrected version of record of the manuscript is available on our site with no access controls, subscription charges or pay-per-view fees (<http://bmjopen.bmj.com>).

If you have any questions on BMJ Open's open peer review process please email [info.bmjopen@bmj.com](mailto:info.bmjopen@bmj.com)

# BMJ Open

## Cohort Profile: The US Veterans Administration Diabetes Risk (VADR) National Cohort

|                               |                                                                                                                                                                                                                                                                                                                                                                                                                                                                                                      |
|-------------------------------|------------------------------------------------------------------------------------------------------------------------------------------------------------------------------------------------------------------------------------------------------------------------------------------------------------------------------------------------------------------------------------------------------------------------------------------------------------------------------------------------------|
| Journal:                      | <i>BMJ Open</i>                                                                                                                                                                                                                                                                                                                                                                                                                                                                                      |
| Manuscript ID                 | bmjopen-2020-039489                                                                                                                                                                                                                                                                                                                                                                                                                                                                                  |
| Article Type:                 | Cohort profile                                                                                                                                                                                                                                                                                                                                                                                                                                                                                       |
| Date Submitted by the Author: | 07-May-2020                                                                                                                                                                                                                                                                                                                                                                                                                                                                                          |
| Complete List of Authors:     | Avramovic, Sanja; George Mason University; VA New York Harbor Healthcare System<br>Alemi, Farrokh ; George Mason University<br>Kanchi, Rania; New York University School of Medicine<br>Lopez, Priscilla; New York University School of Medicine<br>Hayes, Richard; New York University School of Medicine<br>Thorpe, Lorna; New York University School of Medicine, Department of Population Health<br>Schwartz, Mark; New York University School of Medicine; VA New York Harbor Healthcare System |
| Keywords:                     | General diabetes < DIABETES & ENDOCRINOLOGY, Health informatics < BIOTECHNOLOGY & BIOINFORMATICS, EPIDEMIOLOGY                                                                                                                                                                                                                                                                                                                                                                                       |
|                               |                                                                                                                                                                                                                                                                                                                                                                                                                                                                                                      |

SCHOLARONE™  
Manuscripts

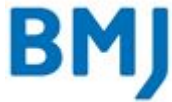

I, the Submitting Author has the right to grant and does grant on behalf of all authors of the Work (as defined in the below author licence), an exclusive licence and/or a non-exclusive licence for contributions from authors who are: i) UK Crown employees; ii) where BMJ has agreed a CC-BY licence shall apply, and/or iii) in accordance with the terms applicable for US Federal Government officers or employees acting as part of their official duties; on a worldwide, perpetual, irrevocable, royalty-free basis to BMJ Publishing Group Ltd ("BMJ") its licensees and where the relevant Journal is co-owned by BMJ to the co-owners of the Journal, to publish the Work in this journal and any other BMJ products and to exploit all rights, as set out in our [licence](#).

The Submitting Author accepts and understands that any supply made under these terms is made by BMJ to the Submitting Author unless you are acting as an employee on behalf of your employer or a postgraduate student of an affiliated institution which is paying any applicable article publishing charge ("APC") for Open Access articles. Where the Submitting Author wishes to make the Work available on an Open Access basis (and intends to pay the relevant APC), the terms of reuse of such Open Access shall be governed by a Creative Commons licence – details of these licences and which [Creative Commons](#) licence will apply to this Work are set out in our licence referred to above.

Other than as permitted in any relevant BMJ Author's Self Archiving Policies, I confirm this Work has not been accepted for publication elsewhere, is not being considered for publication elsewhere and does not duplicate material already published. I confirm all authors consent to publication of this Work and authorise the granting of this licence.

## Cohort Profile: The US Veterans Administration Diabetes Risk (VADR) National Cohort

Sanja Avramovic,<sup>1,3</sup> Farrokh Alemi,<sup>1</sup> Rania Kanchi,<sup>2</sup> Priscilla Lopez,<sup>2</sup> Richard B Hayes,<sup>2</sup> Lorna E. Thorpe,<sup>2</sup> Mark D Schwartz<sup>2,3</sup>

<sup>1</sup> Department of Health Administration and Policy, George Mason University, Fairfax, VA

<sup>2</sup> Department of Population Health, NYU School of Medicine, New York, NY

<sup>3</sup> VA New York Harbor Healthcare System, New York, NY

Correspondence to

Dr. Sanja Avramovic; savramov@gmu.edu

### Abstract

**Purpose** The VADR cohort facilitates studies on temporal and geographic patterns of prediabetes and diabetes, as well as targeted studies of their predictors. The cohort provides an infrastructure for examination of novel individual and community-level risk factors for diabetes and their consequences among veterans. This cohort also establishes a baseline against which to assess the impact of national or regional strategies to prevent diabetes in veterans.

**Participants** The VA Diabetes Risk Cohort (VADR) includes all 6,082,246 veterans in the United States who were diabetes-free as of January 1, 2008, or who subsequently enrolled in the VA for primary care and were diabetes-free at cohort entry through December 31, 2016, and who had at least 2 diabetes-free visits to a VA primary care service at least 30 days apart within any 5-year period since January 1, 2003.

**Findings to date** The incidence rate of type 2 diabetes in this cohort of over 6 million veterans followed for a median of 5.5 years (over 35 million person-years) was 26 per 1000 person-years. During the study period, 8.5% of the cohort were lost to follow-up and 17.7% died. Many demographic, comorbidity, and other clinical variables were more prevalent among patients with incident diabetes.

**Future Plans** This cohort will be used to study community-level risk factors for diabetes, such as attributes of the food environment and neighborhood socioeconomic status via geospatial linkage to residence address information.

### Strengths and limitations of this study

- A strength of this national cohort is that it has a large size, a high degree of long-term follow-up, and a comprehensive set of variables.
- The VA healthcare system is the nation's largest integrated healthcare system, in which veterans are followed across all VA facilities and in-system providers.
- Documented data is restricted to that which is collected in EHRs during the course of clinical practice, leading to the possibility of confounding, selection bias and measurement error.

- The veteran population is predominantly male and white, and so the findings may not generalize to minorities or to women.

## Introduction

Diabetes mellitus (diabetes) is a chronic disease that affects 34.2 million (10.5%) of adults and children in the United States (US).<sup>1</sup> As of 2018, diabetes was the seventh leading cause of death and one of the major contributors to heart disease and stroke.<sup>2</sup> Adjusting for age and gender, all-cause mortality is 1.5 times greater for people with diabetes than for people without diabetes, and average health care costs are 2.3 times higher.<sup>3</sup> Another 88 million American adults (34.5%) are estimated to have prediabetes and at risk of developing diabetes.<sup>4</sup>

The Veterans Administration (VA) cares for more than 8 million US veterans, of whom approximately 25% have diabetes.<sup>5,6</sup> The annual mortality rate among veterans with diabetes is 5%—nearly double that of veterans without diabetes.<sup>7,8</sup> It is likely that nearly 3 million other veterans have prediabetes. These high rates compared to the general population may be due to the increased proportions of overweight (37%) and obesity (41%) among veterans,<sup>9</sup> their older age, lower socioeconomic status,<sup>10</sup> and possible exposure to herbicides such as Agent Orange.<sup>11</sup>

Behavioral prevention interventions can reduce the incidence of diabetes by 50–70%,<sup>12,13</sup> but scaling this up for population impact has been challenging due to the intensity and cost of the intervention and challenges of enrolling patients for such programs.<sup>14-17</sup>

In response to these challenges, we developed the Veterans Administration Diabetes Risk (VADR) Cohort, a national cohort of all US veterans enrolled at the Veterans Health Administration (VHA) since January 1, 2008 who were diabetes-free at enrollment. The cohort was developed as a part of the Diabetes Location, Environmental Attributes, and Disparities (LEAD) network; a Center for Disease Control and Prevention (CDC) funded research collaboration among Drexel University, Geisinger-Johns Hopkins, New York University School of Medicine, and University of Alabama at Birmingham with the CDC as a collaborative scientific partner in the network.<sup>18</sup> The VADR cohort facilitates studies on temporal and geographic patterns of prediabetes and diabetes, as well as targeted studies of their predictors. The cohort provides an infrastructure for examination of novel individual and community-level risk factors for diabetes and their consequences among veterans. This cohort also establishes a baseline against which to assess the impact of national or regional strategies to prevent diabetes in veterans.

## Cohort description

VADR is the largest national cohort of diabetes-free adults in the US. Established in 2017 as a dynamic cohort enabled by the VA national electronic health record (EHR), the cohort includes diabetes-free US veterans enrolled in primary care clinics at any VA facility as early as January 1, 2008 through December 31, 2016, and followed from cohort entry through December 31, 2018. VA primary care clinics operate in 170 VA Medical Centers (VAMCs) and in more than 1,000 Community-Based Outpatient Clinics (CBOCs) across the US.<sup>19</sup> As a dynamic cohort, subject entry and follow-up is ongoing, but this paper reports on the cohort from 2008 through 2018.

1  
2  
3 Building on published, validated criteria in EHRs,<sup>7,20</sup> we defined diabetes using the following  
4 query-based definition comprised of any of three criteria: (1) at least two encounters (inpatient  
5 or outpatient) with documentation of a Type 2 diabetes ICD-9/10 code (ICD-9: 250.x; ICD-10:  
6 E11.x) or (2) a documented prescription for a diabetes medication other than metformin or  
7 acarbose alone; or (3) at least one encounter with a diabetes ICD-9/10 code and two elevated  
8 ( $\geq 6.5\%$ ) glycosylated hemoglobin (Hgb A1C) lab test results (see Appendix for complete  
9 definition).<sup>21</sup> We excluded metformin or acarbose alone from the criteria because these drugs  
10 may be used for diabetes prevention in patients with prediabetes; including them may lead to  
11 misclassifying cases of prediabetes as diabetes.<sup>22,23</sup> This definition was used to exclude  
12 prevalent diabetes cases prior to cohort entry and to estimate diabetes incidence during the  
13 study period.  
14  
15  
16

17 For etiologic analyses, subjects were eligible for the cohort if they were veterans with at least 2  
18 diabetes-free visits to a VA primary care service, occurring at least 30 days apart, from January  
19 1<sup>st</sup> 2003 to December 31<sup>st</sup> 2018. Cohort entry (baseline) was defined as either January 1, 2008  
20 or the date of the second diabetes-free primary care visit for subjects entering after January 1,  
21 2008. Eligible subjects were allowed to enter the cohort through December 31, 2016 to allow at  
22 least 2 years of follow-up during which subjects may be diagnosed with diabetes. Subjects were  
23 censored when they developed diabetes, died, or were lost to follow-up (defined as having no  
24 encounters in the VA health system for more than 2 years). Once a patient was lost-to-follow-  
25 up, they were not eligible to re-enter the cohort. Encounters for follow-up included any visits to  
26 primary care, specialists, emergency departments, walk-in clinics, hospitalizations, or nursing  
27 home stays at any VA facility. Person-years (PY) of follow-up for each subject were calculated as  
28 the interval between cohort entry date and censor date.  
29  
30  
31

32 As shown in **Figure 1**, the cohort was developed from a base total population of 8,346,180  
33 patients seen for at least 1 primary care visit between 1999, the earliest year for which EHR  
34 data were available on patients, and the start of the study period. The cohort was then  
35 restricted to patients seen in the five years prior to the study period start date, January 1, 2008.  
36 Patients were excluded if they had fewer than 2 primary care visits, at least 30 days apart  
37 during that five year time period and less than 2 primary care visits after cohort entry. After  
38 excluding patients with prevalent diabetes, the initial diabetes-free cohort included 2,968,855  
39 patients. Another 3,113,391 diabetes-free patients met the same eligibility criteria after the  
40 start of the study period and entered the cohort between January 1, 2008 and December 31,  
41 2016, resulting in a diabetes-free cohort of 6,082,246 patients.  
42  
43  
44

45 Information on subjects in the cohort was updated daily as it was drawn from EHR at all VA  
46 facilities into the VA corporate data warehouse (CDW), based on all clinical services provided  
47 and documented by the VA to subjects over time. All data in the cohort were obtained through  
48 the VA Informatics and Computing Infrastructure (VINCI), a secure, high performance interface  
49 with VA's national CDW, available through VA's Information Resource Center (VIREC).<sup>24</sup> The  
50 CDW contains data integrated from VA's electronic medical record (VISTA, Veterans Health  
51 Information Systems and Technology Architecture), including all administrative data (e.g. all  
52 dates of encounters and diagnostic codes for outpatient and inpatient care), patient  
53 demographic characteristics, clinical data (e.g. vital signs, health factors, pharmacy, laboratory,  
54  
55  
56  
57  
58  
59  
60

radiological, clinical notes, etc.), and healthcare utilization factors as they accrue over time, as the CDW is refreshed daily.<sup>25</sup>

The main outcome variable was a new diagnosis of Type 2 diabetes, measured using the definition described earlier.

### Predictor variables and covariates

All continuous variables with repeated measures, including anthropomorphic, vital signs, and laboratory values, were defined as the average of the two most recent measures, prior to or at the time of cohort entry. If only one measure was taken prior to cohort entry, that was used as the baseline measure. The rate of missing data for all variables was measured.

Demographic measures were captured at baseline, including age, gender, marital status, race/ethnicity. First address on file per patient in cohort were exported out of the VINCI environment, geocoded using ArcGIS<sup>26</sup> and Python<sup>27</sup>, and mapped to show number of patients in the cohort per census tract using QGIS.<sup>28</sup>

Glycemia and body weight are important predictors of diabetes. We measured Hgb A1c as a continuous value, and classified as normal (<5.7%), prediabetes (5.7% to 6.4%), or diabetes ( $\geq$ 6.5%). We measured weight in pounds and body mass index (BMI), defined as (weight in kilograms) / (height in meters)<sup>2</sup>. BMI was also classified as underweight (<18.5); normal (18.5 to <25); overweight (25.0 to <30); and obese ( $\geq$ 30.0).<sup>29</sup>

Common comorbidities measured at baseline included established risk factors for diabetes such as obesity, hypertension, gestational diabetes, cardiovascular disease, chronic kidney disease hyperuricemia, fatty liver disease, polycystic ovary syndrome, and hepatitis C. These and all other comorbidities were defined as having at least 1 ICD code in the EHR prior to entering the cohort. Hyperlipidemia was defined as at least 2 encounters with ICD codes for hyperlipidemia, total cholesterol >240 mg/dL, or the use of lipid lowering medications.<sup>30</sup> Hypertension was defined as at least ICD code for hypertension or at least 2 consecutive elevated BP within the last two years prior to cohort entry.<sup>31,32</sup> Elevated BP was included as  $\geq$ 130/80 and  $\geq$ 140/90, respectively, to comply with changes in hypertension guidelines over the course of the study period.<sup>33,34</sup>

Other clinical variables potentially related to diabetes incidence included: Blood Pressure (BP, excluding those measured in the hospital, emergency department, or at night); Lipids (Total Cholesterol, High Density Lipoprotein, Low Density Lipoprotein, and Triglycerides); Hepatic Transaminase Enzymes (serum aspartate aminotransferase - AST or SGOT - and alanine aminotransferase - ALT or SGPT); Renal Function (measured as Estimated Glomerular Filtration Rate - eGFR); Smoking Status: (Obtained from Health Factor files within CDW at cohort entry, classified as current, ever, or never smokers); and Agent Orange Exposure (Obtained from the number of veterans with Agent Orange listed as a health factor in the medical record).<sup>11</sup> Beside this select list, all documented diagnoses and treatments are available for the cohort.

### **Findings**

The total person-years (PY) for this national cohort with 6,082,246 veterans from all 50 states was 35,889,982 (median 5.5 PY, IQR: 2.6 - 9.8). As shown in **Table 1**, the mean age of the cohort

was 58 years at baseline, 36.4% were 65 or older, most were male (91.7%), more than two-thirds were non-Hispanic white (75.1%), 16.2% were non-Hispanic black, and 6.1% were Hispanic. The majority (55.2%) were married or living with a partner.

At baseline, the average Hgb A1C was 5.8% among the 40.7% of the cohort tested at entry, and of these, 41.5% had an Hgb A1C in the prediabetes range. The average weight was 196.9 pounds and average BMI was 28.8 (SD 5.4). At baseline, 40.6% were overweight and 36.1% were obese. Traditional clinical risk factors for diabetes were common in this cohort as 49.5% had hypertension, 44.1% had hyperlipidemia, and 42.6% were smokers. Other clinical risk factors for diabetes included ischemic heart disease (16.4%), peripheral vascular disease (4.2%), heart failure (3.0%), and chronic kidney disease (2.5%). Most of these risk factors were present at baseline at higher rates among those who developed diabetes compared with those who did not during cohort follow-up.

**Figure 2** shows the number of subjects in the cohort over time, from inception January 1, 2008 through December 31, 2018. Almost half (48.8%) of the cohort entered at cohort inception in January 1, 2008, with the remainder entering during the study period through December 31, 2016. During cohort follow-up, 936,627 (15.4%) veterans developed diabetes, for an incidence rate of 26 per 1,000 PY. Additionally, 518,503 (8.5%) were lost to follow-up, and 1,077,662 (17.7%) died during the study period. **Figure 3** shows the geographic distribution of the number of patients per tract. The majority of addresses were able to be geocoded (89%); of those not geocoded, about half were PO boxes, and the other half were missing. The majority of census tracts had between 20-80 patients.

Because cohort data were drawn from the VA EHR, which depends on documentation of services provided, some subjects had missing values for some variables at baseline. For example, the percentage of missing variables at cohort entry were: gender (<0.01%); race/ethnicity (10.1%); marital status (7.5%); BMI (4.3%); and Hgb A1C (59.3%). The missing race/ethnicity variable in VA data is widely known.<sup>35</sup> Screening for diabetes with Hgb A1c became more common after the recommendation was published in 2009.<sup>36</sup>

### Strengths and limitations

A primary strength of this national cohort is its large size and long-term follow-up. The cohort includes a comprehensive set of demographic, anthropomorphic, clinical, treatment, and other administrative variables, drawn from all inpatient and outpatient encounters, each of which are automatically updated over time. In addition to the select comorbidities identified in this paper, the cohort includes data related to all comorbidities. Future work will include calculation of a multi-morbidity index to measure the impact of medical history on emergence of diabetes.<sup>37</sup>

As the nation's largest, integrated healthcare system, the VA follows veterans across all VA facilities, even after moving and changing VA facilities or providers within the system. Additionally, data on veterans who are Medicare or Medicaid beneficiaries and seek health care outside of the VA will be included by merging the study cohort with data from the Centers for Medicare and Medicaid (CMS). Finally, home addresses are available and were geocoded in



1  
2  
3 order to study the effect of community level characteristics and the impact of moving over time  
4 on incident diabetes in future work using this cohort.  
5

6 The cohort has a few limitations. It relies on data documented during the course of clinical  
7 practice in EHRs and thus causal inferences face difficulties associated with unmeasured  
8 confounding, selection bias, and measurement error. Selection biases may arise as lower health  
9 care utilizers are more likely to be lost to follow-up or excluded, and higher utilizers may be  
10 more likely to meet criteria for key exposure and outcome variables. This is partially mitigated  
11 by the several-year, longitudinal follow-up.  
12  
13

14 The veteran population is predominantly male and white, and so the findings may not  
15 generalize to minorities or to women. Nonetheless, our large cohort ensures a sufficient and  
16 growing sample of women veterans (504,020) and patients from major ethnic/racial groups  
17 (886,150 NH black veterans, 331,376 Hispanic veterans), providing the ability to study diabetes  
18 incidence among these subgroups and improving the generalizability of our findings to non-  
19 veteran populations.  
20  
21  
22

### 23 **Patient and Public Involvement**

24 This cohort study was conducted without engagement or co-production by patients or the  
25 public.  
26  
27

### 28 **Contributorship statement**

29 Authors contributed equally to this work.  
30  
31

### 32 **Competing interests**

33 The authors report no competing interests.  
34  
35

### 36 **Funding**

37 This study was funded by the Centers for Disease Control and Prevention (5 U01DP006299-02-  
38 00; PI: LET).  
39  
40

### 41 **Data sharing statement**

42 To gain access to data from the diabetes cohort described in this profile, interested researchers  
43 can contact the corresponding author. Access to VA electronic health records is limited to  
44 researchers with active, VA appointments and have an IRB-approved protocol. The process for  
45 obtaining a VA appointment without compensation (WOC) can be lengthy and varies by region,  
46 depending on the VA office processing the application. Once a researcher has a VA  
47 appointment and has IRB approval, the VA has developed a comprehensive data infrastructure  
48 to support secure and remote access to data via the VINCI platform. Additionally, deidentified  
49 datasets can be established and shared with appropriate IRB approval and data use  
50 agreements.  
51  
52  
53

54 Further details  
55  
56  
57  
58  
59  
60

1  
2  
3 Further details regarding the ability to access VA data can be found on the VA website  
4 dedicated to researchers: [https://www.hsrd.research.va.gov/for\\_researchers/default.cfm](https://www.hsrd.research.va.gov/for_researchers/default.cfm),<sup>38</sup>  
5 including links to policies and guidance documents, special interest groups, funding  
6 opportunities, and a link to the VA Informatics and Computing Infrastructure (VINCI) site where  
7 access to actual data is granted once appropriate applications have been submitted and  
8 approved: [https://www.hsrd.research.va.gov/for\\_researchers/vinci/](https://www.hsrd.research.va.gov/for_researchers/vinci/).<sup>24</sup>  
9  
10  
11  
12  
13  
14  
15  
16  
17  
18  
19  
20  
21  
22  
23  
24  
25  
26  
27  
28  
29  
30  
31  
32  
33  
34  
35  
36  
37  
38  
39  
40  
41  
42  
43  
44  
45  
46  
47  
48  
49  
50  
51  
52  
53  
54  
55  
56  
57  
58  
59  
60

For peer review only

### Profile in a Nutshell

- The VA Diabetes Risk Cohort (VADR) includes all 6,082,246 veterans in the United States who were diabetes-free as of January 1, 2008, or who subsequently enrolled in the VA for primary care and were diabetes-free at cohort entry through December 31, 2016. Follow up is ongoing and is presented here through December 31, 2018.
- This is an ongoing, dynamic cohort enabled by the VA national electronic health record network, with passive data collection as it relies on routine medical information obtained from all inpatient and outpatient clinical encounters, updated daily.
- Subjects eligible for the cohort, either at baseline or afterwards, include all veterans who had at least 2 diabetes-free visits to a VA primary care service at least 30 days apart within any 5-year period since January 1, 2003. VA primary care clinics operate in 151 VA Medical Centers and more than 800 Community-Based Outpatient Clinics across the United States.
- The main outcome variable is incidence of type 2 diabetes, using a query-based definition comprised of at least two encounters with documentation of a diabetes ICD-9/10 code, or a documented prescription for a diabetes medication other than Metformin or Acarbose only; or at least one encounter with a diabetes ICD-9/10 code documented and two elevated ( $\geq 6.5\%$ ) glycosylated hemoglobin during the study period.
- The incidence rate of type 2 diabetes in this cohort of over 6 million veterans followed for a median of 5.5 years (over 35 million person-years) was 26 per 1000 person-years.
- During the study period, 8.5% of the cohort were lost to follow-up and 17.7% died.
- Many demographic, comorbidity, and other clinical variables were more prevalent among patients with incident diabetes.

**Table 1. Cohort demographics and clinical characteristics by incident diabetes status**

|                                    | All veterans <sup>^</sup><br>n (%) or mean (SD) | Veterans without<br>incidence diabetes †<br>n (%) or mean (SD) | Veterans with incident<br>diabetes<br>n (%) or mean (SD) |
|------------------------------------|-------------------------------------------------|----------------------------------------------------------------|----------------------------------------------------------|
| <b>Total</b>                       | 6,082,246                                       | 5,145,619                                                      | 936,627                                                  |
| <b>Demographic characteristics</b> |                                                 |                                                                |                                                          |
| <b>Age</b>                         | 58 (17)                                         | 53 (16.1)                                                      | 61 (12.2)                                                |
| <b>Age categories</b>              |                                                 |                                                                |                                                          |
| 18-34                              | 745,521 (12.3)                                  | 592,263 (16.7)                                                 | 21788 (2.3)                                              |
| 35-49                              | 1,009,704 (16.6)                                | 725,443 (20.4)                                                 | 130347 (13.9)                                            |
| 50-64                              | 2,114,320 (34.8)                                | 1,280,156 (36.1)                                               | 451975 (48.3)                                            |
| 65-79                              | 1,499,835 (24.7)                                | 786,222 (22.2)                                                 | 261601 (27.9)                                            |
| 80+                                | 712,733 (11.7)                                  | 165,266 (4.7)                                                  | 70904 (7.6)                                              |
| <b>Gender</b>                      |                                                 |                                                                |                                                          |
| Male                               | 5,578,056 (91.7)                                | 3,167,546 (89.2)                                               | 886789 (94.7)                                            |
| Female                             | 504,020 (8.3)                                   | 381,782 (10.8)                                                 | 49,818 (5.3)                                             |
| <b>Race ethnicity</b>              |                                                 |                                                                |                                                          |
| Non-Hispanic white                 | 4107,390 (75.1)                                 | 2,421,016 (74.2)                                               | 617020 (71.1)                                            |
| Non-Hispanic black                 | 886,150 (16.2)                                  | 542,362 (16.6)                                                 | 172580 (19.9)                                            |
| Hispanic                           | 331,376 (6.1)                                   | 211,268 (6.5)                                                  | 55245 (6.4)                                              |
| Non-Hispanic Asian                 | 55,209 (1)                                      | 37,208 (1.1)                                                   | 7732 (0.9)                                               |
| Non-Hispanic other                 | 86,270 (1.6)                                    | 52,698 (1.6)                                                   | 15218 (1.8)                                              |
| <b>Marital status</b>              |                                                 |                                                                |                                                          |
| Married or living with a partner   | 3,104,735 (55.2)                                | 1,833,115 (55.2)                                               | 477624 (56.2)                                            |
| Single                             | 2,523,397 (44.8)                                | 1,488,011 (44.8)                                               | 372,313 (43.8)                                           |
| <b>Clinical characteristics</b>    |                                                 |                                                                |                                                          |
| <b>HbA1c</b>                       | 5.8 (0.4)                                       | 5.6 (0.4)                                                      | 5.9 (0.3)                                                |
| Normal (<5.7%)                     | 1,311,814 (53)                                  | 875,704 (62.3)                                                 | 128685 (25.8)                                            |
| Prediabetes (5.7%-6.49%)           | 1,027,373 (41.5)                                | 514,771 (36.6)                                                 | 268,113 (53.8)                                           |
| Diabetes range (≥6.5%)             | 134,321 (5.4)                                   | 15,304 (1.1)                                                   | 101,749 (20.4)                                           |
| <b>Weight in pounds</b>            | 196.9 (40.7)                                    | 196.6 (38.9)                                                   | 214.8 (45.1)                                             |
| <b>BMI</b>                         | 28.8 (5.4)                                      | 28.7 (5.1)                                                     | 31.3 (6.0)                                               |
| Underweight (<18.5)                | 48,956 (0.8)                                    | 18,043 (0.5)                                                   | 4,417 (0.5)                                              |
| Normal weight (18.5-<25)           | 1,308,490 (22.5)                                | 732,446 (21.6)                                                 | 105,231 (11.7)                                           |

|    |                                                    |                  |                  |                |
|----|----------------------------------------------------|------------------|------------------|----------------|
| 1  |                                                    |                  |                  |                |
| 2  |                                                    |                  |                  |                |
| 3  | Overweight (25-<30)                                | 2,362,954 (40.6) | 1,441,766 (42.5) | 294,237 (32.6) |
| 4  | Obese (≥30)                                        | 2,101,515 (36.1) | 1,197,744 (35.3) | 499,091 (55.3) |
| 5  |                                                    |                  |                  |                |
| 6  |                                                    |                  |                  |                |
| 7  | <b>Measured blood pressure*</b>                    |                  |                  |                |
| 8  | Systolic blood pressure                            | 130 (14.7)       | 129 (14.2)       | 133 (14.9)     |
| 9  | Diastolic blood pressure                           | 76 (10.0)        | 77 (9.6)         | 78 (10.1)      |
| 10 |                                                    |                  |                  |                |
| 11 |                                                    |                  |                  |                |
| 12 | Elevated blood pressure (≥130/80)                  | 3,516,683 (60.7) | 2,011,677 (59.4) | 609,089 (67.9) |
| 13 | Elevated blood pressure (≥140/90)                  | 1,499,531 (25.9) | 796,643 (23.5)   | 287,673 (32.1) |
| 14 |                                                    |                  |                  |                |
| 15 |                                                    |                  |                  |                |
| 16 | <b>Hypertension</b>                                |                  |                  |                |
| 17 | ≥1ICD code or 2 consecutive elevated BP*           |                  |                  |                |
| 18 | (≥130/80)                                          | 3,774,345 (62.1) | 1,966,277 (38.2) | 721,080 (77.0) |
| 19 | ≥1ICD code or 2 consecutive elevated BP*           |                  |                  |                |
| 20 | (≥140/90)                                          | 3,153,815 (51.9) | 1,547,465 (30.1) | 646,090 (69.0) |
| 21 |                                                    |                  |                  |                |
| 22 |                                                    |                  |                  |                |
| 23 | <b>Lipids</b>                                      |                  |                  |                |
| 24 | Total cholesterol                                  | 185.5 (38.4)     | 188.3 (37.7)     | 185.4 (40.2)   |
| 25 | Triglyceride                                       | 140.8 (88.9)     | 137.6 (86.9)     | 168.1 (103.2)  |
| 26 | LDL                                                | 112.6 (33.1)     | 115.3 (32.8)     | 111.4 (34.1)   |
| 27 | HDL                                                | 46.3 (14.2)      | 47.3 (14.3)      | 42.4 (12.5)    |
| 28 |                                                    |                  |                  |                |
| 29 |                                                    |                  |                  |                |
| 30 | <b>Hyperlipidemia‡</b>                             | 2,681,776 (44.1) | 1,371,540 (38.6) | 528,320 (56.4) |
| 31 |                                                    |                  |                  |                |
| 32 |                                                    |                  |                  |                |
| 33 | <b>Smoking status</b>                              |                  |                  |                |
| 34 | Current smoker                                     | 948,387 (42.6)   | 562,038 (41.9)   | 140,356 (44.3) |
| 35 | Not a smoker                                       | 1,280,059 (57.4) | 780,210 (58.1)   | 176,812 (55.7) |
| 36 |                                                    |                  |                  |                |
| 37 |                                                    |                  |                  |                |
| 38 | <b>Estimated glomerular filtration rate (eGFR)</b> | 80.1 (18.3)      | 82.5 (16.7)      | 78.6 (18.4)    |
| 39 | eGFR≥90 (stage 1)                                  | 1,036,931 (30.8) | 691,985 (33.9)   | 145,396 (27.9) |
| 40 | eGFR ≥60 to <90 (stage 2)                          | 1,899,356 (56.5) | 1,180,801 (57.8) | 300,189 (57.6) |
| 41 | eGFR<60 (stage 3, 4, or 5)                         | 427,148 (12.7)   | 169,862 (8.3)    | 75,169 (14.4)  |
| 42 |                                                    |                  |                  |                |
| 43 |                                                    |                  |                  |                |
| 44 | <b>Chronic kidney disease (ICD codes)</b>          | 150,829 (2.5)    | 47,355 (0.9)     | 29,237 (3.1)   |
| 45 |                                                    |                  |                  |                |
| 46 | <b>Ischemic heart disease (ICD codes)</b>          | 999,988 (16.4)   | 378,843 (7.4)    | 209,455 (22.4) |
| 47 |                                                    |                  |                  |                |
| 48 | <b>Heart failure (ICD codes)</b>                   | 181,388 (3.0)    | 40,412 (0.8)     | 41,271 (4.4)   |
| 49 |                                                    |                  |                  |                |
| 50 |                                                    |                  |                  |                |
| 51 | <b>Peripheral vascular disease (ICD codes)</b>     | 256,074 (4.2)    | 77,343 (1.5)     | 55,244 (5.9)   |
| 52 |                                                    |                  |                  |                |
| 53 |                                                    |                  |                  |                |
| 54 | <b>Stroke (ICD codes)</b>                          | 30,424 (0.5)     | 10,724 (0.2)     | 6,275 (0.7)    |
| 55 |                                                    |                  |                  |                |
| 56 |                                                    |                  |                  |                |
| 57 |                                                    |                  |                  |                |
| 58 |                                                    |                  |                  |                |
| 59 |                                                    |                  |                  |                |
| 60 |                                                    |                  |                  |                |

|                                  |                |                |                |
|----------------------------------|----------------|----------------|----------------|
| <b>Agent orange exposure</b>     | 26,419 (0.4)   | 14,040 (0.3)   | 7,258 (0.8)    |
| <b>Chronic hepatitis C</b>       | 102,535 (1.7)  | 51,790 (1.0)   | 21,382 (2.3)   |
| <b>Hyperuricemia</b>             | 180,946 (3.0)  | 74,544 (1.4)   | 54,981 (5.9)   |
| <b>Polycystic ovary syndrome</b> | 4,994 (.0)     | 3,765 (1.0)    | 801 (1.6)      |
| <b>Gestational diabetes</b>      | 157 (0.03)     | 131 (0.03)     | 22 (0.04)      |
| <b>Liver enzymes</b>             |                |                |                |
| Abnormal AST                     | 25.8 (14.3)    | 25.7 (14.2)    | 26.7 (14.7)    |
| Abnormal ALT                     | 29.5 (19.8)    | 30.3 (19.9)    | 32.4 (21.1)    |
| Elevated AST                     | 277,607 (6.4)  | 156,503 (6.2)  | 56,466 (8.3)   |
| Elevated ALT                     | 778,953 (17.5) | 482,357 (18.6) | 158,752 (22.8) |
| <b>Fatty liver disease</b>       | 253,139 (10.4) | 136,850 (10.8) | 67,367 (15.7)  |

\* Only recent (within 2 years of cohort entry) BP measurements were used. Nighttime BP (8 PM to 7 AM) and BP measured in ER were excluded

‡ Hyperlipidemia was defined as: at least 2 ICD-9/10 codes for hyperlipidemia, total cholesterol > 240 mg/dL, or lipid lowering medication use

^ Including those lost to follow up and those died during the study period

† Only patients who completed the follow up and were diabetes free at the end of the study

## References

1. Centers for Disease Control and Prevention. *Estimates of Diabetes and its Burden in the United States*. Atlanta, GA: U.S. Department of Health and Human Services, Centers for Disease Control and Prevention, 2017;2017.
2. Centers for Disease Control and Prevention. *Underlying Cause of Death 1999-2008*. National Center for Health Statistics;2018.
3. American Diabetes Association. Economic costs of diabetes in the U.S. in 2012. *Diabetes care*. 2013;36(4):1033-1046.
4. Prevention CfDca. Diabetes Quick Facts. 2019; <https://www.cdc.gov/diabetes/basics/quick-facts.html>. Accessed February 27, 2020.
5. Veterans Health Administration. VA Research on Diabetes. 2019.
6. Liu Y, Sayam S, Shao X, et al. Prevalence of and Trends in Diabetes Among Veterans, United States, 2005-2014. *Preventing chronic disease*. 2017;14:E135.
7. Miller D, Safford M, Pogach L. Who has diabetes? Best estimates of diabetes prevalence in the Department of Veterans Affairs based on computerized patient data. *Diabetes care*. 2004;27 Suppl 2:B10-21.
8. Veterans Health Administration. Close to 25 Percent of VA Patients Have Diabetes. 2011; <http://www.va.gov/health/NewsFeatures/20111115a.asp> Accessed December 31, 2015.
9. Breland J, Phibbs C, Hoggatt K, et al. The Obesity Epidemic in the Veterans Health Administration: Prevalence Among Key Populations of Women and Men Veterans. *Journal of general internal medicine*. 2017;32(Suppl 1):11-17.
10. Kondo K, Low A, Everson T, et al. Health Disparities in Veterans: A Map of the Evidence. *Medical care*. 2017;55 Suppl 9 Suppl 2:S9-s15.
11. National Academies of Sciences E, and Medicine. *Veterans and Agent Orange*. National Academies Press;2018.
12. Prevention CfDca. *National Diabetes Prevention Program*. 2019.
13. Group DPPR, Knowler W, Fowler S, et al. 10-year follow-up of diabetes incidence and weight loss in the Diabetes Prevention Program Outcomes Study. *Lancet (London, England)*. 2009;374(9702):1677-1686.
14. Ackermann R, Finch E, Brizendine E, Zhou H, Marrero D. Translating the Diabetes Prevention Program into the community. The DEPLOY Pilot Study. *American journal of preventive medicine*. 2008;35(4):357-363.
15. Ackermann R, Marrero D. Adapting the Diabetes Prevention Program lifestyle intervention for delivery in the community: the YMCA model. *The Diabetes educator*. 2007;33(1):69, 74-65, 77-68.
16. Baker M, Simpson K, Lloyd B, Bauman A, Singh M. Behavioral strategies in diabetes prevention programs: a systematic review of randomized controlled trials. *Diabetes research and clinical practice*. 2011;91(1):1-12.
17. Schellenberg E, Dryden D, Vandermeer B, Ha C, Korownyk C. Lifestyle interventions for patients with and at risk for type 2 diabetes: a systematic review and meta-analysis. *Annals of internal medicine*. 2013;159(8):543-551.
18. Diabetes LEAD (Location, Environmental Attributes, and Disparities) Network. <http://diabetesleadnetwork.org/>. Accessed February 27, 2020.
19. Administration VH. About VHA. <https://www.va.gov/health/aboutvha.asp>. Accessed February 27, 2020.

- 1
  - 2
  - 3
  - 4
  - 5
  - 6
  - 7
  - 8
  - 9
  - 10
  - 11
  - 12
  - 13
  - 14
  - 15
  - 16
  - 17
  - 18
  - 19
  - 20
  - 21
  - 22
  - 23
  - 24
  - 25
  - 26
  - 27
  - 28
  - 29
  - 30
  - 31
  - 32
  - 33
  - 34
  - 35
  - 36
  - 37
  - 38
  - 39
  - 40
  - 41
  - 42
  - 43
  - 44
  - 45
  - 46
  - 47
  - 48
  - 49
  - 50
  - 51
  - 52
  - 53
  - 54
  - 55
  - 56
  - 57
  - 58
  - 59
  - 60
20. Bowe B, Xie Y, Li T, Yan Y, Xian H, Al-Aly Z. The 2016 global and national burden of diabetes mellitus attributable to PM2.5 air pollution. *The Lancet Planetary health*. 2018;2(7):e301-e312.
21. Davis PJ, Liu M, Sherman S, et al. HbA1c, lipid profiles and risk of incident type 2 Diabetes in United States Veterans. *PLoS one*. 2018;13(9):e0203484.
22. Tseng E, Yeh HC, Maruthur NM. Metformin Use in Prediabetes Among U.S. Adults, 2005-2012. *Diabetes care*. 2017;40(7):887-893.
23. Hu R, Li Y, Lv Q, Wu T, Tong N. Acarbose Monotherapy and Type 2 Diabetes Prevention in Eastern and Western Prediabetes: An Ethnicity-specific Meta-analysis. *Clinical therapeutics*. 2015;37(8):1798-1812.
24. Affairs DoV. VA Informatics and Computing Infrastructure (VINCI). 2015; [http://www.hsrd.research.va.gov/for\\_researchers/vinci/](http://www.hsrd.research.va.gov/for_researchers/vinci/). Accessed February 27, 2020.
25. Casey J, Schwartz B, Stewart W, Adler N. Using Electronic Health Records for Population Health Research: A Review of Methods and Applications. *Annual review of public health*. 2016;37:61-81.
26. ArcGIS: The mapping and analytics platform. <https://www.esri.com/en-us/arcgis/about-arcgis/overview>.
27. Python. <https://www.python.org/>.
28. QGIS.
29. NHLBI N. Classification of Overweight and Obesity by BMI, Waist Circumference, and Associated Disease Risks. [https://www.nhlbi.nih.gov/health/educational/lose\\_wt/BMI/bmi\\_dis.htm](https://www.nhlbi.nih.gov/health/educational/lose_wt/BMI/bmi_dis.htm). Accessed February 27, 2020.
30. Soohoo M, Moradi H, Obi Y, Kovesdy CP, Kalantar-Zadeh K, Streja E. Serum triglycerides and mortality risk across stages of chronic kidney disease in 2 million U.S. veterans. *Journal of clinical lipidology*. 2019;13(5):744-753.e715.
31. Burg MM, Brandt C, Buta E, et al. Risk for Incident Hypertension Associated With Posttraumatic Stress Disorder in Military Veterans and the Effect of Posttraumatic Stress Disorder Treatment. *Psychosomatic medicine*. 2017;79(2):181-188.
32. Peng M, Chen G, Kaplan GG, et al. Methods of defining hypertension in electronic medical records: validation against national survey data. *Journal of public health (Oxford, England)*. 2016;38(3):e392-e399.
33. Rowan CG, Turner JR, Shah A, Spaeder JA. Antihypertensive treatment and blood pressure control relative to hypertension treatment guidelines. *Pharmacoepidemiology and drug safety*. 2014;23(12):1294-1302.
34. Armstrong C. JNC8 guidelines for the management of hypertension in adults. *American family physician*. 2014;90(7):503-504.
35. Hernandez S, Sylling P, Mor M, et al. Developing an Algorithm for Combining Race and Ethnicity Data Sources in the Veterans Health Administration. *Military medicine*. 2019.
36. Gillett M. International Expert Committee report on the role of the A1C assay in the diagnosis of diabetes. *Diabetes care*. 2009;32(7):1327-1334.
37. Alemi F, Levy C, Kheirbek R. The Multimorbidity Index: A Tool for Assessing the Prognosis of Patients from Their History of Illness. *EGEMS (Wash DC)*. 2016;4(1):1235-1235.
38. Affairs DoV. Health Services Research & Development. [https://www.hsrd.research.va.gov/for\\_researchers/default.cfm](https://www.hsrd.research.va.gov/for_researchers/default.cfm). Accessed February 27, 2020.



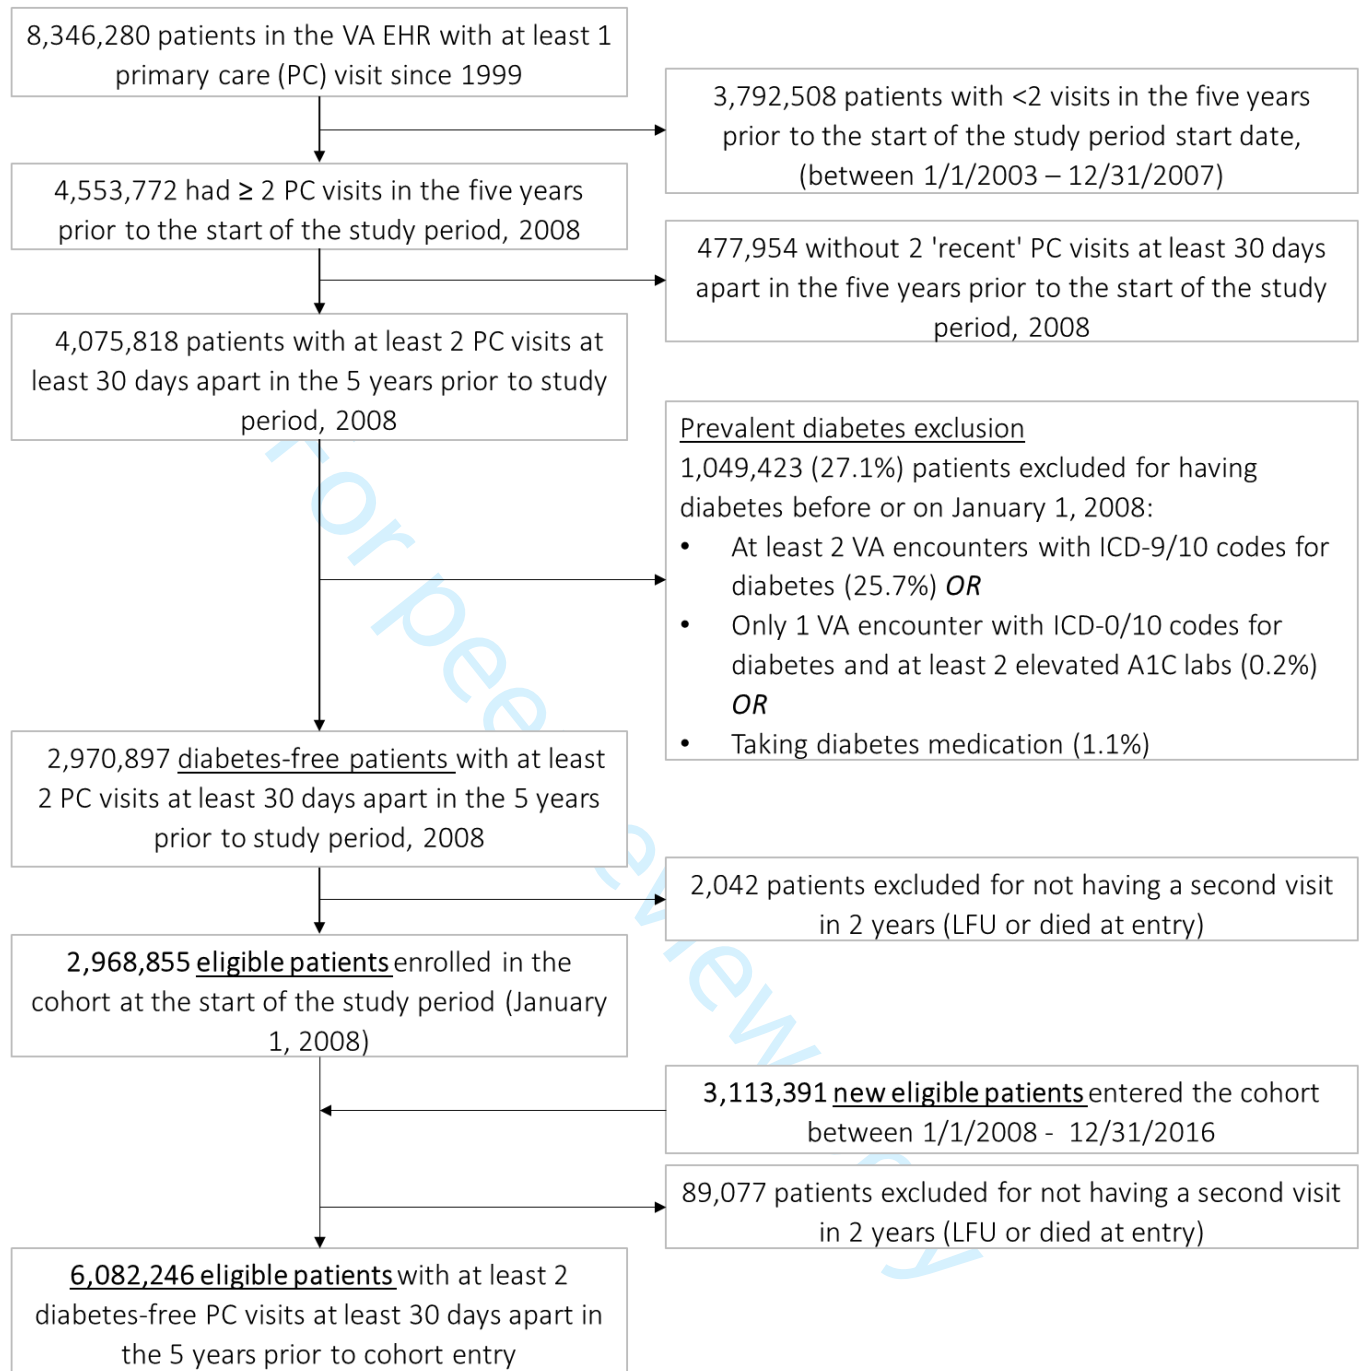

\* Patients with unreliable information on date of birth and date of death and patients with year of birth <1900 were excluded (n=2,248)

1  
2  
3  
4  
5  
6  
7  
8  
9  
10  
11  
12  
13  
14  
15  
16  
17  
18  
19  
20  
21  
22  
23  
24  
25  
26  
27  
28  
29  
30  
31  
32  
33  
34  
35  
36  
37  
38  
39  
40  
41  
42  
43  
44  
45  
46  
47  
48  
49  
50  
51  
52  
53  
54  
55  
56  
57  
58  
59  
60

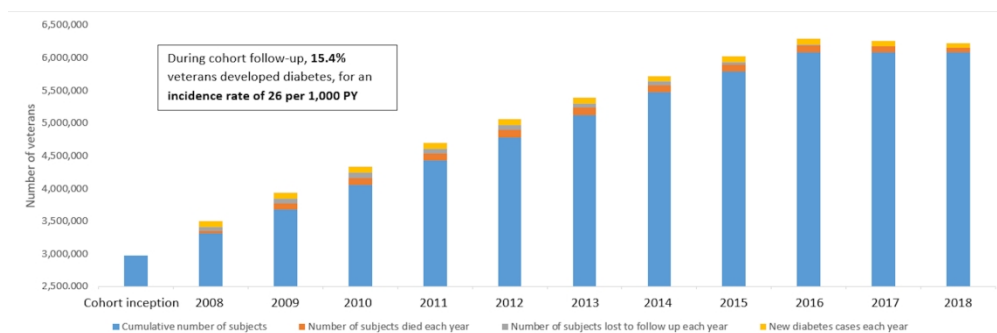

Figure 2. Cohort Trends, with cumulative numbers and percentage of patients, 2008 through 2018

1  
2  
3  
4  
5  
6  
7  
8  
9  
10  
11  
12  
13  
14  
15  
16  
17  
18  
19  
20  
21  
22  
23  
24  
25  
26  
27  
28  
29  
30  
31  
32  
33  
34  
35  
36  
37  
38  
39  
40  
41  
42  
43  
44  
45  
46  
47  
48  
49  
50  
51  
52  
53  
54  
55  
56  
57  
58  
59  
60

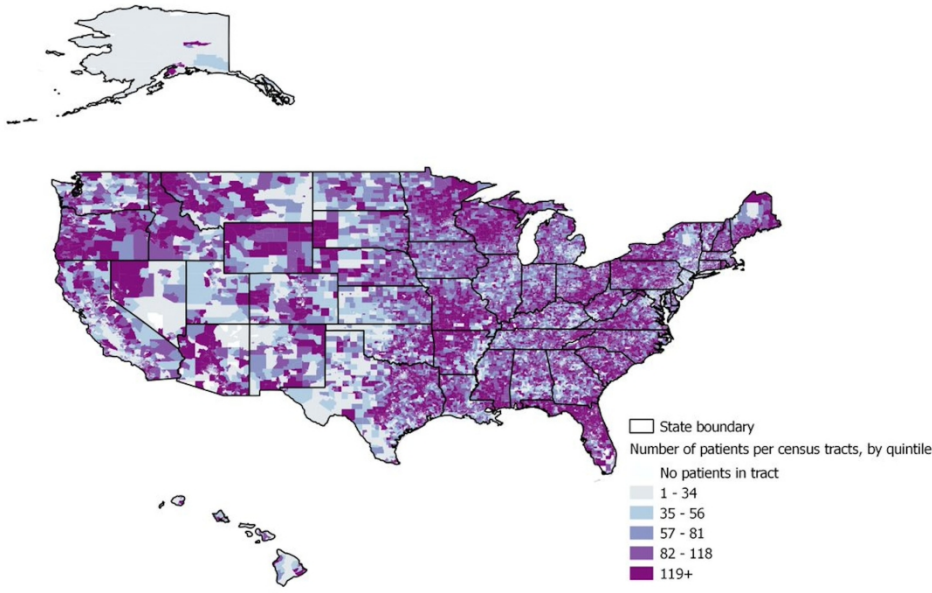

Figure 3. Geographic distribution of VADR Cohort  
179x127mm (300 x 300 DPI)

|                                                                                                                                                                                                                                                                               |                                                                                                                                                                                                                                                                                                                                                                                                                                                                                                                                                                                                                                                                                                                                                                                                                                                                                                                                                            | Details                                                                                                                                                                                                                                   |                                                                                                                                                                                                                                                                                                                                                                                                                                                                                                                                                                                                                                                                                                                                                                               |                                                                                                                                                  |                                                                                                                                                                                                                                                 |       |
|-------------------------------------------------------------------------------------------------------------------------------------------------------------------------------------------------------------------------------------------------------------------------------|------------------------------------------------------------------------------------------------------------------------------------------------------------------------------------------------------------------------------------------------------------------------------------------------------------------------------------------------------------------------------------------------------------------------------------------------------------------------------------------------------------------------------------------------------------------------------------------------------------------------------------------------------------------------------------------------------------------------------------------------------------------------------------------------------------------------------------------------------------------------------------------------------------------------------------------------------------|-------------------------------------------------------------------------------------------------------------------------------------------------------------------------------------------------------------------------------------------|-------------------------------------------------------------------------------------------------------------------------------------------------------------------------------------------------------------------------------------------------------------------------------------------------------------------------------------------------------------------------------------------------------------------------------------------------------------------------------------------------------------------------------------------------------------------------------------------------------------------------------------------------------------------------------------------------------------------------------------------------------------------------------|--------------------------------------------------------------------------------------------------------------------------------------------------|-------------------------------------------------------------------------------------------------------------------------------------------------------------------------------------------------------------------------------------------------|-------|
| Component                                                                                                                                                                                                                                                                     | Definition                                                                                                                                                                                                                                                                                                                                                                                                                                                                                                                                                                                                                                                                                                                                                                                                                                                                                                                                                 | ICD codes                                                                                                                                                                                                                                 |                                                                                                                                                                                                                                                                                                                                                                                                                                                                                                                                                                                                                                                                                                                                                                               | Labs                                                                                                                                             | Medications*                                                                                                                                                                                                                                    | Other |
|                                                                                                                                                                                                                                                                               |                                                                                                                                                                                                                                                                                                                                                                                                                                                                                                                                                                                                                                                                                                                                                                                                                                                                                                                                                            | ICD-9                                                                                                                                                                                                                                     | ICD-10                                                                                                                                                                                                                                                                                                                                                                                                                                                                                                                                                                                                                                                                                                                                                                        |                                                                                                                                                  |                                                                                                                                                                                                                                                 |       |
| 1<br>2<br>3<br>4<br>5<br>6<br>7<br>8<br>9<br>10<br>11<br>12<br>13<br>14<br>15<br>16<br>17<br>18<br>19<br>20<br>21<br>22<br>23<br>24<br>25<br>26<br>27<br>28<br>29<br>30<br>31<br>32<br>33<br>34<br>35<br>36<br>37<br>38<br>39<br>40<br>41<br>42<br>43<br>44<br>45<br>46<br>47 | <p>(1) At least two encounters (inpatient or outpatient) with documentation of a Type 2 diabetes ICD-9/10 code (ICD-9: 250.x; ICD-10: E11.x), <b>or</b></p> <p>(2) a documented prescription for a diabetes medication other than metformin or acarbose alone, <b>or</b></p> <p>(3) at least one encounter with a diabetes ICD-9/10 code and <b>two elevated</b> (glycosylated hemoglobin (Hgb A1C) lab test results</p> <ul style="list-style-type: none"> <li>• Implausible A1C labs removed (range based on NHANES reporting)</li> <li>• Multiple labs measured on the same day or on the same day and time were averaged if they ranged within 1%</li> <li>• A1C labs ranging &gt;1% were removed</li> <li>• If only one A1C lab was available prior to cohort entry date, that lab was used.</li> <li>• If more than one A1C lab was available, the average of the last two was taken</li> </ul> <p><b>Type 2 Diabetes Mellitus<sup>1-4</sup></b></p> | 250, 250.0, 250.00, 250.02, 250.1, 250.10, 250.12, 250.2, 250.20, 250.22, 250.3, 250.30, 250.32, 250.4, 250.40, 250.42, 250.5, 250.50, 250.52, 250.6, 250.60, 250.62, 250.7, 250.70, 250.72, 250.8, 250.80, 250.82, 250.9, 250.90, 250.92 | E11.00, E11.01, E11.21, E11.22, E11.29, E11.311, E11.319, E11.321, E11.3211, E11.3212, E11.3213, E11.3219, E11.329, E11.3291, E11.3292, E11.3293, E11.3299, E11.331, E11.3311, E11.3312, E11.3313, E11.3319, E11.339, E11.3391, E11.3392, E11.3393, E11.3399, E11.341, E11.3411, E11.3412, E11.3413, E11.3419, E11.349, E11.3491, E11.3492, E11.3493, E11.3499, E11.351, E11.3511, E11.3512, E11.3513, E11.3519, E11.352, E11.3521, E11.3522, E11.3523, E11.3529, E11.353, E11.3531, E11.3532, E11.3533, E11.3539, E11.354, E11.3541, E11.3542, E11.3543, E11.3549, E11.355, E11.3551, E11.3552, E11.3553, E11.3559, E11.359, E11.3591, E11.3592, E11.3593, E11.3599, E11.36, E11.37, E11.37X1, E11.37X2, E11.37X3, E11.37X9, E11.39, E11.40, E11.41, E11.42, E11.43, E11.44, | LOINC code corresponding to A1C:<br><ul style="list-style-type: none"> <li>• 17855-8</li> <li>17856-6</li> <li>4548-4</li> <li>4549-2</li> </ul> | Chloropropamide, glipizide, glyburide, glimepiride, metformin, repaglinide, nateglinide, tosiglitazone, pioglitazone, sitagliptin, saxagliptin, linagliptin, alogliptin, canagliflozin, dapagliflozin, acarbose, meglitol, colesevelam, insulin |       |

1  
2  
3  
4  
5  
6  
7  
8  
9  
10  
11  
12  
13  
14  
15  
16  
17  
18  
19  
20  
21  
22  
23  
24  
25  
26  
27  
28  
29  
30  
31  
32  
33  
34  
35  
36  
37  
38  
39  
40  
41  
42  
43  
44  
45  
46  
47

E11.49, E11.51, E11.52,  
E11.59, E11.610,  
E11.618, E11.620,  
E11.621, E11.622,  
E11.628, E11.630,  
E11.638, E11.641,  
E11.649, E11.65,  
E11.69, E11.8, E11.9

**Comorbidities**

A1C<sup>4-10</sup>

(1) Mean and standard deviation calculated after identifying labs using LOINC codes

- Implausible A1C labs removed (range based on NHANES reporting)
- Multiple labs measured on the same day or on the same day and time were averaged if they ranged within 1%
- A1C labs ranging >1% were removed
- If only one A1C lab was available prior to cohort entry date, that lab was used.
- If more than one A1C lab was available, the average of the last two was taken

LOINC code corresponding to A1C:

- 17855-8
- 17856-6
- 4548-4
- 4549-2

BMI<sup>11-14</sup>

(1) Calculated as weight (Kg)/[height(m)]<sup>2</sup>. Normal weight defined as BMI < 25, **O v e r w e i g h t d e f** < 3 0 , a n d **O b e s e**

Height:

- Implausible values removed (range based on published literature)

Obtained by vital signs records

- Multiple heights recorded during the same visit were averaged if they ranged within 3 inches (7.62 cm) or less
- Measurements ranging more than 3 inches were deleted
- If only one height measurement was available prior to cohort entry date, that height was used
- If more than one height measurement was available prior to cohort entry date, the average of the last two was taken

Weight:

- Implausible values removed (range based on published literature)
- Multiple weights recorded during the same visit were averaged if they ranged within 10 lb (4.536 Kg) or less. Measurements ranging more than 10 lb were deleted
- If only one weight measurement was available prior to cohort entry date, that weight was used
- If more than one weight measurement was available prior to cohort entry date, the average of the last two was taken

For peer review only

1  
2  
3  
4  
5  
6  
7  
8  
9  
10  
11  
12  
13  
14  
15  
16  
17  
18  
19  
20  
21  
22  
23  
24  
25  
26  
27  
28  
29  
30  
31  
32  
33  
34  
35  
36  
37  
38  
39  
40  
41  
42  
43  
44  
45  
46  
47

|                                      |                                                                         |   |   |   |   |                                 |
|--------------------------------------|-------------------------------------------------------------------------|---|---|---|---|---------------------------------|
| Blood Pressure (BP) <sup>15-19</sup> | (1) Mean and standard deviation of systolic and diastolic BP calculated | - | - | - | - | Obtained by vital signs records |
|--------------------------------------|-------------------------------------------------------------------------|---|---|---|---|---------------------------------|

1  
2  
3  
4  
5  
6  
7  
8  
9  
10  
11  
12  
13  
14  
15  
16  
17  
18  
19  
20  
21  
22  
23  
24  
25  
26  
27  
28  
29  
30  
31  
32  
33  
34  
35  
36  
37  
38  
39  
40  
41  
42  
43  
44  
45  
46  
47

|                                     |                                                                                                                                                                                                                                                                                                                                                                                                                                                                                                                                                                 |                                                                      |                                                                                                                                                           |                                                                                                                                  |                                                                                                                                                                                                                                                                                                                           |
|-------------------------------------|-----------------------------------------------------------------------------------------------------------------------------------------------------------------------------------------------------------------------------------------------------------------------------------------------------------------------------------------------------------------------------------------------------------------------------------------------------------------------------------------------------------------------------------------------------------------|----------------------------------------------------------------------|-----------------------------------------------------------------------------------------------------------------------------------------------------------|----------------------------------------------------------------------------------------------------------------------------------|---------------------------------------------------------------------------------------------------------------------------------------------------------------------------------------------------------------------------------------------------------------------------------------------------------------------------|
|                                     | <ul style="list-style-type: none"> <li>Records deleted if measured at nighttime (8pm to 7am) or if diastolic BP was greater than systolic BP</li> <li>Only BP measured within the 2 years prior to cohort entry was included</li> <li>BP measured on the same day was averaged</li> <li>If only one BP measured was available on, or prior to, cohort entry date, it was used as the baseline BP</li> <li>If more than one BP was available on, or prior to, cohort entry date, the average of the last two measurements was used as the baseline BP</li> </ul> |                                                                      |                                                                                                                                                           |                                                                                                                                  |                                                                                                                                                                                                                                                                                                                           |
| Hypertension (HTN) <sup>20-24</sup> | (1) At least one ICD-9/10 code for HTN                                                                                                                                                                                                                                                                                                                                                                                                                                                                                                                          | 401.0, 401.1, 401.9                                                  | I10.X                                                                                                                                                     | -                                                                                                                                | -                                                                                                                                                                                                                                                                                                                         |
| Hyperlipidemia <sup>25,26</sup>     | <p>(1) Elevated total cholesterol (&gt;240 mg/dL), <i>or</i></p> <p>(2) Lipid-lowering medication use, <i>or</i></p> <p>(3) at least 2 ICD-9/10 codes documenting hyperlipidemia</p>                                                                                                                                                                                                                                                                                                                                                                            | 272.0, 272.1, 272.2, 272.3, 272.4, 272.5, 272.6, 272.7, 272.8, 272.9 | E78, E78.0, E78.00, E78.01, E78.1, E78.2, E78.3, E78.4, E78.41, E78.49, E78.5, E78.6, E78.7, E78.70, E78.71, E78.72, E78.79, E78.8, E78.81, E78.89, E78.9 | LOINC code corresponding to <u>Total cholesterol</u> : <ul style="list-style-type: none"> <li>2093-3</li> <li>14647-2</li> </ul> | Generic names for class "CV350": <ul style="list-style-type: none"> <li>Atorvastatin</li> <li>Cholestyramin</li> <li>Colestipol</li> <li>Ezetimibe</li> <li>Ezetimibe/Simvastatin</li> <li>Gemfibrozil</li> <li>Lomitapide</li> <li>Mipomerson</li> <li>Pravastatin</li> <li>Rosuvastatin</li> <li>Simvastatin</li> </ul> |

|                                                                                                                                           |                                                    |                                                                                                                                                                                                                                                                                                                                                                                                                                                                                                                                                                                                                                                                 |                                                                                                                     |                                          |                                                                                                                                                                                                                                                                                                                                                                                                                                                                              |   |   |
|-------------------------------------------------------------------------------------------------------------------------------------------|----------------------------------------------------|-----------------------------------------------------------------------------------------------------------------------------------------------------------------------------------------------------------------------------------------------------------------------------------------------------------------------------------------------------------------------------------------------------------------------------------------------------------------------------------------------------------------------------------------------------------------------------------------------------------------------------------------------------------------|---------------------------------------------------------------------------------------------------------------------|------------------------------------------|------------------------------------------------------------------------------------------------------------------------------------------------------------------------------------------------------------------------------------------------------------------------------------------------------------------------------------------------------------------------------------------------------------------------------------------------------------------------------|---|---|
| 1<br>2<br>3<br>4<br>5<br>6<br>7<br>8<br>9<br>10<br>11<br>12<br>13<br>14<br>15<br>16<br>17<br>18<br>19<br>20<br>21<br>22<br>23<br>24<br>25 | Lipids (HDL, LDL, Triglycerides) <sup>25-27</sup>  | (1) Mean and standard deviation calculated after identifying labs using LOINC codes <ul style="list-style-type: none"> <li>• Implausible values removed (range based on NHANES reporting)</li> <li>• The median of different lab values completed at the same day was taken</li> <li>• Lab values that are 50% &gt; or &lt; the median were considered outliers and removed</li> <li>• The median of the rest of the labs was taken as the lab value for that day</li> <li>• For all, if only one lab was available prior to the cohort entry date, that lab was used. If more than 1 lab value was available, the average of the last two was taken</li> </ul> | -                                                                                                                   | -                                        | LOINC codes corresponding to:<br><u>HDL:</u> <ul style="list-style-type: none"> <li>• 2085-9</li> <li>• 18263-4</li> <li>• 9832-7</li> </ul> <u>LDL:</u> <ul style="list-style-type: none"> <li>• 13457-7</li> <li>• 18262-6</li> <li>• 2089-1</li> <li>• 14155-6</li> </ul> <u>Triglycerides:</u> <ul style="list-style-type: none"> <li>• 2571-8</li> <li>• 14927-8</li> <li>• 12228-3</li> <li>• 3049-4</li> <li>• 1644-4</li> <li>• 12951-0</li> <li>• 3048-6</li> </ul> | - | - |
| 26<br>27                                                                                                                                  | Chronic Kidney Disease (CKD) <sup>24,28,29</sup>   | (1) At least one ICD-9/10 code documenting CKD                                                                                                                                                                                                                                                                                                                                                                                                                                                                                                                                                                                                                  | 585.5X                                                                                                              | N18.X                                    | -                                                                                                                                                                                                                                                                                                                                                                                                                                                                            | - | - |
| 28<br>29<br>30                                                                                                                            | Ischemic Heart Disease <sup>30</sup>               | (1) At least one ICD-9/10 code documenting ischemic heart disease                                                                                                                                                                                                                                                                                                                                                                                                                                                                                                                                                                                               | 410.X, 411.X, 412.X, 413.X, 414.X                                                                                   | I20.X, I21.X, I22.X, I23.X, I24.X, I25.X | -                                                                                                                                                                                                                                                                                                                                                                                                                                                                            | - | - |
| 31<br>32                                                                                                                                  | Heart Failure <sup>30,31</sup>                     | (1) At least one ICD-9/10 code documenting heart failure                                                                                                                                                                                                                                                                                                                                                                                                                                                                                                                                                                                                        | 428.X                                                                                                               | I50.X                                    | -                                                                                                                                                                                                                                                                                                                                                                                                                                                                            | - | - |
| 33<br>34<br>35<br>36<br>37<br>38                                                                                                          | Peripheral Vascular Disease (PVD) <sup>30,31</sup> | (1) At least one ICD-9/10 code documenting PVD                                                                                                                                                                                                                                                                                                                                                                                                                                                                                                                                                                                                                  | 440.0, 440.1, 440.2, 440.20, 440.21, 440.22, 440.23, 440.29, 440.4, 440.8, 440.9, 443.9, 557.0, 557.1, 557.9        | I73.X                                    | -                                                                                                                                                                                                                                                                                                                                                                                                                                                                            | - | - |
| 39<br>40<br>41<br>42<br>43<br>44<br>45                                                                                                    | Stroke                                             | (1) At least one ICD-9/10 code documenting stroke                                                                                                                                                                                                                                                                                                                                                                                                                                                                                                                                                                                                               | 346.60, 346.61, 346.62, 346.63, 432.0, 432.1, 432.9, 433.01, 433.11, 433.21, 433.31, 433.81, 433.91, 434.0, 434.00, | I63.X                                    | -                                                                                                                                                                                                                                                                                                                                                                                                                                                                            | - | - |



|   |                           |                                                                                                                                                                                                                                                                                                                                                                                                                                                                                                                                                                                                                                                                             |                |                |                                                                                                                                     |                            |
|---|---------------------------|-----------------------------------------------------------------------------------------------------------------------------------------------------------------------------------------------------------------------------------------------------------------------------------------------------------------------------------------------------------------------------------------------------------------------------------------------------------------------------------------------------------------------------------------------------------------------------------------------------------------------------------------------------------------------------|----------------|----------------|-------------------------------------------------------------------------------------------------------------------------------------|----------------------------|
| 1 |                           | 434.11, 434.9, 434.90, 434.91, 436.5, 430.X, 431.X                                                                                                                                                                                                                                                                                                                                                                                                                                                                                                                                                                                                                          |                |                |                                                                                                                                     |                            |
| 2 | Agent Orange              | (1) "Agent orange" flag was used to generate the number of people with this exposure                                                                                                                                                                                                                                                                                                                                                                                                                                                                                                                                                                                        | -              | -              | -                                                                                                                                   | From patient problem lists |
| 3 | Hepatitis C               | (1) At least one ICD-9/10 code documenting Hepatitis C                                                                                                                                                                                                                                                                                                                                                                                                                                                                                                                                                                                                                      | 070.54         | B18.2          | -                                                                                                                                   | -                          |
| 4 | Hyperuricemia             | (1) At least one ICD-9/10 code documenting Hyperuricemia                                                                                                                                                                                                                                                                                                                                                                                                                                                                                                                                                                                                                    | 790.6          | E79.0          | -                                                                                                                                   | -                          |
| 5 | Polycystic Ovary Syndrome | (1) At least one ICD-9/10 code documenting Polycystic Ovary Syndrome                                                                                                                                                                                                                                                                                                                                                                                                                                                                                                                                                                                                        | 256.4          | E28.2          | -                                                                                                                                   | -                          |
| 6 | Gestational Diabetes      | (1) At least one ICD-9/10 code documenting Gestational Diabetes                                                                                                                                                                                                                                                                                                                                                                                                                                                                                                                                                                                                             | V12.21, 648.83 | Z86.32, 024.4X | -                                                                                                                                   | -                          |
| 7 | eGFR <sup>32,33</sup>     | (1) Mean and standard deviation calculated after identifying labs using LOINC codes <ul style="list-style-type: none"> <li>• Implausible eGFR values were excluded</li> <li>• The median of eGFR measured on the same day was taken, then values more than 50% different than the median were excluded as outliers</li> <li>• The median of the rest of the measures was taken as eGFR for that day</li> <li>• If only one eGFR was available prior to cohort entry date, it was taken as the baseline estimate</li> <li>• If more than one eGFR was available prior to cohort entry date, the average of the most recent two was taken as the baseline estimate</li> </ul> | -              | -              | LOINC code corresponding to eGFR: <ul style="list-style-type: none"> <li>• 62238-1</li> <li>• 48643-1</li> <li>• 33914-3</li> </ul> | -                          |

(1) Mean and standard deviation calculated after identifying labs using LOINC codes

- Implausible values removed (range based on NHANES reporting)
- The median of different lab values completed at the same day was taken
- Lab values that are 50% > or < the median were considered outliers and removed
- The median of the rest of the labs was taken as the lab value for that day

For all, if only one lab was available prior to the cohort entry date, that lab was used. If more than 1 lab value was available, the average of the last two was taken

Liver enzymes

LOINC codes corresponding to

AST:

- 14409-7
- 14410-5
- 43822-6
- 88112-8
- 14412-1
- 14414-7
- 16412-9
- 1918-2
- 27344-1
- 14413-9
- 1917-4
- 1919-0
- 1920-8
- 30239-8
- 14411-3
- 44786-2

ALT:

- 1741-8
- 25302-1
- 54491-6
- 1742-6
- 1743-4
- 44785-4
- 16324-6
- 50168-4
- 76625-3
- 1744-2
- 54492-4
- 77144-4

Exclusions:

- Patients with hepatitis B and C (ICD-9: 070.2x, 070.3x, 070.41, 070.44, 070.51, 070.51, 070.54, 070.7x. ICD-10: B18.x)

- alcohol abuse (ICD-9: 291.x, 303.0x, 303.9x, 305.0x. ICD-10 F10.x)

- patients with other rare liver disease (ICD-9: 576.1, 275.03, 275.01, 275.1, 237.4, 571.42, 571.6, 275.09. ICD-10: 237.4, D44.0, D44.2, D44.9, 275.01, E83.110, 275.03, E83.118, E83.119, 275.09, E83.10, E83.19, 275.1, E83.00, E83.01, E83.09, 571.42, K75.4, 571.6, K74.3, K74.4, K74.5, 576.1, K83.0)

At least 2 elevated ALT ( 40 U/L) at least 6 months apart within 2 years

1  
2  
3  
4  
5  
6  
7  
8  
9  
10  
11  
12  
13  
14  
15  
16  
17  
18  
19  
20  
21  
22  
23  
24  
25  
26  
27  
28  
29  
30  
31  
32  
33  
34  
35

Fatty liver disease<sup>34</sup>

For peer review only

Exclusions:  
  
- Patients with hepatitis B and C (ICD-9: 070.2x, 070.3x, 070.41, 070.44, 070.51, 070.51, 070.54, 070.7x. ICD-10: B18.x)  
  
- alcohol abuse (ICD-9: 291.x, 303.0x, 303.9x, 305.0x. ICD-10 F10.x)  
  
- patients with other rare liver disease (ICD-9: 576.1, 275.03, 275.01, 275.1, 237.4, 571.42, 571.6, 275.09. ICD-10: 237.4, D44.0, D44.2, D44.9, 275.01, E83.110, 275.03, E83.118, E83.119, 275.09, E83.10, E83.19, 275.1, E83.00, E83.01, E83.09, 571.42, K75.4, 571.6, K74.3, K74.4, K74.5, 576.1, K83.0

36 Medications are documented prescriptions, not prescriptions filled

37  
38  
39  
40  
41  
42  
43  
44  
45  
46  
47

References

Jones CD, Greenwood RH, Misra A, Bachmann MO. Incidence and progression of diabetic retinopathy during 17 years of a population-based screening program in England. *Diabetes care*. 2012;35(3):592-596.  
Parikh SV, Saya S, Divanji P, et al. Risk of death and myocardial infarction in patients with peripheral arterial disease undergoing percutaneous coronary intervention (from the National Heart, Lung and Blood Institute Dynamic Registry). *The American journal of cardiology*. 2011;107(7):959-964.

3. Rassen JA, Bartels DB, Schneeweiss S, Patrick AR, Murk W. Measuring prevalence and incidence of chronic conditions in claims and electronic health record databases. *Clinical epidemiology*. 2019;11:1-15.
14. Carls G, Huynh J, Tuttle E, Yee J, Edelman SV. Achievement of Glycated Hemoglobin Goals in the US Remains Unchanged Through 2014. *Diabetes Ther*. 2017;8(4):863-873.
35. Pani LN, Korenda L, Meigs JB, et al. Effect of aging on A1C levels in individuals without diabetes: evidence from the Framingham Offspring Study and the National Health and Nutrition Examination Survey 2001-2004. *Diabetes care*. 2008;31(10):1991-1996.
56. Nicolo M, Boullata JI. Serum 25OHD concentration as a predictor of haemoglobin A1c among adults living in the USA: NHANES 2003 to 2010. *BMJ Nutrition, Prevention & Health*. 2019:bmjnph-2019-000029.
77. Davis PJ, Liu M, Sherman S, et al. HbA1c, lipid profiles and risk of incident type 2 Diabetes in United States Veterans. *PLoS one*. 2018;13(9):e0203484.
88. Gillett M. International Expert Committee report on the role of the A1C assay in the diagnosis of diabetes. *Diabetes care*. 2009;32(7):1327-1334.
99. **Laboratory Procedure Manual: Glycohemoglobin**
110. Heinemann LF, G. Quality of HbA1c measurement in the practice: The German perspective. *J Diabetes Science and Technology*. 2015;9(3):687-695.
121. Fryar CK-M, D; Gu, Q; Ogden, CL. Mean body weight, height, waist circumference, and body mass index among adults: United States, 1999-2000 through 2015-2016. *National Health Statistics Reports*. 2018;122.
142. McDowell M, Hughes J, Borrud LG. Health characteristics of U.S. adults by body mass index category: results from NHANES 1999-2002. *Public Health Rep*. 2006;121(1):67-73.
163. Martinez K, Tucker L, Bailey B, LeCheminant J. Expanded Normal Weight Obesity and Insulin Resistance in US Adults of the National Health and Nutrition Examination Survey. *J Diabetes Res*. 2017;2017:9502643-9502643.
184. Tarlov E, Silva A, Wing C, et al. Neighborhood Walkability and BMI Change: A National Study of Veterans in Large Urban Areas. *Obesity (Silver Spring, Md)*. 2020;28(1):46-54.
215. Armstrong C. JNC8 guidelines for the management of hypertension in adults. *American family physician*. 2014;90(7):503-504.
226. Rowan CG, Turner JR, Shah A, Spaeder JA. Antihypertensive treatment and blood pressure control relative to hypertension treatment guidelines. *Pharmacoepidemiology and drug safety*. 2014;23(12):1294-1302.
247. Freitag MH, Vasan RS. What is normal blood pressure? *Current opinion in nephrology and hypertension*. 2003;12(3):285-292.
258. O'Brien E, Parati G, Stergiou G. Ambulatory blood pressure measurement: what is the international consensus? *Hypertension (Dallas, Tex : 1979)*. 2013;62(6):988-994.
279. Agarwal R, Light RP. The effect of measuring ambulatory blood pressure on nighttime sleep and daytime activity--implications for dipping. *Clin J Am Soc Nephrol*. 2010;5(2):281-285.
300. Burg MM, Brandt C, Buta E, et al. Risk for Incident Hypertension Associated With Posttraumatic Stress Disorder in Military Veterans and the Effect of Posttraumatic Stress Disorder Treatment. *Psychosomatic medicine*. 2017;79(2):181-188.
321. Fletcher RD, Jones R, Moore H, et al. INCREASED BODY MASS INDEX (BMI) PROMOTES HYPERTENSION AND WORSENS BLOOD PRESSURE CONTROL AMONG US VETERANS. *Journal of the American College of Cardiology*. 2018;71(11 Supplement):A1817.
342. Peng M, Chen G, Kaplan GG, et al. Methods of defining hypertension in electronic medical records: validation against national survey data. *Journal of public health (Oxford, England)*. 2016;38(3):e392-e399.
3623. Banerjee D, Chung S, Wong EC, Wang EJ, Stafford RS, Palaniappan LP. Underdiagnosis of hypertension using electronic health records. *American journal of hypertension*. 2012;25(1):97-102.
3824. **Hypertension prevalence estimator tool.**
405. Soohoo M, Moradi H, Obi Y, Kovesdy CP, Kalantar-Zadeh K, Streja E. Serum triglycerides and mortality risk across stages of chronic kidney disease in 2 million U.S. veterans. *Journal of clinical lipidology*. 2019;13(5):744-753.e715.
426. Laclaustra M, Stranges S, Navas-Acien A, Ordovas JM, Guallar E. Serum selenium and serum lipids in US adults: National Health and Nutrition Examination Survey (NHANES) 2003-2004. *Atherosclerosis*. 2010;210(2):643-648.
4427. Toth PP, Potter D, Ming EE. Prevalence of lipid abnormalities in the United States: the National Health and Nutrition Examination Survey 2003-2006. *Journal of clinical lipidology*. 2012;6(4):325-330.

26. Fleet JL, Dixon SN, Shariff SZ, et al. Detecting chronic kidney disease in population-based administrative databases using an algorithm of hospital encounter and physician claim codes. *BMC Nephrology*. 2013;14(1):81.
- 1 29. Prevention CfDca. *Prevalence of patients with an ICD-9-CM or ICD-10-CM code indicating CKD*.
- 2 30. Quan HS, V.; Halfon, P.; et al. Coding algorithms for defining comorbidities in ICD-9-CM and ICD-10 administrative data. *Medical care*. 2005;43(11):1130-1139.
- 3 31. Lix LS, M.; Piz, M.; Ahmed, R.; Quon, H.; Griffith, J., et al. *Cancer data linkage in manitoba: Expanding the infrastructure for research*. 2016.
- 4 32. Grams ME, Juraschek SP, Selvin E, et al. Trends in the prevalence of reduced GFR in the United States: a comparison of creatinine- and cystatin C-based estimates. *Am J Kidney Dis*. 2013;62(2):253-260.
- 5
- 6 33. Hemmelgarn BR, Manns BJ, Lloyd A, et al. Relation Between Kidney Function, Proteinuria, and Adverse Outcomes. *JAMA*. 2010;303(5):423-429.
- 7 34. Husain N, Blais P, Kramer J, et al. Nonalcoholic fatty liver disease (NAFLD) in the Veterans Administration population: development and validation of an algorithm for NAFLD using automated data. *Alimentary Pharmacology & Therapeutics*. 2014;40(8):949-954.
- 8
- 9
- 10
- 11
- 12
- 13
- 14
- 15
- 16
- 17
- 18
- 19
- 20
- 21
- 22
- 23
- 24
- 25
- 26
- 27
- 28
- 29
- 30
- 31
- 32
- 33
- 34
- 35
- 36
- 37
- 38
- 39
- 40
- 41
- 42
- 43
- 44
- 45
- 46
- 47

For peer review only

STROBE Statement—Checklist of items that should be included in reports of *cohort studies*

|                           | Item No | Recommendation                                                                                                                                                                       | Page No |
|---------------------------|---------|--------------------------------------------------------------------------------------------------------------------------------------------------------------------------------------|---------|
| <b>Title and abstract</b> | 1       | (a) Indicate the study's design with a commonly used term in the title or the abstract                                                                                               | 1       |
|                           |         | (b) Provide in the abstract an informative and balanced summary of what was done and what was found                                                                                  | 1       |
| <b>Introduction</b>       |         |                                                                                                                                                                                      |         |
| Background/rationale      | 2       | Explain the scientific background and rationale for the investigation being reported                                                                                                 | 2       |
| Objectives                | 3       | State specific objectives, including any prespecified hypotheses                                                                                                                     | 2       |
| <b>Methods</b>            |         |                                                                                                                                                                                      |         |
| Study design              | 4       | Present key elements of study design early in the paper                                                                                                                              | 2,3     |
| Setting                   | 5       | Describe the setting, locations, and relevant dates, including periods of recruitment, exposure, follow-up, and data collection                                                      | 3       |
| Participants              | 6       | (a) Give the eligibility criteria, and the sources and methods of selection of participants. Describe methods of follow-up                                                           | 3       |
|                           |         | (b) For matched studies, give matching criteria and number of exposed and unexposed                                                                                                  | n/a     |
| Variables                 | 7       | Clearly define all outcomes, exposures, predictors, potential confounders, and effect modifiers. Give diagnostic criteria, if applicable                                             | 3,4     |
| Data sources/measurement  | 8*      | For each variable of interest, give sources of data and details of methods of assessment (measurement). Describe comparability of assessment methods if there is more than one group | 2       |
| Bias                      | 9       | Describe any efforts to address potential sources of bias                                                                                                                            | n/a     |
| Study size                | 10      | Explain how the study size was arrived at                                                                                                                                            | n/a     |
| Quantitative variables    | 11      | Explain how quantitative variables were handled in the analyses. If applicable, describe which groupings were chosen and why                                                         | 4       |
| Statistical methods       | 12      | (a) Describe all statistical methods, including those used to control for confounding                                                                                                | n/a     |
|                           |         | (b) Describe any methods used to examine subgroups and interactions                                                                                                                  | n/a     |
|                           |         | (c) Explain how missing data were addressed                                                                                                                                          | n/a     |
|                           |         | (d) If applicable, explain how loss to follow-up was addressed                                                                                                                       | 3       |
|                           |         | (e) Describe any sensitivity analyses                                                                                                                                                | n/a     |
| <b>Results</b>            |         |                                                                                                                                                                                      |         |

|    |                  |     |                                                                                                                                                                                                   |         |
|----|------------------|-----|---------------------------------------------------------------------------------------------------------------------------------------------------------------------------------------------------|---------|
| 1  | Participants     | 13* | (a) Report numbers of individuals at each stage of study—eg numbers potentially eligible, examined for eligibility, confirmed eligible, included in the study, completing follow-up, and analysed | 3       |
| 2  |                  |     |                                                                                                                                                                                                   |         |
| 3  |                  |     |                                                                                                                                                                                                   |         |
| 4  |                  |     | (b) Give reasons for non-participation at each stage                                                                                                                                              | n/a     |
| 5  |                  |     | (c) Consider use of a flow diagram                                                                                                                                                                | Figure1 |
| 6  |                  |     |                                                                                                                                                                                                   |         |
| 7  |                  |     |                                                                                                                                                                                                   |         |
| 8  | Descriptive data | 14* | (a) Give characteristics of study participants (eg demographic, clinical, social) and information on exposures and potential confounders                                                          | 4,5     |
| 9  |                  |     |                                                                                                                                                                                                   | Table 1 |
| 10 |                  |     |                                                                                                                                                                                                   |         |
| 11 |                  |     | (b) Indicate number of participants with missing data for each variable of interest                                                                                                               | n/a     |
| 12 |                  |     | (c) Summarise follow-up time (eg, average and total amount)                                                                                                                                       | 3       |
| 13 |                  |     |                                                                                                                                                                                                   |         |
| 14 |                  |     |                                                                                                                                                                                                   |         |
| 15 |                  |     |                                                                                                                                                                                                   |         |
| 16 |                  |     |                                                                                                                                                                                                   |         |
| 17 | Outcome data     | 15* | Report numbers of outcome events or summary measures over time                                                                                                                                    | n/a     |
| 18 |                  |     |                                                                                                                                                                                                   |         |

For peer review only

|    |                          |    |                                                                                                                                                                                                              |     |
|----|--------------------------|----|--------------------------------------------------------------------------------------------------------------------------------------------------------------------------------------------------------------|-----|
| 1  | Main results             | 16 | (a) Give unadjusted estimates and, if applicable, confounder-adjusted estimates and their precision (eg, 95% confidence interval). Make clear which confounders were adjusted for and why they were included | n/a |
| 2  |                          |    |                                                                                                                                                                                                              |     |
| 3  |                          |    |                                                                                                                                                                                                              |     |
| 4  |                          |    |                                                                                                                                                                                                              |     |
| 5  |                          |    | (b) Report category boundaries when continuous variables were categorized                                                                                                                                    |     |
| 6  |                          |    |                                                                                                                                                                                                              |     |
| 7  |                          |    | (c) If relevant, consider translating estimates of relative risk into absolute risk for a meaningful time period                                                                                             |     |
| 8  |                          |    |                                                                                                                                                                                                              |     |
| 9  |                          |    |                                                                                                                                                                                                              |     |
| 10 | Other analyses           | 17 | Report other analyses done—eg analyses of subgroups and interactions, and sensitivity analyses                                                                                                               |     |
| 11 |                          |    |                                                                                                                                                                                                              |     |
| 12 |                          |    |                                                                                                                                                                                                              |     |
| 13 | <b>Discussion</b>        |    |                                                                                                                                                                                                              |     |
| 14 |                          |    |                                                                                                                                                                                                              |     |
| 15 | Key results              | 18 | Summarise key results with reference to study objectives                                                                                                                                                     | 4/5 |
| 16 |                          |    |                                                                                                                                                                                                              |     |
| 17 | Limitations              | 19 | Discuss limitations of the study, taking into account sources of potential bias or imprecision. Discuss both direction and magnitude of any potential bias                                                   | 5   |
| 18 |                          |    |                                                                                                                                                                                                              |     |
| 19 | Interpretation           | 20 | Give a cautious overall interpretation of results considering objectives, limitations, multiplicity of analyses, results from similar studies, and other relevant evidence                                   | 5   |
| 20 |                          |    |                                                                                                                                                                                                              |     |
| 21 |                          |    |                                                                                                                                                                                                              |     |
| 22 | Generalisability         | 21 | Discuss the generalisability (external validity) of the study results                                                                                                                                        | 5   |
| 23 |                          |    |                                                                                                                                                                                                              |     |
| 24 |                          |    |                                                                                                                                                                                                              |     |
| 25 | <b>Other information</b> |    |                                                                                                                                                                                                              |     |
| 26 |                          |    |                                                                                                                                                                                                              |     |
| 27 | Funding                  | 22 | Give the source of funding and the role of the funders for the present study and, if applicable, for the original study on which the present article is based                                                | 6   |
| 28 |                          |    |                                                                                                                                                                                                              |     |
| 29 |                          |    |                                                                                                                                                                                                              |     |

\*Give information separately for exposed and unexposed groups.

**Note:** An Explanation and Elaboration article discusses each checklist item and gives methodological background and published examples of transparent reporting. The STROBE checklist is best used in conjunction with this article (freely available on the Web sites of PLoS Medicine at <http://www.plosmedicine.org/>, Annals of Internal Medicine at <http://www.annals.org/>, and Epidemiology at <http://www.epidem.com/>). Information on the STROBE Initiative is available at <http://www.strobe-statement.org>.



# BMJ Open

## Cohort Profile: The US Veterans Administration Diabetes Risk (VADR) National Cohort

|                                 |                                                                                                                                                                                                                                                                                                                                                                                                                                                                                                      |
|---------------------------------|------------------------------------------------------------------------------------------------------------------------------------------------------------------------------------------------------------------------------------------------------------------------------------------------------------------------------------------------------------------------------------------------------------------------------------------------------------------------------------------------------|
| Journal:                        | <i>BMJ Open</i>                                                                                                                                                                                                                                                                                                                                                                                                                                                                                      |
| Manuscript ID                   | bmjopen-2020-039489.R1                                                                                                                                                                                                                                                                                                                                                                                                                                                                               |
| Article Type:                   | Cohort profile                                                                                                                                                                                                                                                                                                                                                                                                                                                                                       |
| Date Submitted by the Author:   | 06-Nov-2020                                                                                                                                                                                                                                                                                                                                                                                                                                                                                          |
| Complete List of Authors:       | Avramovic, Sanja; George Mason University; VA New York Harbor Healthcare System<br>Alemi, Farrokh ; George Mason University<br>Kanchi, Rania; New York University School of Medicine<br>Lopez, Priscilla; New York University School of Medicine<br>Hayes, Richard; New York University School of Medicine<br>Thorpe, Lorna; New York University School of Medicine, Department of Population Health<br>Schwartz, Mark; New York University School of Medicine; VA New York Harbor Healthcare System |
| <b>Primary Subject Heading</b>: | Diabetes and endocrinology                                                                                                                                                                                                                                                                                                                                                                                                                                                                           |
| Secondary Subject Heading:      | Epidemiology                                                                                                                                                                                                                                                                                                                                                                                                                                                                                         |
| Keywords:                       | General diabetes < DIABETES & ENDOCRINOLOGY, Health informatics < BIOTECHNOLOGY & BIOINFORMATICS, EPIDEMIOLOGY                                                                                                                                                                                                                                                                                                                                                                                       |
|                                 |                                                                                                                                                                                                                                                                                                                                                                                                                                                                                                      |

SCHOLARONE™  
Manuscripts



I, the Submitting Author has the right to grant and does grant on behalf of all authors of the Work (as defined in the below author licence), an exclusive licence and/or a non-exclusive licence for contributions from authors who are: i) UK Crown employees; ii) where BMJ has agreed a CC-BY licence shall apply, and/or iii) in accordance with the terms applicable for US Federal Government officers or employees acting as part of their official duties; on a worldwide, perpetual, irrevocable, royalty-free basis to BMJ Publishing Group Ltd ("BMJ") its licensees and where the relevant Journal is co-owned by BMJ to the co-owners of the Journal, to publish the Work in this journal and any other BMJ products and to exploit all rights, as set out in our [licence](#).

The Submitting Author accepts and understands that any supply made under these terms is made by BMJ to the Submitting Author unless you are acting as an employee on behalf of your employer or a postgraduate student of an affiliated institution which is paying any applicable article publishing charge ("APC") for Open Access articles. Where the Submitting Author wishes to make the Work available on an Open Access basis (and intends to pay the relevant APC), the terms of reuse of such Open Access shall be governed by a Creative Commons licence – details of these licences and which [Creative Commons](#) licence will apply to this Work are set out in our licence referred to above.

Other than as permitted in any relevant BMJ Author's Self Archiving Policies, I confirm this Work has not been accepted for publication elsewhere, is not being considered for publication elsewhere and does not duplicate material already published. I confirm all authors consent to publication of this Work and authorise the granting of this licence.

## Cohort Profile: The US Veterans Administration Diabetes Risk (VADR) National Cohort

Sanja Avramovic,<sup>1,3</sup> Farrokh Alemi,<sup>1</sup> Rania Kanchi,<sup>2</sup> Priscilla Lopez,<sup>2</sup> Richard B Hayes,<sup>2</sup> Lorna E. Thorpe,<sup>2</sup> Mark D Schwartz<sup>2,3</sup>

<sup>1</sup> Department of Health Administration and Policy, George Mason University, Fairfax, VA

<sup>2</sup> Department of Population Health, NYU School of Medicine, New York, NY

<sup>3</sup> VA New York Harbor Healthcare System, New York, NY

Correspondence to

Dr. Sanja Avramovic; savramov@gmu.edu

### Abstract

**Purpose** The Veterans Administration Diabetes Risk (VADR) cohort facilitates studies on temporal and geographic patterns of prediabetes and diabetes, as well as targeted studies of their predictors. The cohort provides an infrastructure for examination of novel individual and community-level risk factors for diabetes and their consequences among veterans. This cohort also establishes a baseline against which to assess the impact of national or regional strategies to prevent diabetes in veterans.

**Participants** The VA Diabetes Risk Cohort (VADR) includes all 6,082,018 veterans in the United States who were diabetes-free as of January 1, 2008, or who subsequently enrolled in the VA for primary care and were diabetes-free at cohort entry through December 31, 2016, and who had at least 2 diabetes-free visits to a VA primary care service at least 30 days apart within any 5-year period since January 1, 2003. Cohort subjects were followed from the date of cohort entry until censor defined as date of incident diabetes, loss to follow-up of 2 years, death, or until December, 31, 2018.

**Findings to Date** The incidence rate of type 2 diabetes in this cohort of over 6 million veterans followed for a median of 5.5 years (over 35 million person-years) was 26 per 1000 person-years. During the study period, 8.5% of the cohort were lost to follow-up and 17.7% died. Many demographic, comorbidity, and other clinical variables were more prevalent among patients with incident diabetes.

**Future Plans** This cohort will be used to study community-level risk factors for diabetes, such as attributes of the food environment and neighborhood socioeconomic status via geospatial linkage to residence address information.

### Strengths and Limitations of this Study

- A strength of this national cohort is that it has a large size, a high degree of long-term follow-up, and a comprehensive set of variables.
- The VA healthcare system is the nation's largest integrated healthcare system, in which veterans are followed across all VA facilities and in-system providers.

- Documented data are restricted to that which is collected in EHRs during the course of clinical practice, leading to the possibility of confounding, selection bias and measurement error.
- The veteran population is predominantly male and white, and so the findings may not generalize to minorities or to women.

## Introduction

Diabetes mellitus (diabetes) is a chronic disease that affects 34.2 million (10.5%) of adults and children in the United States (US).<sup>1</sup> As of 2018, diabetes was the seventh leading cause of death and one of the major contributors to heart disease and stroke.<sup>2</sup> Adjusting for age and gender, all-cause mortality is 1.5 times greater for people with diabetes than for people without diabetes, and average health care costs are 2.3 times higher.<sup>3</sup> Another 88 million American adults (34.5%) are estimated to have prediabetes and at risk of developing diabetes.<sup>4</sup>

The Veterans Administration (VA) cares for more than 8 million US veterans, of whom approximately 25% have diabetes.<sup>5,6</sup> The annual mortality rate among veterans with diabetes is 5%—nearly double that of veterans without diabetes.<sup>7,8</sup> It is likely that nearly 3 million other veterans have prediabetes. These high rates compared to the general population may be due to the increased proportions of overweight (37%) and obesity (41%) among veterans,<sup>9</sup> their older age, lower socioeconomic status,<sup>10</sup> and possible exposure to herbicides such as Agent Orange.<sup>11</sup>

Behavioral prevention interventions can reduce the incidence of diabetes by 50–70%,<sup>12,13</sup> but scaling this up for population impact has been challenging due to the intensity and cost of the intervention and challenges of enrolling patients for such programs.<sup>14-17</sup>

In response to these challenges, we developed the Veterans Administration Diabetes Risk (VADR) Cohort, a national cohort of all US veterans enrolled at the Veterans Health Administration (VHA) since January 1, 2008 who were diabetes-free at enrollment. The cohort was developed as a part of the Diabetes Location, Environmental Attributes, and Disparities (LEAD) network; a Center for Disease Control and Prevention (CDC) funded research collaboration among Drexel University, Geisinger-Johns Hopkins, New York University School of Medicine, and University of Alabama at Birmingham with the CDC as a collaborative scientific partner in the network.<sup>18</sup>

The VADR cohort facilitates studies on temporal and geographic patterns of prediabetes and diabetes, as well as targeted studies of their predictors. For example, the cohort currently provides the infrastructure for the nationwide study examining community-level risk factors for diabetes incidence and management among veterans described above. This cohort also establishes a baseline against which to assess the impact of national or regional strategies to prevent diabetes in veterans. It also provides an analytic cohort to examine the dynamic relationship between the COVID-19 pandemic and diabetes outcomes.

## Cohort Description

VADR is the largest national cohort of diabetes-free adults in the US. Established in 2017 as a dynamic cohort enabled by the VA national electronic health record (EHR), the cohort includes

1  
2  
3 diabetes-free US veterans enrolled in primary care clinics at any VA facility as early as January 1,  
4 2008 through December 31, 2016, and followed from cohort entry through December 31, 2018.  
5 VA primary care clinics operate in 170 VA Medical Centers (VAMCs) and in more than 1,000  
6 Community-Based Outpatient Clinics (CBOCs) across the US.<sup>19</sup> As a dynamic cohort, subject  
7 follow-up is ongoing, but this paper reports on the cohort from January 1, 2008 through  
8 December 31, 2018.  
9

10  
11 Building on published, validated criteria in EHRs,<sup>7,20</sup> we defined diabetes using the following  
12 query-based definition comprised of any of three criteria: (1) at least two encounters (inpatient  
13 or outpatient) with documentation of a Type 2 diabetes ICD-9/10 code (ICD-9: 250.x; ICD-10:  
14 E11.x) or (2) a documented prescription for a diabetes medication other than metformin or  
15 acarbose alone; or (3) at least one encounter with a diabetes ICD-9/10 code and two elevated  
16 ( $\geq 6.5\%$ ) glycosylated hemoglobin (Hgb A1C) lab test results (see Appendix for complete  
17 definition).<sup>21</sup> We excluded metformin or acarbose alone from the criteria because these drugs  
18 may be used for diabetes prevention in patients with prediabetes; including them may lead to  
19 misclassifying cases of prediabetes as diabetes.<sup>22,23</sup> This definition for incident diabetes was  
20 used to exclude prevalent diabetes cases prior to cohort entry and to estimate diabetes  
21 incidence during the study period.  
22  
23  
24

25 For the analytic cohort, subjects were eligible if they were veterans with at least 2 diabetes-free  
26 visits to a VA primary care service, occurring at least 30 days apart, from January 1<sup>st</sup> 2003 to  
27 December 31<sup>st</sup> 2016. Cohort entry (baseline) was defined as either January 1, 2008 or the date  
28 of the second diabetes-free primary care visit for subjects entering after January 1, 2008.  
29 Eligible subjects were allowed to enter the cohort through December 31, 2016 to allow at least  
30 2 years of follow-up during which subjects may be diagnosed with diabetes. Subjects were  
31 censored when they developed diabetes, died, or were lost to follow-up (defined as having no  
32 encounters in the VA health system for more than 2 years). Once a patient was lost-to-follow-  
33 up, they were not eligible to re-enter the cohort. Encounters for follow-up included any visits to  
34 primary care, specialists, emergency departments, walk-in clinics, hospitalizations, or nursing  
35 home stays at any VA facility. Person-years (PY) of follow-up for each subject were calculated as  
36 the interval between cohort entry date and censor date.  
37  
38  
39

40 As shown in **Figure 1**, the cohort was developed from a base total population of 8,346,180  
41 patients seen for at least 1 primary care visit between 1999, the earliest year for which EHR  
42 data were available on patients, and the start of the study period. The cohort was then  
43 restricted to patients seen in the five years prior to the study period start date, January 1, 2008.  
44 Patients were excluded if they had fewer than 2 primary care visits, at least 30 days apart  
45 during that five year time period and less than 2 primary care visits after cohort entry. After  
46 excluding patients with prevalent diabetes, the initial diabetes-free cohort included 2,968,763  
47 patients. Another 3,113,255 diabetes-free patients met the same eligibility criteria after the  
48 start of the study period and entered the cohort between January 1, 2008 and December 31,  
49 2016, resulting in a diabetes-free cohort of 6,082,018 patients.  
50  
51  
52

53 Information on subjects in the cohort was updated daily as it was drawn from EHR at all VA  
54 facilities into the VA corporate data warehouse (CDW), based on all clinical services provided  
55 and documented by the VA to subjects over time. All data in the cohort were obtained through  
56  
57  
58

1  
2  
3 the VA Informatics and Computing Infrastructure (VINCI), a secure, high performance interface  
4 with VA's national CDW, available through VA's Information Resource Center (VIREC).<sup>24</sup> The  
5 CDW contains data integrated from VA's electronic medical record (VISTA, Veterans Health  
6 Information Systems and Technology Architecture), including all administrative data (e.g. all  
7 dates of encounters and diagnostic codes for outpatient and inpatient care), patient  
8 demographic characteristics, clinical data (e.g. vital signs, health factors, pharmacy, laboratory,  
9 radiological, clinical notes, etc.), and healthcare utilization factors as they accrue over time, as  
10 the CDW is refreshed daily.<sup>25</sup>

11  
12  
13 The main outcome variable was a new diagnosis of Type 2 diabetes, measured using the  
14 definition described earlier.

#### 15 16 Predictor variables and covariates

17  
18 All continuous variables with repeated measures, including anthropomorphic, vital signs, and  
19 laboratory values, were defined as the average of the two most recent measures, prior to or at  
20 the time of cohort entry. If only one measure was taken prior to cohort entry, that was used as  
21 the baseline measure. The rate of missing data for all variables was measured.

22  
23 Demographic measures were captured at baseline, including age, gender, marital status,  
24 race/ethnicity. First address on file per patient in cohort were exported out of the VINCI  
25 environment, geocoded using ArcGIS<sup>26</sup> and Python<sup>27</sup>, and mapped to show number of patients  
26 in the cohort per census tract using QGIS.<sup>28</sup>

27  
28  
29 Glycemia and body weight are important predictors of diabetes. We measured Hgb A1c as a  
30 continuous value, and classified as normal (<5.7%), prediabetes (5.7% to 6.4%), or diabetes  
31 ( $\geq 6.5\%$ ). We measured weight in pounds and body mass mass index (BMI), defined as (weight in  
32 kilograms) / (height in meters)<sup>2</sup>. BMI was also classified as underweight (<18.5); normal (18.5 to  
33 <25); overweight (25.0 to <30); and obese ( $\geq 30.0$ ).<sup>29</sup>

34  
35  
36 Common comorbidities measured at baseline included established risk factors for diabetes such  
37 as obesity, hypertension, gestational diabetes, cardiovascular disease, chronic kidney disease  
38 hyperuricemia, fatty liver disease, polycystic ovary syndrome, and hepatitis C. These and all  
39 other comorbidities were defined as having at least 1 ICD code in the EHR prior to entering the  
40 cohort. Hyperlipidemia was defined as at least 2 encounters with ICD codes for hyperlipidemia,  
41 total cholesterol >240 mg/dL, or the use of lipid lowering medications.<sup>30</sup> Hypertension was  
42 defined as at least ICD code for hypertension or at least 2 consecutive elevated BP within the  
43 last two years prior to cohort entry.<sup>31,32</sup> Elevated BP was included as as  $\geq 130/80$  and  $\geq 140/90$ ,  
44 respectively, to comply with changes in hypertension guidelines over the course of the study  
45 period.<sup>33,34</sup>

46  
47  
48 Other clinical variables potentially related to diabetes incidence included: Blood Pressure (BP,  
49 excluding those measured in the hospital, emergency department, or at night); Lipids (Total  
50 Cholesterol, High Density Lipoprotein, Low Density Lipoprotein, and Triglycerides; Hepatic  
51 Transaminase Enzymes (serum aspartate aminotransferase - AST or SGOT - and alanine  
52 aminotransferase - ALT or SGPT); Renal Function (measured as Estimated Glomerular Filtration  
53 Rate - eGFR); Smoking Status: (Obtained from Health Factor files within CDW at cohort entry,  
54 classified as current, ever, or never smokers); and Agent Orange Exposure (Obtained from the  
55  
56  
57

number of veterans with Agent Orange listed as a health factor in the medical record).<sup>11</sup> Beside this select list, all documented diagnoses and treatments are available for the cohort.

### Access to Cohort Data

Access to VA electronic health records data is limited to researchers with active, VA appointments and an IRB-approved protocol. Once a researcher has a VA appointment and IRB approval, the VA has a comprehensive data infrastructure to support secure and remote access to data via the VINCI platform. Additionally, deidentified datasets can be established and shared with appropriate IRB approval and data use agreements. The authors encourage collaborations to leverage this cohort to examine how national or regional natural experiments may be related to diabetes incidence or diabetes outcomes.

### Findings to Date

The total person-years (PY) for this national cohort with 6,082,018 veterans from all 50 states was 35,889,183 (median 5.5 PY, IQR: 2.6 - 9.8). As shown in **Table 1**, the mean age of the cohort was 58 years at baseline, 36.4% were 65 or older, most were male (91.7%), more than two-thirds were non-Hispanic white (74.8%), 16.3% were non-Hispanic black, and 6.1% were Hispanic. The majority (55.2%) were married or living with a partner.

At baseline, the average Hgb A1C was 5.7% among the 40.7% of the cohort tested at entry, and of these, 41.5% had an Hgb A1C in the prediabetes range. The average weight was 196.9 pounds and average BMI was 28.8 (SD 5.4). At baseline, 40.6% were overweight and 36.1% were obese. Traditional clinical risk factors for diabetes were common in this cohort as 46.1% had hypertension, 44.1% had hyperlipidemia, and 42.6% were smokers. Other clinical risk factors for diabetes included ischemic heart disease (16.4%), peripheral vascular disease (4.2%), heart failure (3.0%), and chronic kidney disease (2.5%). Most of these risk factors were present at baseline at higher rates among those who developed diabetes compared with those who did not during cohort follow-up.

**Figure 2** shows the number of subjects in the cohort over time, from inception January 1, 2008 through December 31, 2018. Almost half (48.8%) of the cohort entered at cohort inception in January 1, 2008, with the remainder entering during the study period through December 31, 2016. During cohort follow-up, 936,596 (15.4%) veterans developed diabetes, for an incidence rate of 26 per 1,000 PY. Additionally, 518,489 (8.5%) were lost to follow-up, and 1,077,572 (17.7%) died during the study period. **Figure 3** shows the geographic distribution of the number of patients per tract. The majority of addresses were able to be geocoded (89%); of those not geocoded, about half were PO boxes, and the other half were missing. The majority of census tracts had between 20-80 patients.

Because cohort data were drawn from the VA EHR, which depends on documentation of services provided, some subjects had missing values for some variables at baseline. For example, the percentage of missing variables at cohort entry were: gender (<0.01%); race/ethnicity (10.1%); marital status (7.5%); BMI (4.3%); and Hgb A1C (59.3%). The missing

1  
2  
3 race/ethnicity variable in VA data is widely known.<sup>35</sup> Screening for diabetes with Hgb A1c  
4 became more common after the recommendation was published in 2009.<sup>36</sup>  
5  
6  
7

### 8 **Strengths and Limitations**

9  
10 A primary strength of this national cohort is its large size and long-term follow-up. The cohort  
11 includes a comprehensive set of demographic, anthropomorphic, clinical, treatment, and other  
12 administrative variables, drawn from all inpatient and outpatient encounters, each of which are  
13 automatically updated over time. In addition to the select comorbidities identified in this paper,  
14 the cohort includes data related to all comorbidities. Future work will include calculation of a  
15 multi-morbidity index to measure the impact of medical history on emergence of diabetes.<sup>37</sup>  
16

17 As the nation's largest, integrated healthcare system, the VA follows veterans across all VA  
18 facilities, even after moving and changing VA facilities or providers within the system.  
19 Additionally, data on veterans who are Medicare or Medicaid beneficiaries and seek health care  
20 outside of the VA will be included by merging the study cohort with data from the Centers for  
21 Medicare and Medicaid (CMS). Finally, home addresses are available and were geocoded in  
22 order to study the effect of community level characteristics and the impact of moving over time  
23 on incident diabetes in future work using this cohort.  
24

25  
26 The cohort has a few limitations. It relies on data documented during the course of clinical  
27 practice in EHRs and thus causal inferences face difficulties associated with unmeasured  
28 confounding, selection bias, and measurement error. Selection biases may arise as lower health  
29 care utilizers are more likely to be lost to follow-up or excluded, and higher utilizers may be  
30 more likely to meet criteria for key exposure and outcome variables. This is partially mitigated  
31 by the several-year, longitudinal follow-up.  
32  
33

34 The veteran population is predominantly male and white, and so the findings may not  
35 generalize to minorities or to women. Nonetheless, our large cohort ensures a sufficient and  
36 growing sample of women veterans (504,002) and patients from major ethnic/racial groups  
37 (889,465 NH black veterans, 331,817 Hispanic veterans), providing the ability to study diabetes  
38 incidence among these subgroups and improving the generalizability of our findings to non-  
39 veteran populations.  
40  
41  
42  
43

### 44 **Conclusion**

45  
46 The VA Diabetes Risk Cohort (VADR) is an important example of how large retrospective cohorts  
47 can be developed using electronic health records, designed with methodologic and statistical  
48 approaches to increase generalizability and validity. The benefits of such large cohorts are that  
49 they can offer more information and ability to examine associations in substrata than smaller  
50 cohorts. Follow up is ongoing and presented here through December 31, 2018. While the main  
51 outcome of interest was incidence of type 2 diabetes in this cohort, the infrastructure is well-  
52 suited to support studies of diabetes management and management of other chronic  
53 conditions using incident cases of diabetes, particularly as retention has been shown to be  
54  
55  
56  
57  
58  
59  
60



1  
2  
3 good. During the study period, only 8.5% of the cohort were lost to follow-up and 17.7% died.  
4 Additional methodologic work is needed to address biases unique to EHR-based observational  
5 studies, including cohort selection bias and nonignorable missing data  
6  
7  
8

### 9 **Patient and Public Involvement**

10  
11 This cohort study was conducted without engagement or co-production by patients or the  
12 public.  
13  
14  
15  
16  
17  
18  
19  
20  
21  
22  
23  
24  
25  
26  
27  
28  
29  
30  
31  
32  
33  
34  
35  
36  
37  
38  
39  
40  
41  
42  
43  
44  
45  
46  
47  
48  
49  
50  
51  
52  
53  
54  
55  
56  
57  
58  
59  
60

For peer review only

**Table 1. Cohort demographics and clinical characteristics at cohort entry by incident diabetes status**

|                                              | All veterans <sup>^</sup> | Veterans without incident diabetes † | Veterans with incident diabetes | Not measured or Missing |
|----------------------------------------------|---------------------------|--------------------------------------|---------------------------------|-------------------------|
|                                              | n (%) or mean (SD)        | n (%) or mean (SD)                   | n (%) or mean (SD)              | n (%)                   |
| <b>Total</b>                                 | 6,082,018                 | 5,145,422                            | 936,596                         |                         |
| <b>Demographic characteristics</b>           |                           |                                      |                                 |                         |
| <b>Age</b>                                   | 58.3 (17)                 | 53.9 (16.1)                          | 61.1 (12.2)                     |                         |
| <b>Age categories</b>                        |                           |                                      |                                 |                         |
| 18-34                                        | 745511 (12.3)             | 592256 (16.7)                        | 21788 (2.3)                     |                         |
| 35-49                                        | 1009677 (16.6)            | 725427 (20.4)                        | 130345 (13.9)                   |                         |
| 50-64                                        | 2114275 (34.8)            | 1280132 (36.1)                       | 451964 (48.3)                   |                         |
| 65-79                                        | 1499787 (24.7)            | 786213 (22.2)                        | 261592 (27.9)                   |                         |
| 80+                                          | 712681 (11.7)             | 165264 (4.7)                         | 70900 (7.6)                     |                         |
| <b>Gender</b>                                |                           |                                      |                                 | 124 (0)                 |
| Male                                         | 5577892 (91.7)            | 3167502 (89.2)                       | 886763 (94.7)                   |                         |
| Female                                       | 504002 (8.3)              | 381768 (10.8)                        | 49818 (5.3)                     |                         |
| <b>Race ethnicity</b>                        |                           |                                      |                                 | 612210 (10.07)          |
| Non-Hispanic white                           | 4092942 (74.8)            | 2412225 (73.8)                       | 614511 (70.8)                   |                         |
| Non-Hispanic black                           | 889465 (16.3)             | 544434 (16.7)                        | 173057 (19.9)                   |                         |
| Hispanic                                     | 331817 (6.1)              | 211459 (6.5)                         | 55301 (6.4)                     |                         |
| Non-Hispanic Asian                           | 55564 (1)                 | 37545 (1.2)                          | 7705 (0.9)                      |                         |
| NH-Native Hawaiian or other Pacific Islander | 50426 (0.9)               | 30228 (0.9)                          | 9020 (1)                        |                         |
| NH-American Indian or Alaska Native          | 49594 (0.9)               | 31107 (1)                            | 8474 (1)                        |                         |
| <b>Marital status</b>                        |                           |                                      |                                 | 453512 (7.46)           |
| Married or living with a partner             | 3104312 (55.2)            | 1832844 (55.2)                       | 477337 (56.2)                   |                         |
| Single                                       | 2524194 (44.9)            | 1488661 (44.8)                       | 372630 (43.8)                   |                         |
| <b>Clinical characteristics</b>              |                           |                                      |                                 |                         |
| <b>HbA1c</b>                                 | 5.7 (0.6)                 | 5.5 (0.4)                            | 6.1 (0.9)                       | 3608600 (59.33)         |
| <b>HbA1c categories</b>                      |                           |                                      |                                 |                         |
| Normal (<5.7%)                               | 1311768 (53)              | 875677 (62.3)                        | 128681 (25.8)                   |                         |

1  
2  
3  
4  
5  
6  
7  
8  
9  
10  
11  
12  
13  
14  
15  
16  
17  
18  
19  
20  
21  
22  
23  
24  
25  
26  
27  
28  
29  
30  
31  
32  
33  
34  
35  
36  
37  
38  
39  
40  
41  
42  
43  
44  
45  
46  
47  
48  
49  
50  
51  
52  
53  
54  
55  
56  
57  
58  
59  
60

|                                                    |                |                |               |                 |
|----------------------------------------------------|----------------|----------------|---------------|-----------------|
| Prediabetes (5.7%-6.49%)                           | 1027336 (41.5) | 514758 (36.6)  | 268105 (53.8) |                 |
| Diabetes range (≥6.5%)                             | 134314 (5.4)   | 15302 (1.1)    | 101746 (20.4) |                 |
| <b>Weight in pounds</b>                            | 196.9 (40.7)   | 196.6 (38.9)   | 214.7 (45.1)  | 260313 (4.28)   |
| <b>BMI</b>                                         | 28.8 (5.4)     | 28.7 (5.1)     | 31.3 (6)      | 260313 (4.28)   |
| Underweight (<18.5)                                | 48954 (0.8)    | 18042 (0.5)    | 4417 (0.5)    |                 |
| Normal weight (18.5-<25)                           | 1308427 (22.5) | 732429 (21.6)  | 105224 (11.7) |                 |
| Overweight (25-<30)                                | 2362867 (40.6) | 1441730 (42.5) | 294224 (32.6) |                 |
| Obese (≥30)                                        | 2101457 (36.1) | 1197716 (35.3) | 499082 (55.3) |                 |
| <b>Measured blood pressure*</b>                    |                |                |               |                 |
| Systolic blood pressure                            | 130.4 (14.7)   | 129.3 (14.2)   | 133.2 (14.9)  | 290882 (4.78)   |
| Diastolic blood pressure                           | 76.8 (10)      | 77.6 (9.6)     | 78 (10.1)     | 290882 (4.78)   |
| Elevated blood pressure (≥130/80)                  | 3516559 (60.7) | 2011621 (59.4) | 609072 (67.9) | 290882 (4.78)   |
| Elevated blood pressure (≥140/90)                  | 1499481 (25.9) | 796617 (23.5)  | 287665 (32.1) | 290882 (4.78)   |
| <b>Hypertension</b>                                |                |                |               |                 |
| ≥1ICD code or 2 consecutive elevated BP* (≥130/80) | 2032490 (33.4) | 2137040 (60.2) | 760631 (81.2) |                 |
| ≥1ICD code or 2 consecutive elevated BP* (≥140/90) | 2805063 (46.1) | 1617389 (45.6) | 667469 (71.3) |                 |
| <b>Lipids</b>                                      |                |                |               |                 |
| Total cholesterol                                  | 185.5 (38.4)   | 188.3 (37.7)   | 185.4 (40.2)  | 1101271 (18.11) |
| Triglyceride                                       | 140.8 (88.9)   | 137.6 (86.9)   | 168.1 (103.2) | 1118227 (18.39) |
| LDL                                                | 112.6 (33.1)   | 115.3 (32.8)   | 111.4 (34.1)  | 1151308 (18.93) |
| HDL                                                | 46.3 (14.2)    | 47.3 (14.3)    | 42.4 (12.5)   | 1126777 (18.53) |
| <b>Hyperlipidemia‡</b>                             | 2681683 (44.1) | 1371518 (38.6) | 408288 (43.6) |                 |
| <b>Smoking status</b>                              |                |                |               | 3853822 (63.36) |
| Current smoker                                     | 948272 (42.6)  | 561968 (41.9)  | 140333 (44.3) |                 |
| Not a smoker                                       | 1279924 (57.4) | 780134 (58.1)  | 176777 (55.8) |                 |
| <b>Estimated glomerular filtration rate (eGFR)</b> | 80.1 (18.3)    | 82.5 (16.7)    | 78.6 (18.4)   | 2718664 (44.7)  |
| <b>eGFR categories</b>                             |                |                |               |                 |

|    |                                  |                |                |                 |
|----|----------------------------------|----------------|----------------|-----------------|
| 1  |                                  |                |                |                 |
| 2  |                                  |                |                |                 |
| 3  | eGFR $\geq$ 90 (stage 1)         | 1036900 (30.8) | 691968 (33.9)  | 145390 (27.9)   |
| 4  | eGFR $\geq$ 60 to <90 (stage     | 1899314 (56.5) | 1180774 (57.8) | 300183 (57.7)   |
| 5  | 2)                               |                |                |                 |
| 6  | eGFR<60 (stage 3, 4, or          | 427140 (12.7)  | 169856 (8.3)   | 75168 (14.4)    |
| 7  | 5)                               |                |                |                 |
| 8  |                                  |                |                |                 |
| 9  |                                  |                |                |                 |
| 10 | <b>Chronic kidney disease</b>    | 150823 (2.5)   | 47353 (1.3)    | 29236 (3.1)     |
| 11 | <b>(ICD codes)</b>               |                |                |                 |
| 12 |                                  |                |                |                 |
| 13 | <b>Ischemic heart disease</b>    | 999927 (16.4)  | 378832 (10.7)  | 209448 (22.4)   |
| 14 | <b>(ICD codes)</b>               |                |                |                 |
| 15 |                                  |                |                |                 |
| 16 | <b>Heart failure (ICD codes)</b> | 181375 (3)     | 40411 (1.1)    | 41272 (4.4)     |
| 17 |                                  |                |                |                 |
| 18 |                                  |                |                |                 |
| 19 | <b>Peripheral vascular</b>       | 256054 (4.2)   | 77339 (2.2)    | 55242 (5.9)     |
| 20 | <b>disease (ICD codes)</b>       |                |                |                 |
| 21 |                                  |                |                |                 |
| 22 | <b>Stroke (ICD codes)</b>        | 30423 (0.5)    | 10724 (0.3)    | 6275 (0.7)      |
| 23 |                                  |                |                |                 |
| 24 |                                  |                |                |                 |
| 25 | <b>Agent orange exposure</b>     |                |                |                 |
| 26 | <b>(exposed)</b>                 |                |                |                 |
| 27 |                                  |                |                |                 |
| 28 | <b>Chronic hepatitis C</b>       | 102534 (1.7)   | 51789 (1.5)    | 21382 (2.3)     |
| 29 |                                  |                |                |                 |
| 30 | <b>Hyperuricemia</b>             | 180941 (3)     | 74543 (2.1)    | 54981 (5.9)     |
| 31 |                                  |                |                |                 |
| 32 |                                  |                |                |                 |
| 33 | <b>Polycystic ovary syndrome</b> | 4970 (1)       | 3748 (1)       | 798 (1.6)       |
| 34 |                                  |                |                |                 |
| 35 | <b>Gestational diabetes</b>      | 157 (0.03)     | 131 (0.03)     | 22 (0.04)       |
| 36 |                                  |                |                |                 |
| 37 |                                  |                |                |                 |
| 38 | <b>Liver enzymes</b>             |                |                |                 |
| 39 | AST                              | 25.7 (14.3)    | 25.7 (14.2)    | 26.7 (14.7)     |
| 40 | ALT                              | 29.5 (19.8)    | 30.3 (19.9)    | 32.4 (21.1)     |
| 41 |                                  |                |                | 1731271 (28.47) |
| 42 |                                  |                |                | 1634812 (26.88) |
| 43 | Elevated AST (>40 U/L)           | 277,603 (6.4)  | 156,503 (6.2)  | 56,466 (8.3)    |
| 44 | Elevated ALT (>40 U/L)           | 778,931 (17.5) | 482,342 (18.6) | 158,747 (22.8)  |
| 45 |                                  |                |                | 1731271 (28.47) |
| 46 |                                  |                |                | 1634812 (26.88) |
| 47 | <b>Fatty liver disease</b>       | 253134 (10.4)  | 136847 (10.8)  | 67367 (15.7)    |
| 48 |                                  |                |                | 3654047 (60.08) |

\* Only recent (within 2 years of cohort entry) BP measurements were used. Nighttime BP (8 PM to 7 AM) and BP measured in ER were excluded

‡ Hyperlipidemia was defined as: at least 2 ICD-9/10 codes for hyperlipidemia, total cholesterol > 240 mg/dL, or lipid lowering medication use

^ Including those lost to follow up and those died during the study period

† Only patients who completed the follow up and were diabetes free at the end of the study

### Contributorship statement

Dr. Avramovic has full access to all the data in the study and takes responsibility for the integrity of the data and the accuracy of the data analysis.

Concept and design: Schwartz, Thorpe, Hayes, Avramovic, Alemi.

Acquisition, analysis, or interpretation of data: Avramovic, Lopez, Kanchi, Schwartz.

Drafting of the manuscript: Avramovic, Schwartz, Kanchi, Lopez, Thorpe

Critical revision of the manuscript for important intellectual content: All authors, Avramovic, Alemi, Kanchi, Lopez, Hayes, Thorpe, and Schwartz.

Statistical analysis: Kanchi

All authors, Avramovic, Alemi, Kanchi, Lopez, Hayes, Thorpe, and Schwartz, attest that they meet the full authorship criteria.

### Competing interests

The authors report no competing interests.

### Funding

This study was funded by the Centers for Disease Control and Prevention (5 U01DP006299-02-00; PI: LET).

### Data Sharing Statement

To gain access to data from the diabetes cohort described in this profile, interested researchers can contact the corresponding author. Further details

Further details regarding the ability to access VA data can be found on the VA website dedicated to researchers: [https://www.hsrdr.research.va.gov/for\\_researchers/default.cfm](https://www.hsrdr.research.va.gov/for_researchers/default.cfm), including links to policies and guidance documents, special interest groups, funding opportunities, and a link to the VA Informatics and Computing Infrastructure (VINCI) site where access to actual data is granted once appropriate applications have been submitted and approved: [https://www.hsrdr.research.va.gov/for\\_researchers/vinci/](https://www.hsrdr.research.va.gov/for_researchers/vinci/).

### References

1. Centers for Disease Control and Prevention. *Estimates of Diabetes and its Burden in the United States*. Atlanta, GA: U.S. Department of Health and Human Services, Centers for Disease Control and Prevention, 2017;2017.
2. Centers for Disease Control and Prevention. *Underlying Cause of Death 1999-2008*. National Center for Health Statistics;2018.
3. American Diabetes Association. Economic costs of diabetes in the U.S. in 2012. *Diabetes care*. 2013;36(4):1033-1046.

- 1
- 2
- 3
4. Prevention CfDca. Diabetes Quick Facts. 2019; <https://www.cdc.gov/diabetes/basics/quick-facts.html>. Accessed February 27, 2020.
5. Veterans Health Administration. VA Research on Diabetes. 2019.
6. Liu Y, Sayam S, Shao X, et al. Prevalence of and Trends in Diabetes Among Veterans, United States, 2005-2014. *Preventing chronic disease*. 2017;14:E135.
7. Miller D, Safford M, Pogach L. Who has diabetes? Best estimates of diabetes prevalence in the Department of Veterans Affairs based on computerized patient data. *Diabetes care*. 2004;27 Suppl 2:B10-21.
8. Veterans Health Administration. Close to 25 Percent of VA Patients Have Diabetes. 2011; <http://www.va.gov/health/NewsFeatures/20111115a.asp> Accessed December 31, 2015.
9. Breland J, Phibbs C, Hoggatt K, et al. The Obesity Epidemic in the Veterans Health Administration: Prevalence Among Key Populations of Women and Men Veterans. *Journal of general internal medicine*. 2017;32(Suppl 1):11-17.
10. Kondo K, Low A, Everson T, et al. Health Disparities in Veterans: A Map of the Evidence. *Medical care*. 2017;55 Suppl 9 Suppl 2:S9-s15.
11. National Academies of Sciences E, and Medicine. *Veterans and Agent Orange*. National Academies Press;2018.
12. Prevention CfDca. *National Diabetes Prevention Program*. 2019.
13. Group DPPR, Knowler W, Fowler S, et al. 10-year follow-up of diabetes incidence and weight loss in the Diabetes Prevention Program Outcomes Study. *Lancet (London, England)*. 2009;374(9702):1677-1686.
14. Ackermann R, Finch E, Brizendine E, Zhou H, Marrero D. Translating the Diabetes Prevention Program into the community. The DEPLOY Pilot Study. *American journal of preventive medicine*. 2008;35(4):357-363.
15. Ackermann R, Marrero D. Adapting the Diabetes Prevention Program lifestyle intervention for delivery in the community: the YMCA model. *The Diabetes educator*. 2007;33(1):69, 74-65, 77-68.
16. Baker M, Simpson K, Lloyd B, Bauman A, Singh M. Behavioral strategies in diabetes prevention programs: a systematic review of randomized controlled trials. *Diabetes research and clinical practice*. 2011;91(1):1-12.
17. Schellenberg E, Dryden D, Vandermeer B, Ha C, Korownyk C. Lifestyle interventions for patients with and at risk for type 2 diabetes: a systematic review and meta-analysis. *Annals of internal medicine*. 2013;159(8):543-551.
18. Diabetes LEAD (Location, Environmental Attributes, and Disparities) Network. <http://diabetesleadnetwork.org/>. Accessed February 27, 2020.
19. Administration VH. About VHA. <https://www.va.gov/health/aboutvha.asp>. Accessed February 27, 2020.
20. Bowe B, Xie Y, Li T, Yan Y, Xian H, Al-Aly Z. The 2016 global and national burden of diabetes mellitus attributable to PM2.5 air pollution. *The Lancet Planetary health*. 2018;2(7):e301-e312.
21. Davis PJ, Liu M, Sherman S, et al. HbA1c, lipid profiles and risk of incident type 2 Diabetes in United States Veterans. *PloS one*. 2018;13(9):e0203484.
22. Tseng E, Yeh HC, Maruthur NM. Metformin Use in Prediabetes Among U.S. Adults, 2005-2012. *Diabetes care*. 2017;40(7):887-893.
23. Hu R, Li Y, Lv Q, Wu T, Tong N. Acarbose Monotherapy and Type 2 Diabetes Prevention in Eastern and Western Prediabetes: An Ethnicity-specific Meta-analysis. *Clinical therapeutics*. 2015;37(8):1798-1812.
24. Affairs DoV. VA Informatics and Computing Infrastructure (VINCI). 2015; [http://www.hsrp.research.va.gov/for\\_researchers/vinci/](http://www.hsrp.research.va.gov/for_researchers/vinci/). Accessed February 27, 2020.

- 1
  - 2
  - 3
  - 4
  - 5
  - 6
  - 7
  - 8
  - 9
  - 10
  - 11
  - 12
  - 13
  - 14
  - 15
  - 16
  - 17
  - 18
  - 19
  - 20
  - 21
  - 22
  - 23
  - 24
  - 25
  - 26
  - 27
  - 28
  - 29
  - 30
  - 31
  - 32
  - 33
  - 34
  - 35
  - 36
  - 37
  - 38
  - 39
  - 40
  - 41
  - 42
  - 43
  - 44
  - 45
  - 46
  - 47
  - 48
  - 49
  - 50
  - 51
  - 52
  - 53
  - 54
  - 55
  - 56
  - 57
  - 58
  - 59
  - 60
25. Casey J, Schwartz B, Stewart W, Adler N. Using Electronic Health Records for Population Health Research: A Review of Methods and Applications. *Annual review of public health*. 2016;37:61-81.
26. ArcGIS: The mapping and analytics platform. <https://www.esri.com/en-us/arcgis/about-arcgis/overview>.
27. Python. <https://www.python.org/>.
28. QGIS.
29. NHLBI N. Classification of Overweight and Obesity by BMI, Waist Circumference, and Associated Disease Risks. [https://www.nhlbi.nih.gov/health/educational/lose\\_wt/BMI/bmi\\_dis.htm](https://www.nhlbi.nih.gov/health/educational/lose_wt/BMI/bmi_dis.htm). Accessed February 27, 2020.
30. Soohoo M, Moradi H, Obi Y, Kovesdy CP, Kalantar-Zadeh K, Streja E. Serum triglycerides and mortality risk across stages of chronic kidney disease in 2 million U.S. veterans. *Journal of clinical lipidology*. 2019;13(5):744-753.e715.
31. Burg MM, Brandt C, Buta E, et al. Risk for Incident Hypertension Associated With Posttraumatic Stress Disorder in Military Veterans and the Effect of Posttraumatic Stress Disorder Treatment. *Psychosomatic medicine*. 2017;79(2):181-188.
32. Peng M, Chen G, Kaplan GG, et al. Methods of defining hypertension in electronic medical records: validation against national survey data. *Journal of public health (Oxford, England)*. 2016;38(3):e392-e399.
33. Rowan CG, Turner JR, Shah A, Spaeder JA. Antihypertensive treatment and blood pressure control relative to hypertension treatment guidelines. *Pharmacoepidemiology and drug safety*. 2014;23(12):1294-1302.
34. Armstrong C. JNC8 guidelines for the management of hypertension in adults. *American family physician*. 2014;90(7):503-504.
35. Hernandez S, Sylling P, Mor M, et al. Developing an Algorithm for Combining Race and Ethnicity Data Sources in the Veterans Health Administration. *Military medicine*. 2019.
36. Gillett M. International Expert Committee report on the role of the A1C assay in the diagnosis of diabetes. *Diabetes care*. 2009;32(7):1327-1334.
37. Alemi F, Levy C, Kheirbek R. The Multimorbidity Index: A Tool for Assessing the Prognosis of Patients from Their History of Illness. *EGEMS (Wash DC)*. 2016;4(1):1235-1235.

**Figure 1. Cohort Flow Diagram of Diabetes-Free Cohort of US Veterans, 2008–2016**

**Figure 2. Cohort Trends, with cumulative numbers and percentage of patients, 2008 through 2018**

**Figure 3. Geographic distribution of VADR Cohort**

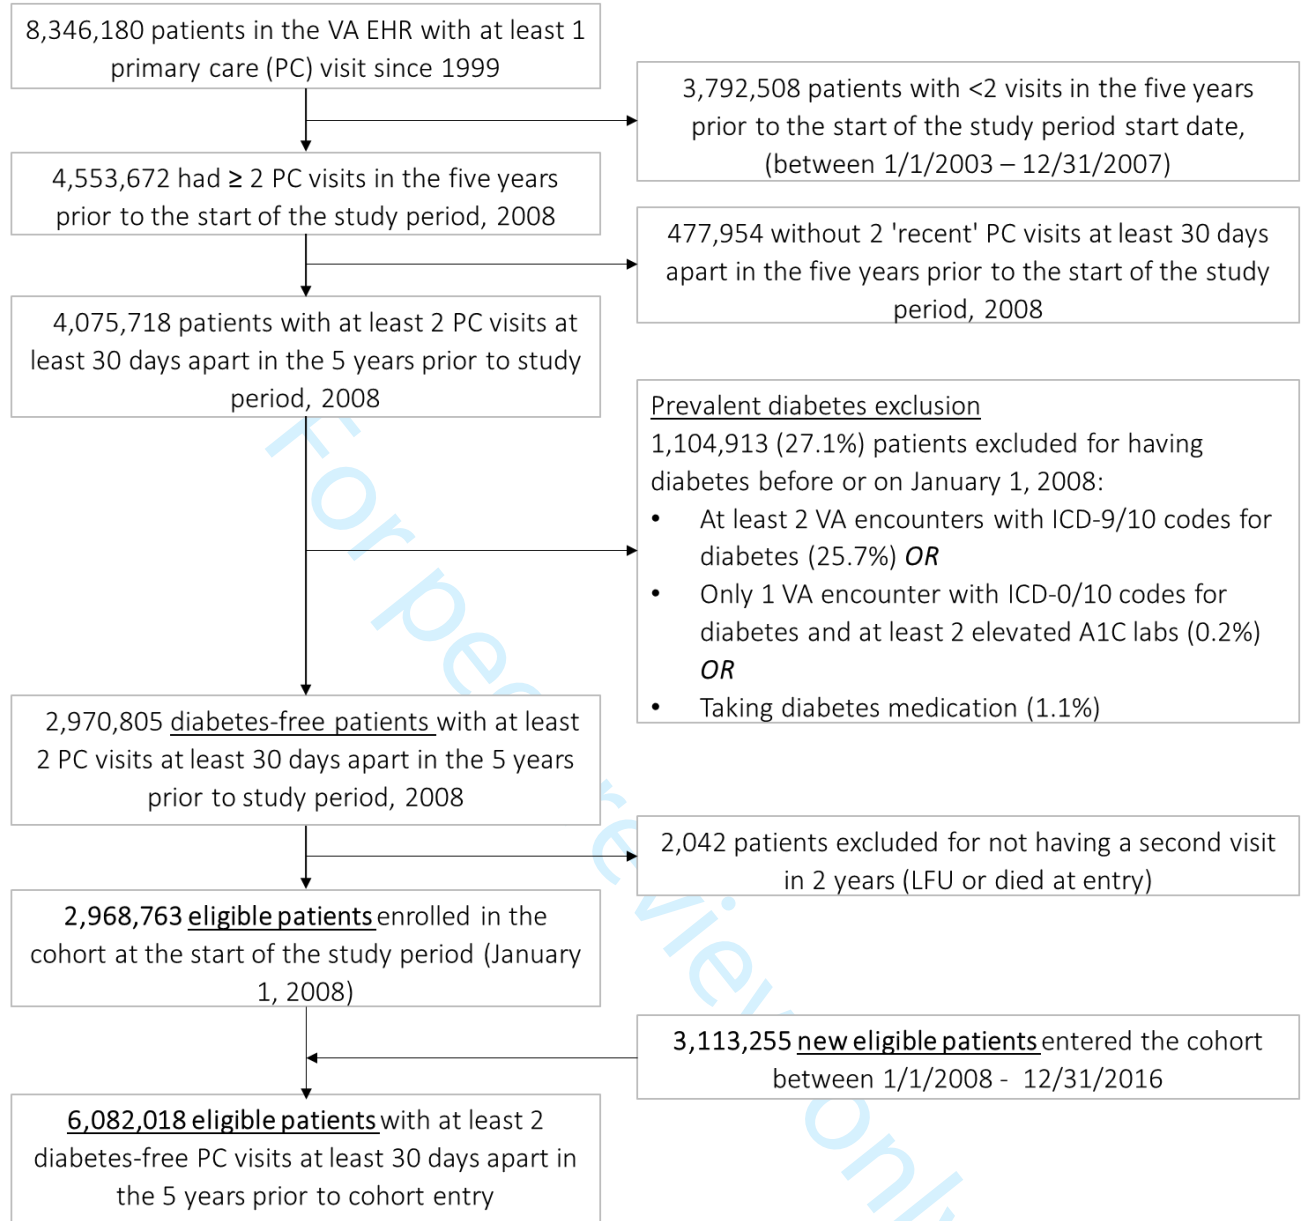

\* Patients with unreliable information on date of birth and date of death and patients with year of birth <1900 were excluded (n=2,248)



1  
2  
3  
4  
5  
6  
7  
8  
9  
10  
11  
12  
13  
14  
15  
16  
17  
18  
19  
20  
21  
22  
23  
24  
25  
26  
27  
28  
29  
30  
31  
32  
33  
34  
35  
36  
37  
38  
39  
40  
41  
42  
43  
44  
45  
46  
47  
48  
49  
50  
51  
52  
53  
54  
55  
56  
57  
58  
59  
60

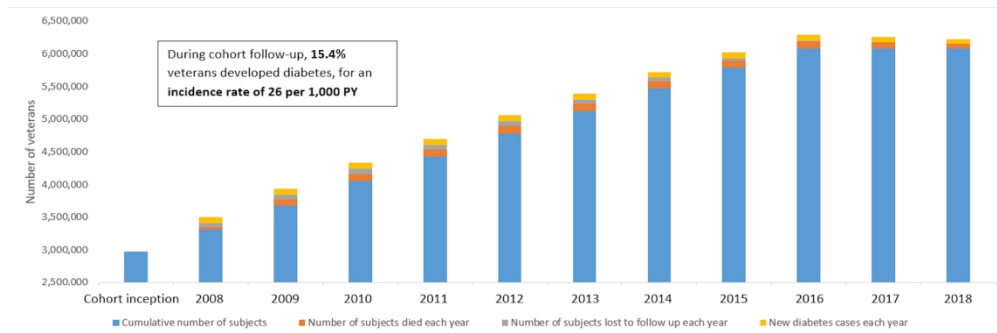

Figure 2. Cohort Trends, with cumulative numbers and percentage of patients, 2008 through 2018

1  
2  
3  
4  
5  
6  
7  
8  
9  
10  
11  
12  
13  
14  
15  
16  
17  
18  
19  
20  
21  
22  
23  
24  
25  
26  
27  
28  
29  
30  
31  
32  
33  
34  
35  
36  
37  
38  
39  
40  
41  
42  
43  
44  
45  
46  
47  
48  
49  
50  
51  
52  
53  
54  
55  
56  
57  
58  
59  
60



Figure 3. Geographic distribution of VADR Cohort  
179x127mm (300 x 300 DPI)

| 1<br>2<br>3 | 4<br>5<br>6<br>7<br>8<br>9<br>10<br>11<br>12<br>13<br>14<br>15<br>16<br>17<br>18<br>19<br>20<br>21<br>22<br>23<br>24<br>25<br>26<br>27<br>28<br>29<br>30<br>31<br>32<br>33<br>34<br>35<br>36<br>37<br>38<br>39<br>40<br>41<br>42<br>43<br>44<br>45 | Details                                                                                                                                                                                                                                                                                                                                                                                                                                                                                                                                                                                                                                                                                                                                                                                                                                                                                                                               |                                                                                                                                                                                                                                                  |                                                                                                                                                                                                                                                                                                                                                                                                                                                                                                                                                                                                                                                                                                                                                                                      |                                                                                                                                                            |                                                                                                                                                                                                                                                       |              |       |
|-------------|----------------------------------------------------------------------------------------------------------------------------------------------------------------------------------------------------------------------------------------------------|---------------------------------------------------------------------------------------------------------------------------------------------------------------------------------------------------------------------------------------------------------------------------------------------------------------------------------------------------------------------------------------------------------------------------------------------------------------------------------------------------------------------------------------------------------------------------------------------------------------------------------------------------------------------------------------------------------------------------------------------------------------------------------------------------------------------------------------------------------------------------------------------------------------------------------------|--------------------------------------------------------------------------------------------------------------------------------------------------------------------------------------------------------------------------------------------------|--------------------------------------------------------------------------------------------------------------------------------------------------------------------------------------------------------------------------------------------------------------------------------------------------------------------------------------------------------------------------------------------------------------------------------------------------------------------------------------------------------------------------------------------------------------------------------------------------------------------------------------------------------------------------------------------------------------------------------------------------------------------------------------|------------------------------------------------------------------------------------------------------------------------------------------------------------|-------------------------------------------------------------------------------------------------------------------------------------------------------------------------------------------------------------------------------------------------------|--------------|-------|
|             |                                                                                                                                                                                                                                                    | Component                                                                                                                                                                                                                                                                                                                                                                                                                                                                                                                                                                                                                                                                                                                                                                                                                                                                                                                             | Definition                                                                                                                                                                                                                                       | ICD codes                                                                                                                                                                                                                                                                                                                                                                                                                                                                                                                                                                                                                                                                                                                                                                            |                                                                                                                                                            | Labs                                                                                                                                                                                                                                                  | Medications* | Other |
|             |                                                                                                                                                                                                                                                    |                                                                                                                                                                                                                                                                                                                                                                                                                                                                                                                                                                                                                                                                                                                                                                                                                                                                                                                                       |                                                                                                                                                                                                                                                  | ICD-9                                                                                                                                                                                                                                                                                                                                                                                                                                                                                                                                                                                                                                                                                                                                                                                | ICD-10                                                                                                                                                     |                                                                                                                                                                                                                                                       |              |       |
|             |                                                                                                                                                                                                                                                    | <p>(1) At least two encounters (inpatient or outpatient) with documentation of a Type 2 diabetes ICD-9/10 code (ICD-9: 250.x; ICD-10: E11.x), <i>or</i></p> <p>(2) a documented prescription for a diabetes medication other than metformin or acarbose alone, <i>or</i></p> <p>(3) at least one encounter with a diabetes ICD-9/10 code and two elevated (<math>\geq 6.5\%</math>) glycosylated hemoglobin (Hgb A1C) lab test results</p> <ul style="list-style-type: none"> <li>• Implausible A1C labs removed (range based on NHANES reporting)</li> <li>• Multiple labs measured on the same day or on the same day and time were averaged if they ranged within 1%</li> <li>• A1C labs ranging <math>&gt;1\%</math> were removed</li> <li>• If only one A1C lab was available prior to cohort entry date, that lab was used.</li> <li>• If more than one A1C lab was available, the average of the last two was taken</li> </ul> | <p>250, 250.0, 250.00, 250.02, 250.1, 250.10, 250.12, 250.2, 250.20, 250.22, 250.3, 250.30, 250.32, 250.4, 250.40, 250.42, 250.5, 250.50, 250.52, 250.6, 250.60, 250.62, 250.7, 250.70, 250.72, 250.8, 250.80, 250.82, 250.9, 250.90, 250.92</p> | <p>E11.00, E11.01, E11.21, E11.22, E11.29, E11.311, E11.319, E11.321, E11.3211, E11.3212, E11.3213, E11.3219, E11.329, E11.3291, E11.3292, E11.3293, E11.3299, E11.331, E11.3311, E11.3312, E11.3313, E11.3319, E11.339, E11.3391, E11.3392, E11.3393, E11.3399, E11.341, E11.3411, E11.3412, E11.3413, E11.3419, E11.349, E11.3491, E11.3492, E11.3493, E11.3499, E11.351, E11.3511, E11.3512, E11.3513, E11.3519, E11.352, E11.3521, E11.3522, E11.3523, E11.3529, E11.353, E11.3531, E11.3532, E11.3533, E11.3539, E11.354, E11.3541, E11.3542, E11.3543, E11.3549, E11.355, E11.3551, E11.3552, E11.3553, E11.3559, E11.359, E11.3591, E11.3592, E11.3593, E11.3599, E11.36, E11.37, E11.37X1, E11.37X2, E11.37X3, E11.37X9, E11.39, E11.40, E11.41, E11.42, E11.43, E11.44,</p> | <p>LOINC code corresponding to A1C:</p> <ul style="list-style-type: none"> <li>• 17855-8</li> <li>• 17856-6</li> <li>• 4548-4</li> <li>• 4549-2</li> </ul> | <p>Chloropropamide, glipizide, glyburide, glimepiride, metformin, repaglinide, nateglinide, tosiglitazone, pioglitazone, sitagliptin, saxagliptin, linagliptin, alogliptin, canagliflozin, dapagliflozin, acarbose, meglitol, colesevlam, insulin</p> |              |       |

|                             |                                                                                                                                                                                                                                                                                                                                                                                                                                                                                                                                                                         |   |                                                                                                                                                                             |                                                                                                                                                             |   |                                 |
|-----------------------------|-------------------------------------------------------------------------------------------------------------------------------------------------------------------------------------------------------------------------------------------------------------------------------------------------------------------------------------------------------------------------------------------------------------------------------------------------------------------------------------------------------------------------------------------------------------------------|---|-----------------------------------------------------------------------------------------------------------------------------------------------------------------------------|-------------------------------------------------------------------------------------------------------------------------------------------------------------|---|---------------------------------|
|                             |                                                                                                                                                                                                                                                                                                                                                                                                                                                                                                                                                                         |   | E11.49, E11.51, E11.52,<br>E11.59, E11.610,<br>E11.618, E11.620,<br>E11.621, E11.622,<br>E11.628, E11.630,<br>E11.638, E11.641,<br>E11.649, E11.65,<br>E11.69, E11.8, E11.9 |                                                                                                                                                             |   |                                 |
| <p><b>Comorbidities</b></p> |                                                                                                                                                                                                                                                                                                                                                                                                                                                                                                                                                                         |   |                                                                                                                                                                             |                                                                                                                                                             |   |                                 |
| <p>A1C<sup>4-10</sup></p>   | <p>(1) Mean and standard deviation calculated after identifying labs using LOINC codes</p> <ul style="list-style-type: none"> <li>• Implausible A1C labs removed (range based on NHANES reporting)</li> <li>• Multiple labs measured on the same day or on the same day and time were averaged if they ranged within 1%</li> <li>• A1C labs ranging &gt;1% were removed</li> <li>• If only one A1C lab was available prior to cohort entry date, that lab was used.</li> <li>• If more than one A1C lab was available, the average of the last two was taken</li> </ul> | - | -                                                                                                                                                                           | LOINC code corresponding to <u>A1C</u> : <ul style="list-style-type: none"> <li>• 17855-8</li> <li>• 17856-6</li> <li>• 4548-4</li> <li>• 4549-2</li> </ul> | - |                                 |
| <p>BMI<sup>11-14</sup></p>  | <p>(1) Calculated as weight (Kg)/[height(m)]<sup>2</sup>. Normal weight defined as BMI &lt; 25, Overweight defined as ≥25 and &lt;30, and Obese as ≥30</p> <p><u>Height:</u></p> <ul style="list-style-type: none"> <li>• Implausible values removed (range based on published literature)</li> </ul>                                                                                                                                                                                                                                                                   | - | -                                                                                                                                                                           | -                                                                                                                                                           | - | Obtained by vital signs records |

- Multiple heights recorded during the same visit were averaged if they ranged within 3 inches (7.62 cm) or less
- Measurements ranging more than 3 inches were deleted
- If only one height measurement was available prior to cohort entry date, that height was used
- If more than one height measurement was available prior to cohort entry date, the average of the last two was taken

Weight:

- Implausible values removed (range based on published literature)
- Multiple weights recorded during the same visit were averaged if they ranged within 10 lb (4.536 Kg) or less. Measurements ranging more than 10 lb were deleted
- If only one weight measurement was available prior to cohort entry date, that weight was used
- If more than one weight measurement was available prior to cohort entry date, the average of the last two was taken

For peer review only

1  
2  
3  
4  
5  
6  
7  
8  
9  
10  
11  
12  
13  
14  
15  
16  
17  
18  
19  
20  
21  
22  
23  
24  
25  
26  
27  
28  
29  
30  
31  
32  
33  
34  
35  
36  
37  
38  
39  
40  
41  
42  
43  
44  
45  
46  
47

|                                            |                                                                                |          |          |          |          |                                        |
|--------------------------------------------|--------------------------------------------------------------------------------|----------|----------|----------|----------|----------------------------------------|
| <p>Blood Pressure (BP)<sup>15-19</sup></p> | <p>(1) Mean and standard deviation of systolic and diastolic BP calculated</p> | <p>-</p> | <p>-</p> | <p>-</p> | <p>-</p> | <p>Obtained by vital signs records</p> |
|--------------------------------------------|--------------------------------------------------------------------------------|----------|----------|----------|----------|----------------------------------------|

1  
2  
3  
4  
5  
6  
7  
8  
9  
10  
11  
12  
13  
14  
15  
16  
17  
18  
19  
20  
21  
22  
23  
24  
25  
26  
27  
28  
29  
30  
31  
32  
33  
34  
35  
36  
37  
38  
39  
40  
41  
42  
43  
44  
45  
46  
47

|                                     |                                                                                                                                                                                                                                                                                                                                                                                                                                                                                                                                                                 |                                                                      |                                                                                                                                                           |                                                                                                                                        |                                                                                                                                                                                                                                                                                                                                  |
|-------------------------------------|-----------------------------------------------------------------------------------------------------------------------------------------------------------------------------------------------------------------------------------------------------------------------------------------------------------------------------------------------------------------------------------------------------------------------------------------------------------------------------------------------------------------------------------------------------------------|----------------------------------------------------------------------|-----------------------------------------------------------------------------------------------------------------------------------------------------------|----------------------------------------------------------------------------------------------------------------------------------------|----------------------------------------------------------------------------------------------------------------------------------------------------------------------------------------------------------------------------------------------------------------------------------------------------------------------------------|
|                                     | <ul style="list-style-type: none"> <li>Records deleted if measured at nighttime (8pm to 7am) or if diastolic BP was greater than systolic BP</li> <li>Only BP measured within the 2 years prior to cohort entry was included</li> <li>BP measured on the same day was averaged</li> <li>If only one BP measured was available on, or prior to, cohort entry date, it was used as the baseline BP</li> <li>If more than one BP was available on, or prior to, cohort entry date, the average of the last two measurements was used as the baseline BP</li> </ul> |                                                                      |                                                                                                                                                           |                                                                                                                                        |                                                                                                                                                                                                                                                                                                                                  |
| Hypertension (HTN) <sup>20-24</sup> | (1) At least one ICD-9/10 code for HTN                                                                                                                                                                                                                                                                                                                                                                                                                                                                                                                          | 401.0, 401.1, 401.9                                                  | I10.X                                                                                                                                                     | -                                                                                                                                      | -                                                                                                                                                                                                                                                                                                                                |
| Hyperlipidemia <sup>25,26</sup>     | <p>(1) Elevated total cholesterol (&gt;240 mg/dL), <i>or</i></p> <p>(2) Lipid-lowering medication use, <i>or</i></p> <p>(3) at least 2 ICD-9/10 codes documenting hyperlipidemia</p>                                                                                                                                                                                                                                                                                                                                                                            | 272.0, 272.1, 272.2, 272.3, 272.4, 272.5, 272.6, 272.7, 272.8, 272.9 | E78, E78.0, E78.00, E78.01, E78.1, E78.2, E78.3, E78.4, E78.41, E78.49, E78.5, E78.6, E78.7, E78.70, E78.71, E78.72, E78.79, E78.8, E78.81, E78.89, E78.9 | <p>LOINC code corresponding to <u>Total cholesterol</u>:</p> <ul style="list-style-type: none"> <li>2093-3</li> <li>14647-2</li> </ul> | <p>Generic names for class "CV350":</p> <ul style="list-style-type: none"> <li>Atorvastatin</li> <li>Cholestyramin</li> <li>Colestipol</li> <li>Ezetimibe</li> <li>Ezetimibe/Simvastatin</li> <li>Gemfibrozil</li> <li>Lomitapide</li> <li>Mipomerson</li> <li>Pravastatin</li> <li>Rosuvastatin</li> <li>Simvastatin</li> </ul> |

|                                                                                                                                           |                                                    |                                                                                                                                                                                                                                                                                                                                                                                                                                                                                                                                                                                                                                                                 |                                                                                                                                            |                                          |                                                                                                                                                                                                                                                                                                                                                                                                                                                                              |   |   |
|-------------------------------------------------------------------------------------------------------------------------------------------|----------------------------------------------------|-----------------------------------------------------------------------------------------------------------------------------------------------------------------------------------------------------------------------------------------------------------------------------------------------------------------------------------------------------------------------------------------------------------------------------------------------------------------------------------------------------------------------------------------------------------------------------------------------------------------------------------------------------------------|--------------------------------------------------------------------------------------------------------------------------------------------|------------------------------------------|------------------------------------------------------------------------------------------------------------------------------------------------------------------------------------------------------------------------------------------------------------------------------------------------------------------------------------------------------------------------------------------------------------------------------------------------------------------------------|---|---|
| 1<br>2<br>3<br>4<br>5<br>6<br>7<br>8<br>9<br>10<br>11<br>12<br>13<br>14<br>15<br>16<br>17<br>18<br>19<br>20<br>21<br>22<br>23<br>24<br>25 | Lipids (HDL, LDL, Triglycerides) <sup>25-27</sup>  | (1) Mean and standard deviation calculated after identifying labs using LOINC codes <ul style="list-style-type: none"> <li>• Implausible values removed (range based on NHANES reporting)</li> <li>• The median of different lab values completed at the same day was taken</li> <li>• Lab values that are 50% &gt; or &lt; the median were considered outliers and removed</li> <li>• The median of the rest of the labs was taken as the lab value for that day</li> <li>• For all, if only one lab was available prior to the cohort entry date, that lab was used. If more than 1 lab value was available, the average of the last two was taken</li> </ul> | -                                                                                                                                          | -                                        | LOINC codes corresponding to:<br><u>HDL:</u> <ul style="list-style-type: none"> <li>• 2085-9</li> <li>• 18263-4</li> <li>• 9832-7</li> </ul> <u>LDL:</u> <ul style="list-style-type: none"> <li>• 13457-7</li> <li>• 18262-6</li> <li>• 2089-1</li> <li>• 14155-6</li> </ul> <u>Triglycerides:</u> <ul style="list-style-type: none"> <li>• 2571-8</li> <li>• 14927-8</li> <li>• 12228-3</li> <li>• 3049-4</li> <li>• 1644-4</li> <li>• 12951-0</li> <li>• 3048-6</li> </ul> | - | - |
| 26<br>27                                                                                                                                  | Chronic Kidney Disease (CKD) <sup>24,28,29</sup>   | (1) At least one ICD-9/10 code documenting CKD                                                                                                                                                                                                                                                                                                                                                                                                                                                                                                                                                                                                                  | 585.5X                                                                                                                                     | N18.X                                    | -                                                                                                                                                                                                                                                                                                                                                                                                                                                                            | - | - |
| 28<br>29<br>30                                                                                                                            | Ischemic Heart Disease <sup>30</sup>               | (1) At least one ICD-9/10 code documenting ischemic heart disease                                                                                                                                                                                                                                                                                                                                                                                                                                                                                                                                                                                               | 410.X, 411.X, 412.X, 413.X, 414.X                                                                                                          | I20.X, I21.X, I22.X, I23.X, I24.X, I25.X | -                                                                                                                                                                                                                                                                                                                                                                                                                                                                            | - | - |
| 31<br>32                                                                                                                                  | Heart Failure <sup>30,31</sup>                     | (1) At least one ICD-9/10 code documenting heart failure                                                                                                                                                                                                                                                                                                                                                                                                                                                                                                                                                                                                        | 428.X                                                                                                                                      | I50.X                                    | -                                                                                                                                                                                                                                                                                                                                                                                                                                                                            | - | - |
| 33<br>34<br>35<br>36<br>37<br>38                                                                                                          | Peripheral Vascular Disease (PVD) <sup>30,31</sup> | (1) At least one ICD-9/10 code documenting PVD                                                                                                                                                                                                                                                                                                                                                                                                                                                                                                                                                                                                                  | 440.0, 440.1, 440.2, 440.20, 440.21, 440.22, 440.23, 440.29, 440.4, 440.8, 440.9, 443.9, 557.0, 557.1, 557.9                               | I73.X                                    | -                                                                                                                                                                                                                                                                                                                                                                                                                                                                            | - | - |
| 39<br>40<br>41<br>42<br>43<br>44<br>45                                                                                                    | Stroke                                             | (1) At least one ICD-9/10 code documenting stroke                                                                                                                                                                                                                                                                                                                                                                                                                                                                                                                                                                                                               | 346.60, 346.61, 346.62, 346.63, 432.0, 432.1, 432.9, 433.01, 433.11, 433.21, 433.31, 433.81, 433.91, 434.0, 434.00, 434.01, 434.1, 434.10, | I63.X                                    | -                                                                                                                                                                                                                                                                                                                                                                                                                                                                            | - | - |

|    |                              |                                                                                                                                                                                                                                                                                                                                                                                                                                                                                                                                                                                                                                                                                                                                                   |                |                |                                                                                                                                          |                               |
|----|------------------------------|---------------------------------------------------------------------------------------------------------------------------------------------------------------------------------------------------------------------------------------------------------------------------------------------------------------------------------------------------------------------------------------------------------------------------------------------------------------------------------------------------------------------------------------------------------------------------------------------------------------------------------------------------------------------------------------------------------------------------------------------------|----------------|----------------|------------------------------------------------------------------------------------------------------------------------------------------|-------------------------------|
| 1  |                              | 434.11, 434.9, 434.90,<br>434.91, 436.5, 430.X,<br>431.X                                                                                                                                                                                                                                                                                                                                                                                                                                                                                                                                                                                                                                                                                          |                |                |                                                                                                                                          |                               |
| 2  | Agent Orange                 | (1) "Agent orange" flag was<br>used to generate the number of<br>people with this exposure                                                                                                                                                                                                                                                                                                                                                                                                                                                                                                                                                                                                                                                        | -              | -              | -                                                                                                                                        | -                             |
| 3  |                              |                                                                                                                                                                                                                                                                                                                                                                                                                                                                                                                                                                                                                                                                                                                                                   |                |                |                                                                                                                                          | From patient<br>problem lists |
| 4  | Hepatitis C                  | (1) At least one ICD-9/10 code<br>documenting Hepatitis C                                                                                                                                                                                                                                                                                                                                                                                                                                                                                                                                                                                                                                                                                         | 070.54         | B18.2          | -                                                                                                                                        | -                             |
| 5  |                              |                                                                                                                                                                                                                                                                                                                                                                                                                                                                                                                                                                                                                                                                                                                                                   |                |                |                                                                                                                                          | -                             |
| 6  | Hyperuricemia                | (1) At least one ICD-9/10 code<br>documenting Hyperuricemia                                                                                                                                                                                                                                                                                                                                                                                                                                                                                                                                                                                                                                                                                       | 790.6          | E79.0          | -                                                                                                                                        | -                             |
| 7  |                              |                                                                                                                                                                                                                                                                                                                                                                                                                                                                                                                                                                                                                                                                                                                                                   |                |                |                                                                                                                                          | -                             |
| 8  | Polycystic Ovary<br>Syndrome | (1) At least one ICD-9/10 code<br>documenting Polycystic Ovary<br>Syndrome                                                                                                                                                                                                                                                                                                                                                                                                                                                                                                                                                                                                                                                                        | 256.4          | E28.2          | -                                                                                                                                        | -                             |
| 9  |                              |                                                                                                                                                                                                                                                                                                                                                                                                                                                                                                                                                                                                                                                                                                                                                   |                |                |                                                                                                                                          | -                             |
| 10 | Gestational<br>Diabetes      | (1) At least one ICD-9/10 code<br>documenting Gestational<br>Diabetes                                                                                                                                                                                                                                                                                                                                                                                                                                                                                                                                                                                                                                                                             | V12.21, 648.83 | Z86.32, 024.4X | -                                                                                                                                        | -                             |
| 11 |                              |                                                                                                                                                                                                                                                                                                                                                                                                                                                                                                                                                                                                                                                                                                                                                   |                |                |                                                                                                                                          | -                             |
| 12 | eGFR <sup>32,33</sup>        | (1) Mean and standard<br>deviation calculated after<br>identifying labs using LOINC<br>codes<br><ul style="list-style-type: none"><li>• Implausible eGFR values<br/>were excluded</li><li>• The median of eGFR<br/>measured on the same day<br/>was taken, then values<br/>more than 50% different<br/>than the median were<br/>excluded as outliers</li><li>• The median of the rest of<br/>the measures was taken as<br/>eGFR for that day</li><li>• If only one eGFR was<br/>available prior to cohort<br/>entry date, it was taken as<br/>the baseline estimate</li><li>• If more than one eGFR was<br/>available prior to cohort<br/>entry date, the average of<br/>the most recent two was<br/>taken as the baseline<br/>estimate</li></ul> | -              | -              | LOINC code<br>corresponding<br>to eGFR:<br><ul style="list-style-type: none"><li>• 62238-1</li><li>• 48643-1</li><li>• 33914-3</li></ul> | -                             |
| 13 |                              |                                                                                                                                                                                                                                                                                                                                                                                                                                                                                                                                                                                                                                                                                                                                                   |                |                |                                                                                                                                          | -                             |
| 14 |                              |                                                                                                                                                                                                                                                                                                                                                                                                                                                                                                                                                                                                                                                                                                                                                   |                |                |                                                                                                                                          | -                             |
| 15 |                              |                                                                                                                                                                                                                                                                                                                                                                                                                                                                                                                                                                                                                                                                                                                                                   |                |                |                                                                                                                                          | -                             |
| 16 |                              |                                                                                                                                                                                                                                                                                                                                                                                                                                                                                                                                                                                                                                                                                                                                                   |                |                |                                                                                                                                          | -                             |
| 17 |                              |                                                                                                                                                                                                                                                                                                                                                                                                                                                                                                                                                                                                                                                                                                                                                   |                |                |                                                                                                                                          | -                             |
| 18 |                              |                                                                                                                                                                                                                                                                                                                                                                                                                                                                                                                                                                                                                                                                                                                                                   |                |                |                                                                                                                                          | -                             |
| 19 |                              |                                                                                                                                                                                                                                                                                                                                                                                                                                                                                                                                                                                                                                                                                                                                                   |                |                |                                                                                                                                          | -                             |
| 20 |                              |                                                                                                                                                                                                                                                                                                                                                                                                                                                                                                                                                                                                                                                                                                                                                   |                |                |                                                                                                                                          | -                             |
| 21 |                              |                                                                                                                                                                                                                                                                                                                                                                                                                                                                                                                                                                                                                                                                                                                                                   |                |                |                                                                                                                                          | -                             |
| 22 |                              |                                                                                                                                                                                                                                                                                                                                                                                                                                                                                                                                                                                                                                                                                                                                                   |                |                |                                                                                                                                          | -                             |
| 23 |                              |                                                                                                                                                                                                                                                                                                                                                                                                                                                                                                                                                                                                                                                                                                                                                   |                |                |                                                                                                                                          | -                             |
| 24 |                              |                                                                                                                                                                                                                                                                                                                                                                                                                                                                                                                                                                                                                                                                                                                                                   |                |                |                                                                                                                                          | -                             |
| 25 |                              |                                                                                                                                                                                                                                                                                                                                                                                                                                                                                                                                                                                                                                                                                                                                                   |                |                |                                                                                                                                          | -                             |
| 26 |                              |                                                                                                                                                                                                                                                                                                                                                                                                                                                                                                                                                                                                                                                                                                                                                   |                |                |                                                                                                                                          | -                             |
| 27 |                              |                                                                                                                                                                                                                                                                                                                                                                                                                                                                                                                                                                                                                                                                                                                                                   |                |                |                                                                                                                                          | -                             |
| 28 |                              |                                                                                                                                                                                                                                                                                                                                                                                                                                                                                                                                                                                                                                                                                                                                                   |                |                |                                                                                                                                          | -                             |
| 29 |                              |                                                                                                                                                                                                                                                                                                                                                                                                                                                                                                                                                                                                                                                                                                                                                   |                |                |                                                                                                                                          | -                             |
| 30 |                              |                                                                                                                                                                                                                                                                                                                                                                                                                                                                                                                                                                                                                                                                                                                                                   |                |                |                                                                                                                                          | -                             |
| 31 |                              |                                                                                                                                                                                                                                                                                                                                                                                                                                                                                                                                                                                                                                                                                                                                                   |                |                |                                                                                                                                          | -                             |
| 32 |                              |                                                                                                                                                                                                                                                                                                                                                                                                                                                                                                                                                                                                                                                                                                                                                   |                |                |                                                                                                                                          | -                             |
| 33 |                              |                                                                                                                                                                                                                                                                                                                                                                                                                                                                                                                                                                                                                                                                                                                                                   |                |                |                                                                                                                                          | -                             |
| 34 |                              |                                                                                                                                                                                                                                                                                                                                                                                                                                                                                                                                                                                                                                                                                                                                                   |                |                |                                                                                                                                          | -                             |
| 35 |                              |                                                                                                                                                                                                                                                                                                                                                                                                                                                                                                                                                                                                                                                                                                                                                   |                |                |                                                                                                                                          | -                             |
| 36 |                              |                                                                                                                                                                                                                                                                                                                                                                                                                                                                                                                                                                                                                                                                                                                                                   |                |                |                                                                                                                                          | -                             |
| 37 |                              |                                                                                                                                                                                                                                                                                                                                                                                                                                                                                                                                                                                                                                                                                                                                                   |                |                |                                                                                                                                          | -                             |
| 38 |                              |                                                                                                                                                                                                                                                                                                                                                                                                                                                                                                                                                                                                                                                                                                                                                   |                |                |                                                                                                                                          | -                             |
| 39 |                              |                                                                                                                                                                                                                                                                                                                                                                                                                                                                                                                                                                                                                                                                                                                                                   |                |                |                                                                                                                                          | -                             |
| 40 |                              |                                                                                                                                                                                                                                                                                                                                                                                                                                                                                                                                                                                                                                                                                                                                                   |                |                |                                                                                                                                          | -                             |
| 41 |                              |                                                                                                                                                                                                                                                                                                                                                                                                                                                                                                                                                                                                                                                                                                                                                   |                |                |                                                                                                                                          | -                             |
| 42 |                              |                                                                                                                                                                                                                                                                                                                                                                                                                                                                                                                                                                                                                                                                                                                                                   |                |                |                                                                                                                                          | -                             |
| 43 |                              |                                                                                                                                                                                                                                                                                                                                                                                                                                                                                                                                                                                                                                                                                                                                                   |                |                |                                                                                                                                          | -                             |
| 44 |                              |                                                                                                                                                                                                                                                                                                                                                                                                                                                                                                                                                                                                                                                                                                                                                   |                |                |                                                                                                                                          | -                             |



1  
2  
3  
4  
5  
6  
7  
8  
9  
10  
11  
12  
13  
14  
15  
16  
17  
18  
19  
20  
21  
22  
23  
24  
25  
26  
27  
28  
29  
30  
31  
32  
33  
34  
35  
36  
37  
38  
39  
40  
41  
42  
43  
44  
45  
46  
47

Liver enzymes

(1) Mean and standard deviation calculated after identifying labs using LOINC codes

- Implausible values removed (range based on NHANES reporting)
- The median of different lab values completed at the same day was taken
- Lab values that are 50% > or < the median were considered outliers and removed
- The median of the rest of the labs was taken as the lab value for that day

For all, if only one lab was available prior to the cohort entry date, that lab was used. If more than 1 lab value was available, the average of the last two was taken

LOINC codes corresponding to

AST:

- 14409-7
- 14410-5
- 43822-6
- 88112-8
- 14412-1
- 14414-7
- 16412-9
- 1918-2
- 27344-1
- 14413-9
- 1917-4
- 1919-0
- 1920-8
- 30239-8
- 14411-3
- 44786-2

ALT:

- 1741-8
- 25302-1
- 54491-6
- 1742-6
- 1743-4
- 44785-4
- 16324-6
- 50168-4
- 76625-3
- 1744-2
- 54492-4
- 77144-4

Exclusions:

- Patients with hepatitis B and C (ICD-9: 070.2x, 070.3x, 070.41, 070.44, 070.51, 070.51, 070.54, 070.7x. ICD-10: B18.x)
- alcohol abuse (ICD-9: 291.x, 303.0x, 303.9x, 305.0x. ICD-10 F10.x)
- patients with other rare liver disease (ICD-9: 576.1, 275.03, 275.01, 275.1, 237.4, 571.42, 571.6, 275.09. ICD-10: 237.4, D44.0, D44.2, D44.9, 275.01, E83.110, 275.03, E83.118, E83.119, 275.09, E83.10, E83.19, 275.1, E83.00, E83.01, E83.09, 571.42, K75.4, 571.6, K74.3, K74.4, K74.5, 576.1, K83.0)

At least 2 elevated ALT ( $\geq 40$  U/L) at least 6 months apart within 2 years

1  
2  
3  
4  
5  
6  
7  
8  
9  
10  
11  
12  
13  
14  
15  
16  
17  
18  
19  
20  
21  
22  
23  
24  
25  
26  
27  
28  
29  
30  
31  
32  
33  
34  
35

Fatty liver disease<sup>34</sup>

For peer review only

Exclusions:

- Patients with hepatitis B and C (ICD-9: 070.2x, 070.3x, 070.41, 070.44, 070.51, 070.51, 070.54, 070.7x. ICD-10: B18.x)
- alcohol abuse (ICD-9: 291.x, 303.0x, 303.9x, 305.0x. ICD-10 F10.x)
- patients with other rare liver disease (ICD-9: 576.1, 275.03, 275.01, 275.1, 237.4, 571.42, 571.6, 275.09. ICD-10: 237.4, D44.0, D44.2, D44.9, 275.01, E83.110, 275.03, E83.118, E83.119, 275.09, E83.10, E83.19, 275.1, E83.00, E83.01, E83.09, 571.42, K75.4, 571.6, K74.3, K74.4, K74.5, 576.1, K83.0)

36 Medications are documented prescriptions, not prescriptions filled

37  
38  
39  
40  
41  
42  
43  
44  
45  
46  
47

References

1. Jones CD, Greenwood RH, Misra A, Bachmann MO. Incidence and progression of diabetic retinopathy during 17 years of a population-based screening program in England. *Diabetes care*. 2012;35(3):592-596.

2. Parikh SV, Saya S, Divanji P, et al. Risk of death and myocardial infarction in patients with peripheral arterial disease undergoing percutaneous coronary intervention (from the National Heart, Lung and Blood Institute Dynamic Registry). *The American journal of cardiology*. 2011;107(7):959-964.

3. Rassen JA, Bartels DB, Schneeweiss S, Patrick AR, Murk W. Measuring prevalence and incidence of chronic conditions in claims and electronic health record databases. *Clinical epidemiology*. 2019;11:1-15.
14. Carls G, Huynh J, Tuttle E, Yee J, Edelman SV. Achievement of Glycated Hemoglobin Goals in the US Remains Unchanged Through 2014. *Diabetes Ther*. 2017;8(4):863-873.
35. Pani LN, Korenda L, Meigs JB, et al. Effect of aging on A1C levels in individuals without diabetes: evidence from the Framingham Offspring Study and the National Health and Nutrition Examination Survey 2001-2004. *Diabetes care*. 2008;31(10):1991-1996.
56. Nicolo M, Boullata JI. Serum 25OHD concentration as a predictor of haemoglobin A1c among adults living in the USA: NHANES 2003 to 2010. *BMJ Nutrition, Prevention & Health*. 2019:bmjnph-2019-000029.
7. Davis PJ, Liu M, Sherman S, et al. HbA1c, lipid profiles and risk of incident type 2 Diabetes in United States Veterans. *PloS one*. 2018;13(9):e0203484.
8. Gillett M. International Expert Committee report on the role of the A1C assay in the diagnosis of diabetes. *Diabetes care*. 2009;32(7):1327-1334.
9. *Laboratory Procedure Manual: Glycohemoglobin*
10. Heinemann LF, G. Quality of HbA1c measurement in the practice: The german perspective. *J Diabetes Science and Technology*. 2015;9(3):687-695.
11. Fryar CK-M, D; Gu, Q; Ogden, CL. Mean body weight, height, waist circumference, and body mass index among adults: United States, 1999-2000 through 2015-2016. *National Health Statistics Reports*. 2018;122.
12. McDowell M, Hughes J, Borrud LG. Health characteristics of U.S. adults by body mass index category: results from NHANES 1999-2002. *Public Health Rep*. 2006;121(1):67-73.
13. Martinez K, Tucker L, Bailey B, LeCheminant J. Expanded Normal Weight Obesity and Insulin Resistance in US Adults of the National Health and Nutrition Examination Survey. *J Diabetes Res*. 2017;2017:9502643-9502643.
14. Tarlov E, Silva A, Wing C, et al. Neighborhood Walkability and BMI Change: A National Study of Veterans in Large Urban Areas. *Obesity (Silver Spring, Md)*. 2020;28(1):46-54.
15. Armstrong C. JNC8 guidelines for the management of hypertension in adults. *American family physician*. 2014;90(7):503-504.
16. Rowan CG, Turner JR, Shah A, Spaeder JA. Antihypertensive treatment and blood pressure control relative to hypertension treatment guidelines. *Pharmacoepidemiology and drug safety*. 2014;23(12):1294-1302.
17. Freitag MH, Vasan RS. What is normal blood pressure? *Current opinion in nephrology and hypertension*. 2003;12(3):285-292.
18. O'Brien E, Parati G, Stergiou G. Ambulatory blood pressure measurement: what is the international consensus? *Hypertension (Dallas, Tex : 1979)*. 2013;62(6):988-994.
19. Agarwal R, Light RP. The effect of measuring ambulatory blood pressure on nighttime sleep and daytime activity--implications for dipping. *Clin J Am Soc Nephrol*. 2010;5(2):281-285.
20. Burg MM, Brandt C, Buta E, et al. Risk for Incident Hypertension Associated With Posttraumatic Stress Disorder in Military Veterans and the Effect of Posttraumatic Stress Disorder Treatment. *Psychosomatic medicine*. 2017;79(2):181-188.
21. Fletcher RD, Jones R, Moore H, et al. INCREASED BODY MASS INDEX (BMI) PROMOTES HYPERTENSION AND WORSENS BLOOD PRESSURE CONTROL AMONG US VETERANS. *Journal of the American College of Cardiology*. 2018;71(11 Supplement):A1817.
22. Peng M, Chen G, Kaplan GG, et al. Methods of defining hypertension in electronic medical records: validation against national survey data. *Journal of public health (Oxford, England)*. 2016;38(3):e392-e399.
23. Banerjee D, Chung S, Wong EC, Wang EJ, Stafford RS, Palaniappan LP. Underdiagnosis of hypertension using electronic health records. *American journal of hypertension*. 2012;25(1):97-102.
24. *Hypertension prevalence estimator tool*.
25. Soohoo M, Moradi H, Obi Y, Kovesdy CP, Kalantar-Zadeh K, Streja E. Serum triglycerides and mortality risk across stages of chronic kidney disease in 2 million U.S. veterans. *Journal of clinical lipidology*. 2019;13(5):744-753.e715.
26. Laclaustra M, Stranges S, Navas-Acien A, Ordovas JM, Guallar E. Serum selenium and serum lipids in US adults: National Health and Nutrition Examination Survey (NHANES) 2003-2004. *Atherosclerosis*. 2010;210(2):643-648.
27. Toth PP, Potter D, Ming EE. Prevalence of lipid abnormalities in the United States: the National Health and Nutrition Examination Survey 2003-2006. *Journal of clinical lipidology*. 2012;6(4):325-330.

28. Fleet JL, Dixon SN, Shariff SZ, et al. Detecting chronic kidney disease in population-based administrative databases using an algorithm of hospital encounter and physician claim codes. *BMC Nephrology*. 2013;14(1):81.
- 1 29. Prevention CfDca. *Prevalence of patients with an ICD-9-CM or ICD-10-CM code indicating CKD*.
- 2 30. Quan HS, V.; Halfon, P.; et al. Coding algorithms for defining comorbidities in ICD-9-CM and ICD-10 administrative data. *Medical care*. 2005;43(11):1130-1139.
- 3 31. Lix LS, M.; Piz, M.; Ahmed, R.; Quon, H.; Griffith, J., et al. *Cancer data linkage in manitoba: Expanding the infrastructure for research*. 2016.
- 4 32. Grams ME, Juraschek SP, Selvin E, et al. Trends in the prevalence of reduced GFR in the United States: a comparison of creatinine- and cystatin C-based estimates. *Am J Kidney Dis*. 2013;62(2):253-260.
- 5
- 6 33. Hemmelgarn BR, Manns BJ, Lloyd A, et al. Relation Between Kidney Function, Proteinuria, and Adverse Outcomes. *JAMA*. 2010;303(5):423-429.
- 7
- 8 34. Husain N, Blais P, Kramer J, Kowalkowski M, Richardson P, El-Serag HB, Kanwal F. Nonalcoholic fatty liver disease (NAFLD) in the Veterans Administration population: development and validation of an algorithm for NAFLD using automated data. *Alimentary pharmacology & therapeutics*. 2014 Oct;40(8):949-54.
- 9
- 10
- 11
- 12
- 13
- 14
- 15
- 16
- 17
- 18
- 19
- 20
- 21
- 22
- 23
- 24
- 25
- 26
- 27
- 28
- 29
- 30
- 31
- 32
- 33
- 34
- 35
- 36
- 37
- 38
- 39
- 40
- 41
- 42
- 43
- 44
- 45
- 46
- 47

For peer review only

STROBE Statement—Checklist of items that should be included in reports of *cohort studies*

|                           | Item No | Recommendation                                                                                                                                                                       | Page No |
|---------------------------|---------|--------------------------------------------------------------------------------------------------------------------------------------------------------------------------------------|---------|
| <b>Title and abstract</b> | 1       | (a) Indicate the study's design with a commonly used term in the title or the abstract                                                                                               | 1       |
|                           |         | (b) Provide in the abstract an informative and balanced summary of what was done and what was found                                                                                  | 1       |
| <b>Introduction</b>       |         |                                                                                                                                                                                      |         |
| Background/rationale      | 2       | Explain the scientific background and rationale for the investigation being reported                                                                                                 | 2       |
| Objectives                | 3       | State specific objectives, including any prespecified hypotheses                                                                                                                     | 2       |
| <b>Methods</b>            |         |                                                                                                                                                                                      |         |
| Study design              | 4       | Present key elements of study design early in the paper                                                                                                                              | 2,3     |
| Setting                   | 5       | Describe the setting, locations, and relevant dates, including periods of recruitment, exposure, follow-up, and data collection                                                      | 3       |
| Participants              | 6       | (a) Give the eligibility criteria, and the sources and methods of selection of participants. Describe methods of follow-up                                                           | 3       |
|                           |         | (b) For matched studies, give matching criteria and number of exposed and unexposed                                                                                                  | n/a     |
| Variables                 | 7       | Clearly define all outcomes, exposures, predictors, potential confounders, and effect modifiers. Give diagnostic criteria, if applicable                                             | 3,4     |
| Data sources/measurement  | 8*      | For each variable of interest, give sources of data and details of methods of assessment (measurement). Describe comparability of assessment methods if there is more than one group | 2       |
| Bias                      | 9       | Describe any efforts to address potential sources of bias                                                                                                                            | n/a     |
| Study size                | 10      | Explain how the study size was arrived at                                                                                                                                            | n/a     |
| Quantitative variables    | 11      | Explain how quantitative variables were handled in the analyses. If applicable, describe which groupings were chosen and why                                                         | 4       |
| Statistical methods       | 12      | (a) Describe all statistical methods, including those used to control for confounding                                                                                                | n/a     |
|                           |         | (b) Describe any methods used to examine subgroups and interactions                                                                                                                  | n/a     |
|                           |         | (c) Explain how missing data were addressed                                                                                                                                          | n/a     |
|                           |         | (d) If applicable, explain how loss to follow-up was addressed                                                                                                                       | 3       |
|                           |         | (e) Describe any sensitivity analyses                                                                                                                                                | n/a     |
| <b>Results</b>            |         |                                                                                                                                                                                      |         |

|    |                  |     |                                                                                                                                                                                                   |         |
|----|------------------|-----|---------------------------------------------------------------------------------------------------------------------------------------------------------------------------------------------------|---------|
| 1  | Participants     | 13* | (a) Report numbers of individuals at each stage of study—eg numbers potentially eligible, examined for eligibility, confirmed eligible, included in the study, completing follow-up, and analysed | 3       |
| 2  |                  |     |                                                                                                                                                                                                   |         |
| 3  |                  |     |                                                                                                                                                                                                   |         |
| 4  |                  |     |                                                                                                                                                                                                   |         |
| 5  |                  |     | (b) Give reasons for non-participation at each stage                                                                                                                                              | n/a     |
| 6  |                  |     |                                                                                                                                                                                                   |         |
| 7  |                  |     | (c) Consider use of a flow diagram                                                                                                                                                                | Figure1 |
| 8  | Descriptive data | 14* | (a) Give characteristics of study participants (eg demographic, clinical, social) and information on exposures and potential confounders                                                          | 4,5     |
| 9  |                  |     |                                                                                                                                                                                                   | Table 1 |
| 10 |                  |     |                                                                                                                                                                                                   |         |
| 11 |                  |     |                                                                                                                                                                                                   |         |
| 12 |                  |     | (b) Indicate number of participants with missing data for each variable of interest                                                                                                               | n/a     |
| 13 |                  |     |                                                                                                                                                                                                   |         |
| 14 |                  |     |                                                                                                                                                                                                   |         |
| 15 |                  |     | (c) Summarise follow-up time (eg, average and total amount)                                                                                                                                       | 3       |
| 16 | Outcome data     | 15* | Report numbers of outcome events or summary measures over time                                                                                                                                    | n/a     |
| 17 |                  |     |                                                                                                                                                                                                   |         |
| 18 |                  |     |                                                                                                                                                                                                   |         |
| 19 |                  |     |                                                                                                                                                                                                   |         |
| 20 |                  |     |                                                                                                                                                                                                   |         |
| 21 |                  |     |                                                                                                                                                                                                   |         |
| 22 |                  |     |                                                                                                                                                                                                   |         |
| 23 |                  |     |                                                                                                                                                                                                   |         |
| 24 |                  |     |                                                                                                                                                                                                   |         |
| 25 |                  |     |                                                                                                                                                                                                   |         |
| 26 |                  |     |                                                                                                                                                                                                   |         |
| 27 |                  |     |                                                                                                                                                                                                   |         |
| 28 |                  |     |                                                                                                                                                                                                   |         |
| 29 |                  |     |                                                                                                                                                                                                   |         |
| 30 |                  |     |                                                                                                                                                                                                   |         |
| 31 |                  |     |                                                                                                                                                                                                   |         |
| 32 |                  |     |                                                                                                                                                                                                   |         |
| 33 |                  |     |                                                                                                                                                                                                   |         |
| 34 |                  |     |                                                                                                                                                                                                   |         |
| 35 |                  |     |                                                                                                                                                                                                   |         |
| 36 |                  |     |                                                                                                                                                                                                   |         |
| 37 |                  |     |                                                                                                                                                                                                   |         |
| 38 |                  |     |                                                                                                                                                                                                   |         |
| 39 |                  |     |                                                                                                                                                                                                   |         |
| 40 |                  |     |                                                                                                                                                                                                   |         |
| 41 |                  |     |                                                                                                                                                                                                   |         |
| 42 |                  |     |                                                                                                                                                                                                   |         |
| 43 |                  |     |                                                                                                                                                                                                   |         |
| 44 |                  |     |                                                                                                                                                                                                   |         |
| 45 |                  |     |                                                                                                                                                                                                   |         |
| 46 |                  |     |                                                                                                                                                                                                   |         |
| 47 |                  |     |                                                                                                                                                                                                   |         |
| 48 |                  |     |                                                                                                                                                                                                   |         |
| 49 |                  |     |                                                                                                                                                                                                   |         |
| 50 |                  |     |                                                                                                                                                                                                   |         |
| 51 |                  |     |                                                                                                                                                                                                   |         |
| 52 |                  |     |                                                                                                                                                                                                   |         |
| 53 |                  |     |                                                                                                                                                                                                   |         |
| 54 |                  |     |                                                                                                                                                                                                   |         |
| 55 |                  |     |                                                                                                                                                                                                   |         |
| 56 |                  |     |                                                                                                                                                                                                   |         |
| 57 |                  |     |                                                                                                                                                                                                   |         |
| 58 |                  |     |                                                                                                                                                                                                   |         |
| 59 |                  |     |                                                                                                                                                                                                   |         |
| 60 |                  |     |                                                                                                                                                                                                   |         |

|    |                          |    |                                                                                                                                                                                                              |     |
|----|--------------------------|----|--------------------------------------------------------------------------------------------------------------------------------------------------------------------------------------------------------------|-----|
| 1  | Main results             | 16 | (a) Give unadjusted estimates and, if applicable, confounder-adjusted estimates and their precision (eg, 95% confidence interval). Make clear which confounders were adjusted for and why they were included | n/a |
| 2  |                          |    |                                                                                                                                                                                                              |     |
| 3  |                          |    |                                                                                                                                                                                                              |     |
| 4  |                          |    |                                                                                                                                                                                                              |     |
| 5  |                          |    | (b) Report category boundaries when continuous variables were categorized                                                                                                                                    |     |
| 6  |                          |    |                                                                                                                                                                                                              |     |
| 7  |                          |    | (c) If relevant, consider translating estimates of relative risk into absolute risk for a meaningful time period                                                                                             |     |
| 8  |                          |    |                                                                                                                                                                                                              |     |
| 9  |                          |    |                                                                                                                                                                                                              |     |
| 10 | Other analyses           | 17 | Report other analyses done—eg analyses of subgroups and interactions, and sensitivity analyses                                                                                                               |     |
| 11 |                          |    |                                                                                                                                                                                                              |     |
| 12 |                          |    |                                                                                                                                                                                                              |     |
| 13 | <b>Discussion</b>        |    |                                                                                                                                                                                                              |     |
| 14 |                          |    |                                                                                                                                                                                                              |     |
| 15 | Key results              | 18 | Summarise key results with reference to study objectives                                                                                                                                                     | 4/5 |
| 16 |                          |    |                                                                                                                                                                                                              |     |
| 17 | Limitations              | 19 | Discuss limitations of the study, taking into account sources of potential bias or imprecision. Discuss both direction and magnitude of any potential bias                                                   | 5   |
| 18 |                          |    |                                                                                                                                                                                                              |     |
| 19 | Interpretation           | 20 | Give a cautious overall interpretation of results considering objectives, limitations, multiplicity of analyses, results from similar studies, and other relevant evidence                                   | 5   |
| 20 |                          |    |                                                                                                                                                                                                              |     |
| 21 |                          |    |                                                                                                                                                                                                              |     |
| 22 | Generalisability         | 21 | Discuss the generalisability (external validity) of the study results                                                                                                                                        | 5   |
| 23 |                          |    |                                                                                                                                                                                                              |     |
| 24 |                          |    |                                                                                                                                                                                                              |     |
| 25 | <b>Other information</b> |    |                                                                                                                                                                                                              |     |
| 26 |                          |    |                                                                                                                                                                                                              |     |
| 27 | Funding                  | 22 | Give the source of funding and the role of the funders for the present study and, if applicable, for the original study on which the present article is based                                                | 6   |
| 28 |                          |    |                                                                                                                                                                                                              |     |
| 29 |                          |    |                                                                                                                                                                                                              |     |

\*Give information separately for exposed and unexposed groups.

**Note:** An Explanation and Elaboration article discusses each checklist item and gives methodological background and published examples of transparent reporting. The STROBE checklist is best used in conjunction with this article (freely available on the Web sites of PLoS Medicine at <http://www.plosmedicine.org/>, Annals of Internal Medicine at <http://www.annals.org/>, and Epidemiology at <http://www.epidem.com/>). Information on the STROBE Initiative is available at <http://www.strobe-statement.org>.
