# Supplementary material for: US veterans administration diabetes risk (VADR) national cohort: cohort profile
Source: PubMed Central journal article supplement — BMJ Open. 2020 Dec 4;10(12):e039489. doi: 10.1136/bmjopen-2020-039489 (PMC7722386; doi:10.1136/bmjopen-2020-039489), 2020-12-04
Supplement: bmjopen-2020-039489supp001.pdf [file bmjopen-2020-039489supp001.pdf]

## Appendix. Defining chronic conditions in the VA environment

| Component                                     | Definition                                                                                                                                                                                                                                                                                                                                                                                                                                                                                                                                                                                                                                                                                                                                                                                                                                                                                                                            | Details                                                                                                                                                                                                                                   |                                                                                                                                                                                                                                                                                                                                                                                                                                                                                                                                                                                                                                                                                                                                                                               |                                                                                                                                                      |                                                                                                                                                                                                                                                 |       |
|-----------------------------------------------|---------------------------------------------------------------------------------------------------------------------------------------------------------------------------------------------------------------------------------------------------------------------------------------------------------------------------------------------------------------------------------------------------------------------------------------------------------------------------------------------------------------------------------------------------------------------------------------------------------------------------------------------------------------------------------------------------------------------------------------------------------------------------------------------------------------------------------------------------------------------------------------------------------------------------------------|-------------------------------------------------------------------------------------------------------------------------------------------------------------------------------------------------------------------------------------------|-------------------------------------------------------------------------------------------------------------------------------------------------------------------------------------------------------------------------------------------------------------------------------------------------------------------------------------------------------------------------------------------------------------------------------------------------------------------------------------------------------------------------------------------------------------------------------------------------------------------------------------------------------------------------------------------------------------------------------------------------------------------------------|------------------------------------------------------------------------------------------------------------------------------------------------------|-------------------------------------------------------------------------------------------------------------------------------------------------------------------------------------------------------------------------------------------------|-------|
|                                               |                                                                                                                                                                                                                                                                                                                                                                                                                                                                                                                                                                                                                                                                                                                                                                                                                                                                                                                                       | ICD codes                                                                                                                                                                                                                                 |                                                                                                                                                                                                                                                                                                                                                                                                                                                                                                                                                                                                                                                                                                                                                                               | Labs                                                                                                                                                 | Medications*                                                                                                                                                                                                                                    | Other |
|                                               |                                                                                                                                                                                                                                                                                                                                                                                                                                                                                                                                                                                                                                                                                                                                                                                                                                                                                                                                       | ICD-9                                                                                                                                                                                                                                     | ICD-10                                                                                                                                                                                                                                                                                                                                                                                                                                                                                                                                                                                                                                                                                                                                                                        |                                                                                                                                                      |                                                                                                                                                                                                                                                 |       |
| <b>Type 2 Diabetes Mellitus<sup>1-4</sup></b> | <p>(1) At least two encounters (inpatient or outpatient) with documentation of a Type 2 diabetes ICD-9/10 code (ICD-9: 250.x; ICD-10: E11.x), <i>or</i></p> <p>(2) a documented prescription for a diabetes medication other than metformin or acarbose alone, <i>or</i></p> <p>(3) at least one encounter with a diabetes ICD-9/10 code and two elevated (<math>\geq 6.5\%</math>) glycosylated hemoglobin (Hgb A1C) lab test results</p> <ul style="list-style-type: none"> <li>• Implausible A1C labs removed (range based on NHANES reporting)</li> <li>• Multiple labs measured on the same day or on the same day and time were averaged if they ranged within 1%</li> <li>• A1C labs ranging <math>&gt;1\%</math> were removed</li> <li>• If only one A1C lab was available prior to cohort entry date, that lab was used.</li> <li>• If more than one A1C lab was available, the average of the last two was taken</li> </ul> | 250, 250.0, 250.00, 250.02, 250.1, 250.10, 250.12, 250.2, 250.20, 250.22, 250.3, 250.30, 250.32, 250.4, 250.40, 250.42, 250.5, 250.50, 250.52, 250.6, 250.60, 250.62, 250.7, 250.70, 250.72, 250.8, 250.80, 250.82, 250.9, 250.90, 250.92 | E11.00, E11.01, E11.21, E11.22, E11.29, E11.311, E11.319, E11.321, E11.3211, E11.3212, E11.3213, E11.3219, E11.329, E11.3291, E11.3292, E11.3293, E11.3299, E11.331, E11.3311, E11.3312, E11.3313, E11.3319, E11.339, E11.3391, E11.3392, E11.3393, E11.3399, E11.341, E11.3411, E11.3412, E11.3413, E11.3419, E11.349, E11.3491, E11.3492, E11.3493, E11.3499, E11.351, E11.3511, E11.3512, E11.3513, E11.3519, E11.352, E11.3521, E11.3522, E11.3523, E11.3529, E11.353, E11.3531, E11.3532, E11.3533, E11.3539, E11.354, E11.3541, E11.3542, E11.3543, E11.3549, E11.355, E11.3551, E11.3552, E11.3553, E11.3559, E11.359, E11.3591, E11.3592, E11.3593, E11.3599, E11.36, E11.37, E11.37X1, E11.37X2, E11.37X3, E11.37X9, E11.39, E11.40, E11.41, E11.42, E11.43, E11.44, | <p>LOINC code corresponding to A1C:</p> <ul style="list-style-type: none"> <li>• 17855-8</li> <li>17856-6</li> <li>4548-4</li> <li>4549-2</li> </ul> | Chloropropamide, glipizide, glyburide, glimepiride, metformin, repaglinide, nateglinide, tosiglitazone, pioglitazone, sitagliptin, saxagliptin, linagliptin, alogliptin, canagliflozin, dapagliflozin, acarbose, meglitol, colesevelam, insulin | -     |

|                      |                                                                                                                                                                                                                                                                                                                                                                                                                                                                                                                                                               |   |                                                                                                                                                        |                                          |   |                                 |
|----------------------|---------------------------------------------------------------------------------------------------------------------------------------------------------------------------------------------------------------------------------------------------------------------------------------------------------------------------------------------------------------------------------------------------------------------------------------------------------------------------------------------------------------------------------------------------------------|---|--------------------------------------------------------------------------------------------------------------------------------------------------------|------------------------------------------|---|---------------------------------|
|                      |                                                                                                                                                                                                                                                                                                                                                                                                                                                                                                                                                               |   | E11.49, E11.51, E11.52, E11.59, E11.610, E11.618, E11.620, E11.621, E11.622, E11.628, E11.630, E11.638, E11.641, E11.649, E11.65, E11.69, E11.8, E11.9 |                                          |   |                                 |
| <b>Comorbidities</b> |                                                                                                                                                                                                                                                                                                                                                                                                                                                                                                                                                               |   |                                                                                                                                                        |                                          |   |                                 |
| A1C <sup>4-10</sup>  | <p>(1) Mean and standard deviation calculated after identifying labs using LOINC codes</p> <ul style="list-style-type: none"> <li>Implausible A1C labs removed (range based on NHANES reporting)</li> <li>Multiple labs measured on the same day or on the same day and time were averaged if they ranged within 1%</li> <li>A1C labs ranging &gt;1% were removed</li> <li>If only one A1C lab was available prior to cohort entry date, that lab was used.</li> <li>If more than one A1C lab was available, the average of the last two was taken</li> </ul> | - | -                                                                                                                                                      | LOINC code corresponding to <u>A1C</u> : | - |                                 |
| BMI <sup>11-14</sup> | <p>(1) Calculated as weight (Kg)/[height(m)]<sup>2</sup>. Normal weight defined as BMI &lt; 25, Overweight defined as ≥25 and &lt;30, and Obese as ≥30</p> <p><u>Height:</u></p> <ul style="list-style-type: none"> <li>Implausible values removed (range based on published literature)</li> </ul>                                                                                                                                                                                                                                                           | - | -                                                                                                                                                      | -                                        | - | Obtained by vital signs records |

|                                      |                                                                                                                                                                                                                                                                                                                                                                                                                                                                                                                                                                                                                                                                                                                                                                                                                                                                                                                                                                                                                          |   |   |   |   |                                 |
|--------------------------------------|--------------------------------------------------------------------------------------------------------------------------------------------------------------------------------------------------------------------------------------------------------------------------------------------------------------------------------------------------------------------------------------------------------------------------------------------------------------------------------------------------------------------------------------------------------------------------------------------------------------------------------------------------------------------------------------------------------------------------------------------------------------------------------------------------------------------------------------------------------------------------------------------------------------------------------------------------------------------------------------------------------------------------|---|---|---|---|---------------------------------|
|                                      | <ul style="list-style-type: none"> <li>Multiple heights recorded during the same visit were averaged if they ranged within 3 inches (7.62 cm) or less</li> <li>Measurements ranging more than 3 inches were deleted</li> <li>If only one height measurement was available prior to cohort entry date, that height was used</li> <li>If more than one height measurement was available prior to cohort entry date, the average of the last two was taken</li> </ul> <p><u>Weight:</u></p> <ul style="list-style-type: none"> <li>Implausible values removed (range based on published literature)</li> <li>Multiple weights recorded during the same visit were averaged if they ranged within 10 lb (4.536 Kg) or less. Measurements ranging more than 10 lb were deleted</li> <li>If only one weight measurement was available prior to cohort entry date, that weight was used</li> <li>If more than one weight measurement was available prior to cohort entry date, the average of the last two was taken</li> </ul> |   |   |   |   |                                 |
| Blood Pressure (BP) <sup>15-19</sup> | (1) Mean and standard deviation of systolic and diastolic BP calculated                                                                                                                                                                                                                                                                                                                                                                                                                                                                                                                                                                                                                                                                                                                                                                                                                                                                                                                                                  | - | - | - | - | Obtained by vital signs records |

|                                     |                                                                                                                                                                                                                                                                                                                                                                                                                                                                                                                                                                 |                                                                      |                                                                                                                                                           |                                                                                                                                        |                                                                                                                                                                                                                                                                                                                                  |   |
|-------------------------------------|-----------------------------------------------------------------------------------------------------------------------------------------------------------------------------------------------------------------------------------------------------------------------------------------------------------------------------------------------------------------------------------------------------------------------------------------------------------------------------------------------------------------------------------------------------------------|----------------------------------------------------------------------|-----------------------------------------------------------------------------------------------------------------------------------------------------------|----------------------------------------------------------------------------------------------------------------------------------------|----------------------------------------------------------------------------------------------------------------------------------------------------------------------------------------------------------------------------------------------------------------------------------------------------------------------------------|---|
|                                     | <ul style="list-style-type: none"> <li>Records deleted if measured at nighttime (8pm to 7am) or if diastolic BP was greater than systolic BP</li> <li>Only BP measured within the 2 years prior to cohort entry was included</li> <li>BP measured on the same day was averaged</li> <li>If only one BP measured was available on, or prior to, cohort entry date, it was used as the baseline BP</li> <li>If more than one BP was available on, or prior to, cohort entry date, the average of the last two measurements was used as the baseline BP</li> </ul> |                                                                      |                                                                                                                                                           |                                                                                                                                        |                                                                                                                                                                                                                                                                                                                                  |   |
| Hypertension (HTN) <sup>20-24</sup> | (1) At least one ICD-9/10 code for HTN                                                                                                                                                                                                                                                                                                                                                                                                                                                                                                                          | 401.0, 401.1, 401.9                                                  | I10.X                                                                                                                                                     | -                                                                                                                                      | -                                                                                                                                                                                                                                                                                                                                | - |
| Hyperlipidemia <sup>25,26</sup>     | <p>(1) Elevated total cholesterol (&gt;240 mg/dL), <i>or</i></p> <p>(2) Lipid-lowering medication use, <i>or</i></p> <p>(3) at least 2 ICD-9/10 codes documenting hyperlipidemia</p>                                                                                                                                                                                                                                                                                                                                                                            | 272.0, 272.1, 272.2, 272.3, 272.4, 272.5, 272.6, 272.7, 272.8, 272.9 | E78, E78.0, E78.00, E78.01, E78.1, E78.2, E78.3, E78.4, E78.41, E78.49, E78.5, E78.6, E78.7, E78.70, E78.71, E78.72, E78.79, E78.8, E78.81, E78.89, E78.9 | <p>LOINC code corresponding to <u>Total cholesterol</u>:</p> <ul style="list-style-type: none"> <li>2093-3</li> <li>14647-2</li> </ul> | <p>Generic names for class "CV350":</p> <ul style="list-style-type: none"> <li>Atorvastatin</li> <li>Cholestyramin</li> <li>Colestipol</li> <li>Ezetimibe</li> <li>Ezetimibe/Simvastatin</li> <li>Gemfibrozil</li> <li>Lomitapide</li> <li>Mipomerson</li> <li>Pravastatin</li> <li>Rosuvastatin</li> <li>Simvastatin</li> </ul> | - |

|                                                    |                                                                                                                                                                                                                                                                                                                                                                                                                                                                                                                                                                                                                                                                        |                                                                                                                                            |                                          |                                                                                                                                                                                                                                                                                                                                                                                                                                                                                                       |   |   |
|----------------------------------------------------|------------------------------------------------------------------------------------------------------------------------------------------------------------------------------------------------------------------------------------------------------------------------------------------------------------------------------------------------------------------------------------------------------------------------------------------------------------------------------------------------------------------------------------------------------------------------------------------------------------------------------------------------------------------------|--------------------------------------------------------------------------------------------------------------------------------------------|------------------------------------------|-------------------------------------------------------------------------------------------------------------------------------------------------------------------------------------------------------------------------------------------------------------------------------------------------------------------------------------------------------------------------------------------------------------------------------------------------------------------------------------------------------|---|---|
| Lipids (HDL, LDL, Triglycerides) <sup>25-27</sup>  | <p>(1) Mean and standard deviation calculated after identifying labs using LOINC codes</p> <ul style="list-style-type: none"> <li>• Implausible values removed (range based on NHANES reporting)</li> <li>• The median of different lab values completed at the same day was taken</li> <li>• Lab values that are 50% &gt; or &lt; the median were considered outliers and removed</li> <li>• The median of the rest of the labs was taken as the lab value for that day</li> <li>• For all, if only one lab was available prior to the cohort entry date, that lab was used. If more than 1 lab value was available, the average of the last two was taken</li> </ul> | -                                                                                                                                          | -                                        | <p>LOINC codes corresponding to:</p> <p><u>HDL:</u></p> <ul style="list-style-type: none"> <li>• 2085-9</li> <li>• 18263-4</li> <li>• 9832-7</li> </ul> <p><u>LDL:</u></p> <ul style="list-style-type: none"> <li>• 13457-7</li> <li>• 18262-6</li> <li>• 2089-1</li> <li>• 14155-6</li> </ul> <p><u>Triglycerides:</u></p> <ul style="list-style-type: none"> <li>• 2571-8</li> <li>• 14927-8</li> <li>• 12228-3</li> <li>• 3049-4</li> <li>• 1644-4</li> <li>• 12951-0</li> <li>• 3048-6</li> </ul> | - | - |
| Chronic Kidney Disease (CKD) <sup>24,28,29</sup>   | (1) At least one ICD-9/10 code documenting CKD                                                                                                                                                                                                                                                                                                                                                                                                                                                                                                                                                                                                                         | 585.5X                                                                                                                                     | N18.X                                    | -                                                                                                                                                                                                                                                                                                                                                                                                                                                                                                     | - | - |
| Ischemic Heart Disease <sup>30</sup>               | (1) At least one ICD-9/10 code documenting ischemic heart disease                                                                                                                                                                                                                                                                                                                                                                                                                                                                                                                                                                                                      | 410.X, 411.X, 412.X, 413.X, 414.X                                                                                                          | I20.X, I21.X, 122.X, 123.X, 124.X, 125.X | -                                                                                                                                                                                                                                                                                                                                                                                                                                                                                                     | - | - |
| Heart Failure <sup>30,31</sup>                     | (1) At least one ICD-9/10 code documenting heart failure                                                                                                                                                                                                                                                                                                                                                                                                                                                                                                                                                                                                               | 428.X                                                                                                                                      | I50.X                                    | -                                                                                                                                                                                                                                                                                                                                                                                                                                                                                                     | - | - |
| Peripheral Vascular Disease (PVD) <sup>30,31</sup> | (1) At least one ICD-9/10 code documenting PVD                                                                                                                                                                                                                                                                                                                                                                                                                                                                                                                                                                                                                         | 440.0, 440.1, 440.2, 440.20, 440.21, 440.22, 440.23, 440.29, 440.4, 440.8, 440.9, 443.9, 557.0, 557.1, 557.9                               | I73.X                                    | -                                                                                                                                                                                                                                                                                                                                                                                                                                                                                                     | - | - |
| Stroke                                             | (1) At least one ICD-9/10 code documenting stroke                                                                                                                                                                                                                                                                                                                                                                                                                                                                                                                                                                                                                      | 346.60, 346.61, 346.62, 346.63, 432.0, 432.1, 432.9, 433.01, 433.11, 433.21, 433.31, 433.81, 433.91, 434.0, 434.00, 434.01, 434.1, 434.10, | I63.X                                    | -                                                                                                                                                                                                                                                                                                                                                                                                                                                                                                     | - | - |

|                           |                                                                                                                                                                                                                                                                                                                                                                                                                                                                                                                                                                                                                                                                             |                                                    |                |                                                                                                                                     |   |                            |
|---------------------------|-----------------------------------------------------------------------------------------------------------------------------------------------------------------------------------------------------------------------------------------------------------------------------------------------------------------------------------------------------------------------------------------------------------------------------------------------------------------------------------------------------------------------------------------------------------------------------------------------------------------------------------------------------------------------------|----------------------------------------------------|----------------|-------------------------------------------------------------------------------------------------------------------------------------|---|----------------------------|
|                           |                                                                                                                                                                                                                                                                                                                                                                                                                                                                                                                                                                                                                                                                             | 434.11, 434.9, 434.90, 434.91, 436.5, 430.X, 431.X |                |                                                                                                                                     |   |                            |
| Agent Orange              | (1) "Agent orange" flag was used to generate the number of people with this exposure                                                                                                                                                                                                                                                                                                                                                                                                                                                                                                                                                                                        | -                                                  | -              | -                                                                                                                                   | - | From patient problem lists |
| Hepatitis C               | (1) At least one ICD-9/10 code documenting Hepatitis C                                                                                                                                                                                                                                                                                                                                                                                                                                                                                                                                                                                                                      | 070.54                                             | B18.2          | -                                                                                                                                   | - | -                          |
| Hyperuricemia             | (1) At least one ICD-9/10 code documenting Hyperuricemia                                                                                                                                                                                                                                                                                                                                                                                                                                                                                                                                                                                                                    | 790.6                                              | E79.0          | -                                                                                                                                   | - | -                          |
| Polycystic Ovary Syndrome | (1) At least one ICD-9/10 code documenting Polycystic Ovary Syndrome                                                                                                                                                                                                                                                                                                                                                                                                                                                                                                                                                                                                        | 256.4                                              | E28.2          | -                                                                                                                                   | - | -                          |
| Gestational Diabetes      | (1) At least one ICD-9/10 code documenting Gestational Diabetes                                                                                                                                                                                                                                                                                                                                                                                                                                                                                                                                                                                                             | V12.21, 648.83                                     | Z86.32, 024.4X | -                                                                                                                                   | - | -                          |
| eGFR <sup>32,33</sup>     | (1) Mean and standard deviation calculated after identifying labs using LOINC codes <ul style="list-style-type: none"> <li>• Implausible eGFR values were excluded</li> <li>• The median of eGFR measured on the same day was taken, then values more than 50% different than the median were excluded as outliers</li> <li>• The median of the rest of the measures was taken as eGFR for that day</li> <li>• If only one eGFR was available prior to cohort entry date, it was taken as the baseline estimate</li> <li>• If more than one eGFR was available prior to cohort entry date, the average of the most recent two was taken as the baseline estimate</li> </ul> | -                                                  | -              | LOINC code corresponding to eGFR: <ul style="list-style-type: none"> <li>• 62238-1</li> <li>• 48643-1</li> <li>• 33914-3</li> </ul> | - | -                          |

|               |                                                                                                                                                                                                                                                                                                                                                                                                                                                                                                                                                                                                                                                                    |  |  |                                                                                                                                                                                                                                                                                                                                                                                                                                                                                                                                                                                                                                                                                                         |                                                                                                                                                                                                                                                                                                                                                                                                                                                                                                                                                                                                  |
|---------------|--------------------------------------------------------------------------------------------------------------------------------------------------------------------------------------------------------------------------------------------------------------------------------------------------------------------------------------------------------------------------------------------------------------------------------------------------------------------------------------------------------------------------------------------------------------------------------------------------------------------------------------------------------------------|--|--|---------------------------------------------------------------------------------------------------------------------------------------------------------------------------------------------------------------------------------------------------------------------------------------------------------------------------------------------------------------------------------------------------------------------------------------------------------------------------------------------------------------------------------------------------------------------------------------------------------------------------------------------------------------------------------------------------------|--------------------------------------------------------------------------------------------------------------------------------------------------------------------------------------------------------------------------------------------------------------------------------------------------------------------------------------------------------------------------------------------------------------------------------------------------------------------------------------------------------------------------------------------------------------------------------------------------|
| Liver enzymes | <p>(1) Mean and standard deviation calculated after identifying labs using LOINC codes</p> <ul style="list-style-type: none"> <li>• Implausible values removed (range based on NHANES reporting)</li> <li>• The median of different lab values completed at the same day was taken</li> <li>• Lab values that are 50% &gt; or &lt; the median were considered outliers and removed</li> <li>• The median of the rest of the labs was taken as the lab value for that day</li> </ul> <p>For all, if only one lab was available prior to the cohort entry date, that lab was used. If more than 1 lab value was available, the average of the last two was taken</p> |  |  | <p>LOINC codes corresponding to</p> <p><u>AST:</u></p> <ul style="list-style-type: none"> <li>• 14409-7</li> <li>• 14410-5</li> <li>• 43822-6</li> <li>• 88112-8</li> <li>• 14412-1</li> <li>• 14414-7</li> <li>• 16412-9</li> <li>• 1918-2</li> <li>• 27344-1</li> <li>• 14413-9</li> <li>• 1917-4</li> <li>• 1919-0</li> <li>• 1920-8</li> <li>• 30239-8</li> <li>• 14411-3</li> <li>• 44786-2</li> </ul> <p><u>ALT:</u></p> <ul style="list-style-type: none"> <li>• 1741-8</li> <li>• 25302-1</li> <li>• 54491-6</li> <li>• 1742-6</li> <li>• 1743-4</li> <li>• 44785-4</li> <li>• 16324-6</li> <li>• 50168-4</li> <li>• 76625-3</li> <li>• 1744-2</li> <li>• 54492-4</li> <li>• 77144-4</li> </ul> | <p>Exclusions:</p> <ul style="list-style-type: none"> <li>- Patients with hepatitis B and C (ICD-9: 070.2x, 070.3x, 070.41, 070.44, 070.51, 070.51, 070.54, 070.7x. ICD-10: B18.x)</li> <li>- alcohol abuse (ICD-9: 291.x, 303.0x, 303.9x, 305.0x. ICD-10 F10.x)</li> <li>- patients with other rare liver disease (ICD-9: 576.1, 275.03, 275.01, 275.1, 237.4, 571.42, 571.6, 275.09. ICD-10: 237.4, D44.0, D44.2, D44.9, 275.01, E83.110, 275.03, E83.118, E83.119, 275.09, E83.10, E83.19, 275.1, E83.00, E83.01, E83.09, 571.42, K75.4, 571.6, K74.3, K74.4, K74.5, 576.1, K83.0)</li> </ul> |
|---------------|--------------------------------------------------------------------------------------------------------------------------------------------------------------------------------------------------------------------------------------------------------------------------------------------------------------------------------------------------------------------------------------------------------------------------------------------------------------------------------------------------------------------------------------------------------------------------------------------------------------------------------------------------------------------|--|--|---------------------------------------------------------------------------------------------------------------------------------------------------------------------------------------------------------------------------------------------------------------------------------------------------------------------------------------------------------------------------------------------------------------------------------------------------------------------------------------------------------------------------------------------------------------------------------------------------------------------------------------------------------------------------------------------------------|--------------------------------------------------------------------------------------------------------------------------------------------------------------------------------------------------------------------------------------------------------------------------------------------------------------------------------------------------------------------------------------------------------------------------------------------------------------------------------------------------------------------------------------------------------------------------------------------------|

|                                   |                                                                                 |  |  |  |  |                                                                                                                                                                                                                                                                                                                                                                                                                                                                                                                                                                                                  |
|-----------------------------------|---------------------------------------------------------------------------------|--|--|--|--|--------------------------------------------------------------------------------------------------------------------------------------------------------------------------------------------------------------------------------------------------------------------------------------------------------------------------------------------------------------------------------------------------------------------------------------------------------------------------------------------------------------------------------------------------------------------------------------------------|
| Fatty liver disease <sup>34</sup> | At least 2 elevated ALT ( $\geq 40$ U/L) at least 6 months apart within 2 years |  |  |  |  | <p>Exclusions:</p> <ul style="list-style-type: none"> <li>- Patients with hepatitis B and C (ICD-9: 070.2x, 070.3x, 070.41, 070.44, 070.51, 070.51, 070.54, 070.7x. ICD-10: B18.x)</li> <li>- alcohol abuse (ICD-9: 291.x, 303.0x, 303.9x, 305.0x. ICD-10 F10.x)</li> <li>- patients with other rare liver disease (ICD-9: 576.1, 275.03, 275.01, 275.1, 237.4, 571.42, 571.6, 275.09. ICD-10: 237.4, D44.0, D44.2, D44.9, 275.01, E83.110, 275.03, E83.118, E83.119, 275.09, E83.10, E83.19, 275.1, E83.00, E83.01, E83.09, 571.42, K75.4, 571.6, K74.3, K74.4, K74.5, 576.1, K83.0)</li> </ul> |
|-----------------------------------|---------------------------------------------------------------------------------|--|--|--|--|--------------------------------------------------------------------------------------------------------------------------------------------------------------------------------------------------------------------------------------------------------------------------------------------------------------------------------------------------------------------------------------------------------------------------------------------------------------------------------------------------------------------------------------------------------------------------------------------------|

\* Medications are documented prescriptions, not prescriptions filled

#### References

1. Jones CD, Greenwood RH, Misra A, Bachmann MO. Incidence and progression of diabetic retinopathy during 17 years of a population-based screening program in England. *Diabetes care*. 2012;35(3):592-596.
2. Parikh SV, Saya S, Divanji P, et al. Risk of death and myocardial infarction in patients with peripheral arterial disease undergoing percutaneous coronary intervention (from the National Heart, Lung and Blood Institute Dynamic Registry). *The American journal of cardiology*. 2011;107(7):959-964.



3. Rassen JA, Bartels DB, Schneeweiss S, Patrick AR, Murk W. Measuring prevalence and incidence of chronic conditions in claims and electronic health record databases. *Clinical epidemiology*. 2019;11:1-15.
4. Carls G, Huynh J, Tuttle E, Yee J, Edelman SV. Achievement of Glycated Hemoglobin Goals in the US Remains Unchanged Through 2014. *Diabetes Ther*. 2017;8(4):863-873.
5. Pani LN, Korenda L, Meigs JB, et al. Effect of aging on A1C levels in individuals without diabetes: evidence from the Framingham Offspring Study and the National Health and Nutrition Examination Survey 2001-2004. *Diabetes care*. 2008;31(10):1991-1996.
6. Nicolo M, Boullata JI. Serum 25OHD concentration as a predictor of haemoglobin A1c among adults living in the USA: NHANES 2003 to 2010. *BMJ Nutrition, Prevention & Health*. 2019:bmjnph-2019-000029.
7. Davis PJ, Liu M, Sherman S, et al. HbA1c, lipid profiles and risk of incident type 2 Diabetes in United States Veterans. *PloS one*. 2018;13(9):e0203484.
8. Gillett M. International Expert Committee report on the role of the A1C assay in the diagnosis of diabetes. *Diabetes care*. 2009;32(7):1327-1334.
9. *Laboratory Procedure Manual: Glycohemoglobin*
10. Heinemann LF, G. Quality of HbA1c measurement in the practice: The german perspective. *J Diabetes Science and Technology*. 2015;9(3):687-695.
11. Fryar CK-M, D; Gu, Q; Ogden, CL. Mean body weight, height, waist circumference, and body mass index among adults: United States, 1999-2000 through 2015-2016. *National Health Statistics Reports*. 2018;122.
12. McDowell M, Hughes J, Borrud LG. Health characteristics of U.S. adults by body mass index category: results from NHANES 1999-2002. *Public Health Rep*. 2006;121(1):67-73.
13. Martinez K, Tucker L, Bailey B, LeCheminant J. Expanded Normal Weight Obesity and Insulin Resistance in US Adults of the National Health and Nutrition Examination Survey. *J Diabetes Res*. 2017;2017:9502643-9502643.
14. Tarlov E, Silva A, Wing C, et al. Neighborhood Walkability and BMI Change: A National Study of Veterans in Large Urban Areas. *Obesity (Silver Spring, Md)*. 2020;28(1):46-54.
15. Armstrong C. JNC8 guidelines for the management of hypertension in adults. *American family physician*. 2014;90(7):503-504.
16. Rowan CG, Turner JR, Shah A, Spaeder JA. Antihypertensive treatment and blood pressure control relative to hypertension treatment guidelines. *Pharmacoepidemiology and drug safety*. 2014;23(12):1294-1302.
17. Freitag MH, Vasan RS. What is normal blood pressure? *Current opinion in nephrology and hypertension*. 2003;12(3):285-292.
18. O'Brien E, Parati G, Stergiou G. Ambulatory blood pressure measurement: what is the international consensus? *Hypertension (Dallas, Tex : 1979)*. 2013;62(6):988-994.
19. Agarwal R, Light RP. The effect of measuring ambulatory blood pressure on nighttime sleep and daytime activity--implications for dipping. *Clin J Am Soc Nephrol*. 2010;5(2):281-285.
20. Burg MM, Brandt C, Buta E, et al. Risk for Incident Hypertension Associated With Posttraumatic Stress Disorder in Military Veterans and the Effect of Posttraumatic Stress Disorder Treatment. *Psychosomatic medicine*. 2017;79(2):181-188.
21. Fletcher RD, Jones R, Moore H, et al. INCREASED BODY MASS INDEX (BMI) PROMOTES HYPERTENSION AND WORSENS BLOOD PRESSURE CONTROL AMONG US VETERANS. *Journal of the American College of Cardiology*. 2018;71(11 Supplement):A1817.
22. Peng M, Chen G, Kaplan GG, et al. Methods of defining hypertension in electronic medical records: validation against national survey data. *Journal of public health (Oxford, England)*. 2016;38(3):e392-e399.
23. Banerjee D, Chung S, Wong EC, Wang EJ, Stafford RS, Palaniappan LP. Underdiagnosis of hypertension using electronic health records. *American journal of hypertension*. 2012;25(1):97-102.
24. *Hypertension prevalence estimator tool*.
25. Soohoo M, Moradi H, Obi Y, Kovesdy CP, Kalantar-Zadeh K, Streja E. Serum triglycerides and mortality risk across stages of chronic kidney disease in 2 million U.S. veterans. *Journal of clinical lipidology*. 2019;13(5):744-753.e715.
26. Laclaustra M, Stranges S, Navas-Acien A, Ordovas JM, Guallar E. Serum selenium and serum lipids in US adults: National Health and Nutrition Examination Survey (NHANES) 2003-2004. *Atherosclerosis*. 2010;210(2):643-648.
27. Toth PP, Potter D, Ming EE. Prevalence of lipid abnormalities in the United States: the National Health and Nutrition Examination Survey 2003-2006. *Journal of clinical lipidology*. 2012;6(4):325-330.

28. Fleet JL, Dixon SN, Shariff SZ, et al. Detecting chronic kidney disease in population-based administrative databases using an algorithm of hospital encounter and physician claim codes. *BMC Nephrology*. 2013;14(1):81.
29. Prevention CfDca. *Prevalence of patients with an ICD-9-CM or ICD-10-CM code indicating CKD*.
30. Quan HS, V.; Halfon, P.; et al. Coding algorithms for defining comorbidities in ICD-9-CM and ICD-10 administrative data. *Medical care*. 2005;43(11):1130-1139.
31. Lix LS, M.; Piz, M.; Ahmed, R.; Quon, H.; Griffith, J., et al. *Cancer data linkage in manitoba: Expanding the infrastructure for research*. 2016.
32. Grams ME, Juraschek SP, Selvin E, et al. Trends in the prevalence of reduced GFR in the United States: a comparison of creatinine- and cystatin C-based estimates. *Am J Kidney Dis*. 2013;62(2):253-260.
33. Hemmelgarn BR, Manns BJ, Lloyd A, et al. Relation Between Kidney Function, Proteinuria, and Adverse Outcomes. *JAMA*. 2010;303(5):423-429.
34. Husain N, Blais P, Kramer J, Kowalkowski M, Richardson P, El-Serag HB, Kanwal F. Nonalcoholic fatty liver disease (NAFLD) in the Veterans Administration population: development and validation of an algorithm for NAFLD using automated data. *Alimentary pharmacology & therapeutics*. 2014 Oct;40(8):949-54.
